# Supplementary material
Source: PubMed Central journal article supplement (PMC3371395)

# Supplementary Materials

## for “Multiple Genetic Loci Influence Serum Urate And Their Relationship With Gout and Cardiovascular Disease Risk Factors”

### Contents

|                                                                                                                        |    |
|------------------------------------------------------------------------------------------------------------------------|----|
| Supplementary Methods .....                                                                                            | 2  |
| Description of Participating studies .....                                                                             | 2  |
| AGES Reykjavik Study .....                                                                                             | 2  |
| Atherosclerosis Risk in Communities Study (ARIC) .....                                                                 | 3  |
| Cardiovascular Health Study (CHS) .....                                                                                | 4  |
| Framingham Heart Study (FHS) .....                                                                                     | 5  |
| The Rotterdam Study (RS) .....                                                                                         | 6  |
| Women’s Health Genome Study .....                                                                                      | 7  |
| Imputation of HapMap SNPs .....                                                                                        | 8  |
| Adjusting for Potential Population Admixture .....                                                                     | 8  |
| Genetic Urate Score Construction .....                                                                                 | 9  |
| Power of Genetic Urate Score analyses .....                                                                            | 9  |
| Secondary Analyses (Methods and Results) .....                                                                         | 10 |
| Sensitivity Analyses .....                                                                                             | 10 |
| Individual SNP Association with Cardiovascular Risk Factors and CHD .....                                              | 10 |
| Binay Genetic Urate Score .....                                                                                        | 11 |
| Supplementary Tables and Figures .....                                                                                 | 15 |
| Table 1s. Study-specific genotyping and analysis information for all cohorts .....                                     | 15 |
| Table 2s. Information of the most significant SNPs at loci significantly associated with urate in CHARGE cohorts ..... | 17 |
| Table 3s. Information of the most significant SNPs at loci significantly associated with urate in CHARGE cohorts ..... | 19 |
| Table 4s. Association of genetic urate score with CVD risk factors and CHD in 22,054 individuals from the WGHS .....   | 20 |
| Table 5s. Single SNP association with CVD risk factors and CHD in CHARGE cohorts .....                                 | 21 |
| Table 6s. SNPs associated with serum urate (p-value $\leq 4e-7$ ) in meta analyses of CHARGE cohorts .....             | 23 |
| Table 7s. SNPs Associated with Gout (p $<4e-7$ ) and MAF $\geq 0.02$ in meta-analysis of CHARGE cohorts. ....          | 48 |
| Figure 1s. Genome-wide association results from meta-analyses of five studies for urate and gout. ....                 | 52 |
| Figure 2s. Regional plots of loci associated with urate (A-H) .....                                                    | 52 |
| Figure 3s. Forest plots of the eight genome-wide significant loci for serum urate. ....                                | 52 |

## Supplementary Methods

### *Description of Participating studies*

#### *AGES Reykjavik Study*

The Reykjavik Study cohort originally comprised a random sample of 30,795 men and women born in 1907–1935 and living in Reykjavik in 1967<sup>1</sup>. Between 2002 and 2006, the AGES-Reykjavik Study re-examined 5,764 survivors of the original cohort who had participated before in the Reykjavik Study. The AGES Reykjavik Study GWAS was approved by the National Bioethics Committee (00-063-V8+1) and the Data Protection Authority. DNA was genotyped using the Illumina 370CNV BeadChip array on 3,664 participants. Samples were excluded from the dataset based on sample failure, genotype mismatch with reference panel, and sex mismatch, resulting in clean genotype data on 3,219 individuals. Standard protocols for working with Illumina data were followed, with clustering score greater than 0.4. Prior to genotype imputation, SNPs were excluded using filters based on call rate (<97%), Hardy-Weinberg Equilibrium (<1e-6), mishap (<1e-9), and mismatched positions between Illumina, dbSNP and/or HapMap resulting in 325,094 SNPs passing all QC (of 353,202 prior to cleaning steps). Imputation was done using MACH against the HapMap CEU haplotypes (release 22/NCBI build 36) resulting in 2,533,153 total SNPs for analysis. Association analysis was conducted against all genotypes, and includes the most likely imputed genotypes.

Serum urate was measured at the Icelandic Heart Association using the Roche-Hitachi P-Module instrument with Roche uricase method. The coefficient of variation for the urate assay was 4.3%. Gout was determined from a positive answer on a questionnaire or if the participant was on allopurinol treatment at a study visit. The final analyses sample consisted of 3,202 individuals for serum urate and 3,219 for gout.

Diabetes was defined as fasting glucose of at least 126 mg/dl, pharmacologic treatment for diabetes, or self-report. Blood pressure was measured in the supine position after a 5-minute

rest, twice by a nurse using a mercury sphygmomanometer. World Health Organization recommendations were used to measure blood pressure<sup>2</sup>. Insulin was measured using an electrochemiluminescence immunoassay on a Roche Elecsys 2010 instrument, using two monoclonal antibodies and a sandwich principle. The method was standardized using the 1st IRP WHO Reference Standard 66/304 (NIBSC). Coronary heart disease was defined as history of myocardial infarction, percutaneous coronary interventions, or coronary artery bypass grafting.

#### *Atherosclerosis Risk in Communities Study (ARIC)*

The Atherosclerosis Risk in Communities Study (ARIC) is an ongoing population-based prospective study. From 1987-98, 15,792 mostly self-reported black and white adults aged 45-64 years were recruited from four US communities and attended a baseline visit (visit 1)<sup>3</sup>. Participants returned for three subsequent visits approximately every three years. Details about the study have been published previously<sup>3</sup>. Genotyping was conducted among all consenting individuals using the Affymetrix 6.0 array, and genome-wide association data on 8,861 white individuals was available for the current study. Genomic DNA was hybridized in accordance with the manufacturer's standard recommendations, and genotypes were determined using the Birdseed clustering algorithm. Individual samples were filtered to ensure genotyping quality, and 734 out of 8,861 samples were removed in data cleaning steps for sex mismatch, discordance with previously-genotyped markers, first-degree relative of an included individual, and genetic outliers based on allele sharing and principal components analyses<sup>4;5</sup>.

Serum urate concentrations were measured at the baseline visit using a uricase method<sup>6</sup>. Repeat measurements in 40 individuals at least 1 week apart yielded a coefficient of variation of 7.2% and a reliability coefficient of 0.91<sup>7</sup>. Gout was self-reported at the fourth study visit (1996-98). Systolic and diastolic blood pressure was measured three times in the seated position after 5 minutes of rest using a random zero sphygmomanometer, and the average of the 2nd and 3rd measurement was used in analyses. Diabetes was defined as fasting serum glucose  $\geq 126$  mg/dl, non-fasting glucose  $\geq 200$  mg/dl, self-reported physician diagnosis of diabetes, or the current

use of diabetes medications. Fasting serum insulin was measured by radioimmunoassay (125Insulin kit; Cambridge Medical Diagnosis, Bilerica, MA), with a 7 pmol/l lower limit of sensitivity and 33% cross-reactivity with proinsulin. CHD was defined as incident myocardial infarction, fatal CHD, silent MI from EKG or coronary revascularization procedure. The final study sample with available genotype and phenotype data consisted of 8,092 individuals for the analyses of urate and 6,557 individuals for the analyses of gout.

### *Cardiovascular Health Study (CHS)*

The Cardiovascular Health Study (CHS) is a population-based longitudinal study of risk factors for cardiovascular disease and stroke in adults 65 years of age or older, recruited at four field centers (Forsyth County, NC; Sacramento County, CA; Washington County, MD; Pittsburgh, PA) 8. Predominantly Caucasian individuals (n=5,201) were recruited in 1989-1990 from random samples of Medicare eligibility lists, followed by an additional 687 African-Americans recruited in 1992-1993 (total n=5,888). The CHS GWAS had the primary aim of studying incident cardiovascular events in participants who were free of clinical cardiovascular disease at baseline. A total of 1,908 persons were excluded from the GWAS study sample due to the presence at study baseline of coronary heart disease, congestive heart failure, peripheral vascular disease, valvular heart disease, stroke or transient ischemic attack or lack of available DNA. African American participants were excluded from this analysis since the other cohorts were predominantly Caucasian.

DNA was extracted from blood samples drawn on all participants at the baseline examination. In 2007-2008, genotyping was performed at the General Clinical Research Center's Genotyping Laboratory at Cedars-Sinai Medical Center using the Illumina HumanCNV370-Duo BeadChip system. Genotypes were called using the Illumina BeadStudio software. Genotyping was successful in 3,291 persons. The following exclusions were applied to identify a final set of

306,655 autosomal SNPs used for imputation: call rate <97%; HWE  $P < 10^{-5}$ ; >1 duplicate error or Mendelian inconsistency; heterozygote frequency=0; SNPs not found in dbSNP.

Serum urate concentrations were measured at the baseline visit using the Kodak Ektachem 700 Analyzer with reagents (Eastman Kodak, Rochester, NY). The coefficient of variation for urate was 1.2%<sup>9</sup>. The final study sample with available genotype and phenotype data consisted of 3,252 individuals for the analyses of urate. Gout cases were identified through participants' medication use that was recorded at yearly clinic visits from 1989-1998<sup>10</sup>, and during annual and 6-month follow-up phone calls from 1998 – 2004. Participants receiving gout medication (allopurinol, colchicine, and probenecid) were considered gout cases.

Using blood collected at the baseline visit, 12-hour fasting serum insulin was measured with a Kodak Ektachem 700 analyzer (Eastman Kodak Corp., Rochester, NY). Research staff who received central training in blood pressure measurement assessed repeat right-arm seated systolic and diastolic blood pressure levels at baseline with a Hawksley random-zero sphygmomanometer. Diabetes was defined as fasting plasma glucose of at least 126 mg/dl or treatment with diabetes medication. CHD was defined as incident myocardial infarction, fatal CHD, sudden cardiac arrest<sup>11</sup>.

### *Framingham Heart Study (FHS)*

The FHS is a community-based prospective cohort study started in 1948 with 5,209 randomly ascertained participants from Framingham, Massachusetts, United States<sup>12</sup>. In 1971, 5,124 children of the original cohort, and children's spouses, referred as the Offspring cohort, were enrolled. In 2002, the Third Generation, consisting of 4,095 children of the Offspring cohort, was recruited. Most FHS participants are self-identified as Caucasian (white).

Among them, 9,274 participants from all three generations were genotyped, using the Affymetrix 500K mapping array and the Affymetrix 50K supplemental array (SNP Health Association Resource; [www.ncbi.nlm.nih.gov/projects/gap/cgi-bin/study.cgi?study\\_id=phs000007.v2.p1](http://www.ncbi.nlm.nih.gov/projects/gap/cgi-bin/study.cgi?study_id=phs000007.v2.p1)).

Serum urate was measured at the first examination cycle of each cohort using an autoanalyzer with a phosphotungstic acid reagent<sup>13</sup>. Gout was ascertained via self-report in the Offspring subjects during exam cycles 3-7, and the first exam of the Third Generation. Systolic and diastolic blood pressure was measured in the left arm twice by an examining physician with a sphygmomanometer after the participant had been in a seated position for 5 minutes. Diabetes was defined as fasting plasma glucose of at least 126 mg/dl or treatment. Fasting insulin levels (total immunoreactive insulin) were measured at Offspring examination 5 in EDTA plasma (Coat-A-Count Insulin, Diagnostic Products Corporation, Los Angeles, CA). Coronary heart disease was defined as myocardial infarction or fatal coronary heart disease. Principal components of the genotypes of 550K SNPs were computed using the Eigenstrat software<sup>5</sup>, and none of the first 10 components were found association with either urate levels or gout using a Bonferroni correction on alpha of 0.05, which indicated that there is little population admixture for these two traits and therefore no need to adjust for admixture in GWAS.

#### *The Rotterdam Study (RS)*

The Rotterdam study is a population-based cohort study designed to study the etiology of chronic diseases among participants aged 55 years and older<sup>14;15</sup>. Briefly, residents of Ommoord, a district of Rotterdam, in the Netherlands, 55 years of age or older, were asked to participate. The baseline examination, conducted in 1990-1993, consisted of a home interview and research center visit for blood samples. This cohort was referred as RS-I. In 1999, inhabitants who turned 55 years of age or moved into the study district since the start of the study were invited to participate in the extended Rotterdam study, of whom 3,011 participated and was referred as RS-II.

Serum urate was measured at the baseline visit using a Kone Diagnostica reagent kit and autoanalyzer<sup>16</sup>. Using a computer network of pharmacies, data on medication prescription use was abstracted from pharmacies in the study region that registers all medication prescriptions

beginning January 1, 1991. Participants receiving medication (allopurinol, benzbromarone, colchicine, and probenecid) were considered gout cases.

The Illumina 550K array was used to conduct genotyping among self-reported Caucasians. Participants were excluded for the following reasons: mismatch between called and phenotypic gender, excess autosomal heterozygosity, or outliers identified by the IBS clustering analysis. SNPs were excluded for the following reasons: SNP call rate  $\leq 90\%$ , minor allele frequency  $\leq 1\%$ , or Hardy-Weinberg equilibrium  $p$ -value  $< 10^{-5}$ , resulting in data on a total of 530,683 SNPs for RS-I and 495,478 SNPs in RS-II. The final sample for this analysis comprised 4,148 individuals in RS-I and 1,890 individuals in RS-II for serum urate, and 5,741 in RS-I and 1,895 in RS-II for gout.

Blood pressure was assessed using the mean of two measurements in a sitting position using a random-zero sphygmomanometer in the same session. Diabetes was defined as treatment for diabetes, an elevated nonfasting glucose level (11.1 mmol/L) or an abnormal oral glucose tolerance test. Insulin was measured using a Roche kit. Coronary heart disease was defined as fatal or nonfatal myocardial infarction (ICD-10 code I21), coronary artery bypass grafting (CABG), and percutaneous transluminal coronary angioplasty (PTCA).

#### *Women's Health Genome Study*

The Women's Genome Health Study (WGHS) <sup>17</sup> was used as a replication sample. The WGHS originated from the Women's Health Study (WHS) in 1992 <sup>18</sup> and included women without a prior history of cardiovascular disease, cancer, or other major chronic illness with a baseline blood sample from the time of study enrollment that was used for the extraction of genomic DNA. For the current analysis, individuals were excluded for the following reasons: 1) genotyping call rates  $< 98\%$ ; 2) discrepancies based on comparisons of previously obtained genotypes; 3) outliers identified by 9 clustering analyses; 22,054 had data on both phenotype and genotype available. In 2007-2008, genotyping was conducted using HumanHap300 Duo-Plus chip or the combination of the I-Select and the HumanHap300 Duo chips, resulting in a total of

363,808 SNPs. SNP exclusion criteria included: 1) SNP call rates <90%; 2) deviation from Hardy-Weinberg equilibrium ( $p < 10^{-5}$ ); 3) SNPs with minor allele frequency <1% in Caucasians, yielding 340,923 SNPs for analysis.

Imputed genotypes for individuals missing experimental genotypes and for SNPs not evaluated in the genotyping platform were determined by MACH 1.0<sup>19</sup>, using linkage disequilibrium relationships from the HapMap release 21. For the present analysis, the most likely genotype for each SNP was used in the regression models.

Baseline clinical information included information for SBP, DBP, history of hypertension, use of hypertension medication, and prevalent diabetes by self report. Blood pressure was reported in pre-specified categories, and analyzed on the basis of the mid-point of these categories as previously described<sup>20</sup>. Serum creatinine was calibrated and estimated GFR was calculated using the MDRD equation; CKD was defined as eGFR < 60 ml/min. Incident cardiovascular disease was validated on the basis of medical records by an endpoints committee of the Women's Health Study.

### ***Imputation of HapMap SNPs***

Genotypes were imputed to ~2.5 million HapMap SNPs by each cohort using directly genotyped SNPs with reference to phased haplotypes of release 22 from the HapMap CEU samples using a hidden Markov chain approach implemented in MACH<sup>19</sup> or BimBam v0.99<sup>21</sup>. The resulting “dosage” estimates from the imputation, i.e. the posterior mean of the genotypes in additive coding, was used as genotypes in the association analyses to account for estimation uncertainty in the genotypes. Study specific information on genotyping, imputation and statistical analyses is included in Supplementary Table 1s.

### ***Adjusting for Potential Population Admixture***

Prior to GWAS, population stratification was examined in all cohorts using EIGENSTRAT<sup>5</sup> or PLINK<sup>4</sup> identity by state (IBS) clustering analysis and no significant stratification was observed in any of the populations for these phenotypes. Individual study results were evaluated and



corrected for a trait-specific genomic control parameter<sup>22</sup> ( $\lambda < 1.05$  in all studies) prior to meta analyses.

### ***Genetic Urate Score Construction***

To model the cumulative effects of the loci identified from the urate meta-analysis, we multiplied the number of HapMap minor alleles for the most significant SNP for each locus in each person (0, 1, or 2) by the beta coefficient estimated from the meta-analysis, and added the results to calculate a genetic urate score. Specifically, the genetic urate score equals  $rs1967017(T)*3.3 + rs780093(T)*5.2 - rs13129697(G)*22.2 + rs2199936(A)*18.1 + rs675209(T)*4.4 - rs1165196(G)*6.2 + rs2078267(C)*6.8 - rs1106766(T)*5.2$ , where each SNP followed by the allele in parenthesis denotes number of that allele carried by an individual.

### ***Power of Genetic Urate Score analyses***

Denote  $\hat{\beta}$  as the coefficient of a linear regression model of a continuous trait on genetic urate score,  $\hat{\beta} \sim N(\beta, \sigma^2)$ . Under the null hypothesis,  $\beta = 0$ . Since we are interested in testing if the genetic urate score association is in the same direction as the epidemiology association, the alternative hypothesis is one-sided, e.g.  $\beta > 0$  if serum urate is positively associated with the trait.

Therefore, the power for detecting  $\beta = \beta_1$  at  $\alpha=0.05$  is

$$\begin{aligned} power &= P\left(\frac{\hat{\beta}}{se(\hat{\beta})} > 1.65 \mid \beta = \beta_1\right) \\ &= P\left(\frac{\hat{\beta} - \beta_1}{se(\hat{\beta})} > 1.65 - \frac{\beta_1}{se(\hat{\beta})} \mid \beta = \beta_1\right) \\ &= P\left(Z > 1.65 - \frac{\beta_1}{se(\hat{\beta})}\right) \end{aligned}$$

where 1.65 is the critical value of a one sided Z test at  $\alpha=0.05$ .

$\beta_1$  corresponding to 80% power can be obtained by solving above equation at power=80%

i.e.  $1.65 - \frac{\beta_1}{se(\hat{\beta})} = -1.28$ , where -1.28 is the standard normal quantile corresponding to 80% tail

probability. Thus  $\beta_1 = (1.65 + 1.28) * se(\hat{\beta})$  is the expected effect size that can be detected with 80% power. For a dichotomous (survival) outcome,  $\hat{\beta}$ , is the log odds ratio (log hazard ratio) and same power calculation as continuous trait can be used to obtain  $\beta_1$ . Odds ratio (hazard ratio) corresponding to 80% power can be obtained by transforming  $\beta_1$ .

## ***Secondary Analyses (Methods and Results)***

### *Sensitivity Analyses*

To evaluate the extent to which the current genetic urate score performance is enhanced by being developed and evaluated in the same cohorts, we compared the performance in FHS of the current score score to a genetic urate score developed in all cohorts except FHS. The scores had very similar associations to serum urate (beta coefficient of 0.95 vs. 0.93 and nearly identical p-values= $4 \times 10^{-101}$ ) suggesting the results of our large meta analysis may generalize well to similar populations.

### *Individual SNP Association with Cardiovascular Risk Factors and CHD*

We carried out analyses to examine the association between each individual SNP among the eight most significant SNPs and blood pressure, glucose, CKD and CHD. A Bonferroni corrected alpha 0.0016, i.e. 0.05/8/4 for 4 trait classes (blood pressure, glucose, CKD, CHD) and 8 SNPs, was used as significance threshold. The results, shown in Supplement table 5s, indicate that except fasting glucose and log eGFR creatinine, no other trait-SNP associations reached the pre-specified significance level.

SNP rs780093 in *GCKR* was borderline associated with glucose after multiple testing correction (beta=-0.03 mmol/l, P=0.0017), and the association was stronger in the absence of diagnosed diabetes (beta = -0.026 mmol/l, P = 2.8x10<sup>-8</sup>). Since this SNP is associated with higher serum urate and lower glucose it can not account for the observed epidemiologic associations between elevated urate levels and diabetes. None of the other SNPs included in the genetic urate score were associated with glucose levels.

Two loci were associated with log transformed eGFR creatinine (Table 5s). The minor allele of SNP rs1106766 in the *R3HDM2-INHBC* locus was associated with higher log transformed eGFR (beta= 0.01, P=1.3x10<sup>-5</sup>) and lower serum urate levels, consistent with the inverse correlation of urate levels with eGFR. This finding was also observed in WGHS (beta=0.00096, P= 0.00034). The other locus, *RREB1* also showed association with log transformed eGFR. However, the minor allele was associated with higher serum urate levels and higher eGFR, which is not direction-consistent to the observed association between elevated urate levels and lower eGFR. A third locus, *GCKR* was borderline associated but similar to *RREB1*, directional inconsistent with the relationship between urate and eGFR. All remaining five SNPs were not associated with log eGFR. Together, the *R3HDM2-INHBC* locus alone is unlikely to mediate a causal relationship between urate and eGFR, and all three loci (*R3HDM2-INHBC*, *GCKR* and *RREB1*) may have pleiotropic effects on urate and eGFR.

#### *Binary Genetic Urate Score*

To examine a possible threshold effect of serum urate on cardiovascular risk factors and CHD, we created a binary genetic score by dichotomizing the continuous genetic urate score at zero, corresponding to a mean urate level of ~333 µmol/L or 5.6 mg/dL.

The binary genetic urate score was only borderline associated with CKD (OR=1.12, p=0.01), and not associated with any other cardiovascular risk factors or coronary heart disease (all P>0.05).

## Reference List

1. Harris TB, Launer LJ, Eiriksdottir G, Kjartansson O, Jonsson PV, Sigurdsson G, Thorgeirsson G, Aspelund T, Garcia ME, Cotch MF, Hoffman HJ, Gudnason V. Age, Gene/Environment Susceptibility-Reykjavik Study: multidisciplinary applied phenomics. *Am J Epidemiol.* 2007;165:1076-1087.
2. Rose GA and Blackburn H. Cardiovascular population studies: Methods. 2009. Geneva: World Health Organization. 1966.  
Ref Type: Conference Proceeding
3. The Atherosclerosis Risk in Communities (ARIC) Study: design and objectives. The ARIC investigators. *Am J Epidemiol.* 1989;129:687-702.
4. Purcell S, Neale B, Todd-Brown K, Thomas L, Ferreira MA, Bender D, Maller J, Sklar P, de Bakker PI, Daly MJ, Sham PC. PLINK: a tool set for whole-genome association and population-based linkage analyses. *Am J Hum Genet.* 2007;81:559-575.
5. Price AL, Patterson NJ, Plenge RM, Weinblatt ME, Shadick NA, Reich D. Principal components analysis corrects for stratification in genome-wide association studies. *Nat Genet.* 2006;38:904-909.
6. Iribarren C, Folsom AR, Eckfeldt JH, McGovern PG, Nieto FJ. Correlates of uric acid and its association with asymptomatic carotid atherosclerosis: the ARIC Study. *Atherosclerosis Risk in Communities.* *Ann Epidemiol.* 1996;6:331-340.
7. Eckfeldt JH, Chambless LE, Shen YL. Short-term, within-person variability in clinical chemistry test results. Experience from the Atherosclerosis Risk in Communities Study. *Arch Pathol Lab Med.* 1994;118:496-500.

8. Fried LP, Borhani NO, Enright P, Furberg CD, Gardin JM, Kronmal RA, Kuller LH, Manolio TA, Mittelmark MB, Newman A, . The Cardiovascular Health Study: design and rationale. *Ann Epidemiol.* 1991;1:263-276.
9. Cushman M, Cornell ES, Howard PR, Bovill EG, Tracy RP. Laboratory methods and quality assurance in the Cardiovascular Health Study. *Clin Chem.* 1995;41:264-270.
10. Psaty BM, Lee M, Savage PJ, Rutan GH, German PS, Lyles M. Assessing the use of medications in the elderly: methods and initial experience in the Cardiovascular Health Study. The Cardiovascular Health Study Collaborative Research Group. *J Clin Epidemiol.* 1992;45:683-692.
11. Sotoodehnia N, Siscovick DS, Vatta M, Psaty BM, Tracy RP, Towbin JA, Lemaitre RN, Rea TD, Durda JP, Chang JM, Lumley TS, Kuller LH, Burke GL, Heckbert SR. Beta2-adrenergic receptor genetic variants and risk of sudden cardiac death. *Circulation.* 2006;113:1842-1848.
12. Dawber TR, Kannel WB, Lyell LP. An approach to longitudinal studies in a community: the Framingham Study. *Ann N Y Acad Sci.* 1963;107:539-556.
13. CROWLEY LV. DETERMINATION OF URIC ACID: AN AUTOMATED ANALYSIS BASED ON A CARBONATE METHOD. *Clin Chem.* 1964;10:838-844.
14. Hofman A, Breteler MM, van Duijn CM, Krestin GP, Pols HA, Stricker BH, Tiemeier H, Uitterlinden AG, Vingerling JR, Witteman JC. The Rotterdam Study: objectives and design update. *Eur J Epidemiol.* 2007;22:819-829.
15. Hofman A, Grobbee DE, de Jong PT, van den Ouweland FA. Determinants of disease and disability in the elderly: the Rotterdam Elderly Study. *Eur J Epidemiol.* 1991;7:403-422.
16. Trivedi RC, Rebar L, Berta E, Stong L. New enzymatic method for serum uric acid at 500 nm. *Clin Chem.* 1978;24:1908-1911.

17. Ridker PM, Chasman DI, Zee RY, Parker A, Rose L, Cook NR, Buring JE. Rationale, design, and methodology of the Women's Genome Health Study: a genome-wide association study of more than 25,000 initially healthy american women. *Clin Chem*. 2008;54:249-255.
18. Ridker PM, Cook NR, Lee IM, Gordon D, Gaziano JM, Manson JE, Hennekens CH, Buring JE. A randomized trial of low-dose aspirin in the primary prevention of cardiovascular disease in women. *N Engl J Med*. 2005;352:1293-1304.
19. Li Y and Abecasis GR. Mach 1.0: Rapid Haplotype Reconstruction and Missing Genotype Inference. *American Journal of Human Genetics* S79 2290. 2006.  
Ref Type: Abstract
20. Meyer TE, Shiffman D, Morrison AC, Rowland CM, Louie JZ, Bare LA, Ross DA, Arellano AR, Chasman DI, Ridker PM, Pankow JS, Coresh J, Malloy MJ, Kane JP, Ellis SG, Devlin JJ, Boerwinkle E. GOSR2 Lys67Arg is associated with hypertension in whites. *Am J Hypertens*. 2009;22:163-168.
21. Servin B, Stephens M. Imputation-based analysis of association studies: candidate regions and quantitative traits. *PLoS Genet*. 2007;3:e114.
22. Devlin B, Roeder K. Genomic control for association studies. *Biometrics*. 1999;55:997-1004.

## Supplementary Tables and Figures

*Table 1s. Study-specific genotyping and analysis information for all cohorts*

| Study                                                    | AGES                                                                                                                             | ARIC                                                | CHS                                                           | FHS                                                                                                              | RS-I and RS-II                                      | WGHS                                                                                 |
|----------------------------------------------------------|----------------------------------------------------------------------------------------------------------------------------------|-----------------------------------------------------|---------------------------------------------------------------|------------------------------------------------------------------------------------------------------------------|-----------------------------------------------------|--------------------------------------------------------------------------------------|
| <b>Array type(s)</b>                                     | Illumina 370CNV                                                                                                                  | Affymetrix 6.0                                      | Illumina 370CNV                                               | Affymetrix 500K, Affymetrix 50K supplemental array                                                               | Illumina 550K                                       | HumanHap300 Duo-Plus chip; combination of the I-Select and the HumanHap300 Duo chips |
| <b>Genotype calling</b>                                  | Illumina BeadStudio                                                                                                              | Birdseed                                            | Illumina BeadStudio                                           | BRLMM                                                                                                            | Illumina BeadStudio                                 | Illumina BeadStudio                                                                  |
| <b>QC filters for genotyped SNPs used for imputation</b> | call rate <97%, pHWE <1E-6, MAF <1%, Mishap p <1E-9, A/T and G/C SNPs, Mismatches between Illumina, dbSNP and/or HapMap position | call rate <95%, MAF<1%, pHWE<1E-5                   | call rate <97%, heterozygotes=0, pHWE<1E-5, SNP not in HapMap | call rate <97%, pHWE<1E-6, Mishap p<1e-9, >100 Mendel errors, MAF<1%, strand Mismatch with HapMap, not in HapMap | call rate <90%, MAF<1%, pHWE<1E-5                   | call rate <90%; pHWE<1E-5; MAF <1%                                                   |
| <b>No of SNPs used for imputation</b>                    | 308,340                                                                                                                          | 602,642                                             | 306,655                                                       | 378,163                                                                                                          | 530,683                                             | 363,808                                                                              |
| <b>Imputation</b>                                        | MACH version 1.0.16                                                                                                              | MACH version 1.0.16                                 | BimBam                                                        | MACH version 1.0.15                                                                                              | MACH version 1.0.15                                 | MACH version 1.0.16                                                                  |
| <b>Imputation Backbone (NCBI build)</b>                  | phased CEU haplotypes, HapMap release 22 (build 36)                                                                              | phased CEU haplotypes, HapMap release 21 (build 35) | HapMap CEU release 21A (build 36)                             | phased CEU haplotypes, HapMap release 22 (build 36)                                                              | phased CEU haplotypes, HapMap release 22 (build 36) | phased CEU haplotypes, HapMap release 21 (build 35)                                  |
| <b>Filtering of imputed genotypes</b>                    | none                                                                                                                             | none                                                | dosage variance < 0.01                                        | none                                                                                                             | none                                                | none                                                                                 |

|                                           |                                                         |                                                                   |                                                  |                                                                                                                                 |                                                            |                                                  |
|-------------------------------------------|---------------------------------------------------------|-------------------------------------------------------------------|--------------------------------------------------|---------------------------------------------------------------------------------------------------------------------------------|------------------------------------------------------------|--------------------------------------------------|
| <b>Statistical analysis and softwares</b> | Linear, logistic and survival regression using PLINK, R | Linear, logistic and survival regression using ProbABEL, PLINK, R | Linear, logistic and survival regression using R | Linear mixed effects model using lmeKin() and in Kinship package and logistic regression models using gee() in GEE package in R | Linear, logistic and survival regression using ProbABEL, R | Linear, logistic and survival regression using R |
|-------------------------------------------|---------------------------------------------------------|-------------------------------------------------------------------|--------------------------------------------------|---------------------------------------------------------------------------------------------------------------------------------|------------------------------------------------------------|--------------------------------------------------|



**Table 2s. Information of the most significant SNPs at loci significantly associated with urate in CHARGE cohorts**

| SNP                                                      | Outcome |                  | AGES         | ARIC         | CHS          | FHS          | RS-I         | RS-II        | Combined     |
|----------------------------------------------------------|---------|------------------|--------------|--------------|--------------|--------------|--------------|--------------|--------------|
| <b>rs13129697</b>                                        |         | MAF*             | 0.23         | 0.28         | 0.28         | 0.28         | 0.25         | 0.26         | 0.27         |
| Chr 4: 9536065<br>Gene: <b>SLC2A9</b>                    | Urate   | p-value          | 5.00E-24     | 1.90E-75     | 7.50E-31     | 1.00E-75     | 4.60E-26     | 7.90E-24     | 1.50E-242    |
|                                                          |         | beta**(se)       | -24.88(2.44) | -23.01(1.24) | -23.42(2.03) | -21.35(1.16) | -18.43(1.74) | -26.34(2.58) | -22.21(0.67) |
| Alleles: G/T                                             |         | R <sup>2</sup> † | 3.15%        | 4.08%        | 2.94%        | 4.98%        | 2.70%        | 1.80%        | 3.70%        |
| Minor allele: G                                          | Gout    | p-value          | 6.30E-02     | 8.00E-08     | 0.048        | 2.40E-04     | 5.10E-03     | 8.40E-02     | 3.70E-13     |
|                                                          |         | OR***            | 0.74         | 0.59         | 0.77         | 0.58         | 0.69         | 0.68         | 0.66         |
|                                                          |         | 95% C.I.         | 0.55-1.02    | 0.49-0.72    | 0.59-1.00    | 0.44-0.78    | 0.53-0.9     | 0.43-1.07    | 0.59-0.74    |
| <b>rs2199936</b>                                         |         | MAF*             | 0.1          | 0.11         | 0.1          | 0.1          | 0.12         | 0.12         | 0.11         |
| Chr 4:89264355<br>Gene: <b>ABCG2</b>                     | Urate   | p-value          | 1.80E-07     | 2.20E-26     | 5.10E-14     | 2.20E-20     | 8.20E-12     | 4.50E-06     | 1.20E-75     |
|                                                          |         | beta**(se)       | 17.76(3.39)  | 19.6(1.84)   | 24.08(3.20)  | 16.4(1.77)   | 16.28(2.38)  | 16.14(3.51)  | 18.08(0.98)  |
| Alleles: A/G                                             |         | R <sup>2</sup> † | 0.85%        | 1.37%        | 1.33%        | 1.28%        | 1.10%        | 0.30%        | 1.20%        |
| Minor allele: A                                          | Gout    | p-value          | 7.80E-02     | 2.80E-08     | 3.70E-08     | 2.00E-06     | 2.70E-04     | 1.00E-01     | 2.60E-23     |
|                                                          |         | OR***            | 1.38         | 1.93         | 2.43         | 1.96         | 1.73         | 1.52         | 1.86         |
|                                                          |         | 95% C.I.         | 0.96-1.97    | 1.55-2.41    | 1.77-3.34    | 1.49-2.59    | 1.31-2.28    | 0.94-2.46    | 1.64-2.10    |
| <b>rs2078267</b>                                         |         | MAF*             | 0.5          | 0.47         | 0.46         | 0.43         | 0.48         | 0.47         | 0.46         |
| Chr 11: 64090690<br>Gene: <b>SLC22A11</b>                | Urate   | p-value          | 2.20E-03     | 5.60E-10     | 5.80E-04     | 4.10E-07     | 2.80E-04     | 1.20E-05     | 2.40E-26     |
|                                                          |         | beta**(se)       | 6.42(2.10)   | 6.94(1.12)   | 6.18(1.8)    | 6.92(1.37)   | 5.53(1.52)   | 10.24(2.34)  | 6.8(0.64)    |
| Alleles: C/T                                             |         | R <sup>2</sup> † | 0.29%        | 0.46%        | 0.26%        | 0.44%        | 0.30%        | 0.30%        | 0.38%        |
| Minor allele: C                                          | Gout    | p-value          | 0.4          | 1.90E-07     | 0.44         | 0.38         | 0.37         | 0.02         | 1.30E-06     |
|                                                          |         | OR***            | 1.11         | 1.52         | 1.1          | 1.13         | 1.1          | 1.51         | 1.26         |
|                                                          |         | 95% C.I.         | 0.87-1.42    | 1.29-1.78    | 0.87-1.39    | 0.86-1.49    | 0.89-1.36    | 1.05-2.16    | 1.14-1.38    |
| <b>rs1165196</b>                                         |         | MAF*             | 0.51         | 0.46         | 0.46         | 0.45         | 0.45         | 0.45         | 0.46         |
| Chr 6:25921129<br>Gene: <b>SLC17A11</b>                  | Urate   | p-value          | 2.60E-03     | 1.70E-08     | 1.80E-04     | 6.80E-10     | 1.20E-02     | 3.00E-04     | 4.95E-25     |
|                                                          |         | beta**(se)       | -6.28(2.09)  | -6.26(1.11)  | -7.00(1.87)  | -6.54(1.06)  | -3.85(1.53)  | -8.34(2.31)  | -6.21(0.60)  |
| Alleles: G/A                                             |         | R <sup>2</sup> † | 0.28%        | 0.38%        | 0.33%        | 0.62%        | 0.20%        | 0.00%        | 0.37%        |
| Minor allele: G                                          | Gout    | p-value          | 0.81         | 0.09         | 0.79         | 0.1          | 0.94         | 0.005        | 0.013        |
|                                                          |         | OR***            | 0.97         | 0.87         | 0.97         | 0.83         | 0.99         | 0.59         | 0.89         |
|                                                          |         | 95% C.I.         | 0.76-1.24    | 0.75-1.02    | 0.76-1.23    | 0.67-1.04    | 0.80-1.22    | 0.41-0.86    | 0.82-0.98    |
| <b>rs780093</b>                                          |         | MAF*             | 0.35         | 0.4          | 0.42         | 0.44         | 0.37         | 0.36         | 0.4          |
| Chr 2: 27596107<br>Gene: <b>GCKR</b>                     | Urate   | p-value          | 1.20E-04     | 4.50E-09     | 6.10E-02     | 2.90E-04     | 3.50E-05     | 7.20E-01     | 3.80E-17     |
|                                                          |         | beta**(se)       | 8.35(2.17)   | 6.72(1.14)   | 3.48(1.85)   | 3.84(1.06)   | 6.58(1.59)   | 0.85(2.37)   | 5.15(0.61)   |
| Alleles: C/T                                             |         | R <sup>2</sup> † | 0.45%        | 0.41%        | 0.08%        | 0.12%        | 0.04%        | 0.20%        | 0.23%        |
| Minor allele: T                                          | Gout    | p-value          | 0.04         | 0.029        | 0.26         | 0.27         | 0.2          | 0.62         | 4.70E-04     |
|                                                          |         | OR***            | 1.29         | 1.19         | 1.15         | 1.12         | 1.15         | 1.09         | 1.17         |
|                                                          |         | 95% C.I.         | 1.01-1.66    | 1.02-1.4     | 0.90-1.46    | 0.91-1.38    | 0.93-1.42    | 0.77-1.56    | 1.07-1.28    |
| <b>rs1106766</b>                                         |         | MAF*             | 0.31         | 0.23         | 0.22         | 0.2          | 0.23         | 0.21         | 0.23         |
| Chr 12: 56095723<br>Gene: <b>R3HDM2;</b><br><b>INHBC</b> | Urate   | p-value          | 1.70E-02     | 3.90E-03     | 3.60E-02     | 3.80E-07     | 3.30E-02     | 2.50E-01     | 1.90E-11     |
|                                                          |         | beta**(se)       | -5.36(2.25)  | -3.83(1.33)  | -5.68(2.70)  | -7.37(1.45)  | -4.25(2.00)  | -3.55(3.12)  | -5.16(0.77)  |
| Alleles: C/T                                             |         | R <sup>2</sup> † | 0.18%        | 0.09%        | 0.10%        | 0.33%        | 0.10%        | 0.00%        | 0.16%        |
| Minor allele: T                                          | Gout    | p-value          | 0.12         | 0.46         | 0.036        | 0.0022       | 0.3          | 0.6          | 7.70E-04     |
|                                                          |         | OR***            | 0.81         | 0.93         | 0.7          | 0.59         | 0.87         | 0.88         | 0.82         |
|                                                          |         | 95% C.I.         | 0.61-1.06    | 0.77-1.13    | 0.49-0.98    | 0.42-0.83    | 0.66-1.14    | 0.53-1.44    | 0.73-0.92    |
| <b>rs675209</b>                                          |         | MAF*             | 0.26         | 0.26         | 0.27         | 0.26         | 0.25         | 0.25         | 0.26         |
| Chr 6: 7047083                                           | Urate   | p-value          | 5.00E-01     | 7.00E-03     | 5.90E-02     | 1.70E-04     | 2.60E-02     | 3.00E-04     | 1.00E-09     |

|                    |       |                  |             |             |             |             |            |            |            |
|--------------------|-------|------------------|-------------|-------------|-------------|-------------|------------|------------|------------|
| Gene: <b>RREB1</b> |       | beta**(se)       | 1.62(2.42)  | 3.71(1.37)  | 4(2.12)     | 4.82(1.28)  | 4.02(1.80) | 9.78(2.70) | 4.39(0.72) |
| Alleles: T/C       |       | R <sup>2</sup> † | 0.01%       | 0.08%       | 0.08%       | 0.23%       | 0.10%      | 0.20%      | 0.12%      |
| Minor allele: T    | Gout  | p-value          | 0.24        | 0.27        | 0.21        | 0.03        | 0.65       | 0.97       | 0.16       |
|                    |       | OR***            | 0.84        | 1.11        | 1.17        | 1.34        | 0.94       | 1.01       | 1.08       |
|                    |       | 95% C.I.         | 0.63-1.13   | 0.92-1.35   | 0.91-1.51   | 1.04-1.74   | 0.74-1.21  | 0.67-1.52  | 0.97-1.20  |
| <b>rs1967017</b>   |       | MAF*             | <i>0.45</i> | <i>0.48</i> | <i>0.49</i> | <i>0.49</i> | 0.45       | 0.45       | 0.47       |
| Chr 1: 144435002   | Urate | p-value          | 5.40E-01    | 6.70E-04    | 7.20E-03    | 2.20E-03    | 7.10E-02   | 2.50E-01   | 3.50E-08   |
| Gene: <b>PDZK1</b> |       | beta**(se)       | 1.29(2.11)  | 3.81(1.12)  | 4.94(1.84)  | 3.24(1.06)  | 2.77(1.54) | 2.74(2.40) | 3.33(0.6)  |
| Alleles: T/C       |       | R <sup>2</sup> † | 0.01%       | 0.13%       | 0.16%       | 0.13%       | 0.07%      | 0.02%      | 0.10%      |
| Minor allele: T    | Gout  | p-value          | 0.46        | 0.43        | 0.99        | 0.13        | 0.06       | 0.92       | 0.96       |
|                    |       | OR***            | 0.91        | 1.07        | 1           | 1.18        | 0.82       | 1.02       | 1          |
|                    |       | 95% C.I.         | 0.71-1.16   | 0.91-1.25   | 0.78-1.28   | 0.95-1.45   | 0.66-1.01  | 0.71-1.47  | 0.92-1.10  |

§SNP location, gene annotation were based on human genome reference sequence of NCBI build 36.2; alleles were called on forward strand.

\*Minor allele is the less common allele of the SNP, and minor allele frequency (MAF) was in combined sample determined using sample size weighted average MAF of all cohorts. MAFs of studies where the SNP was imputed were in italic, and otherwise in regular font.

\*\*beta is the increase of UA (umol/l) per copy increment of the minor allele under an additive model; se is the standard error of the beta coefficient

\*\*\*OR is the odds ratio for gout per per copy increment of the minor allele

All analyses for UA and gout are adjusted for age, sex, BMI, alcohol consumption (all except RS-II), hypertension treatment, (cohort status in FHS, study center in ARIC)

†R<sup>2</sup> is the R-square coefficient for the SNP, i.e. total phenotypic variance explained by the SNP under an additive model.

R<sup>2</sup> in meta analyses was sample size weighted average of the R<sup>2</sup> from individual studies

£SLC17A1 refers to the entire SLC17A4/ SLC17A1/ SLC17A3/SLC17A2 gene cluster

**Table 3s. Information of the most significant SNPs at loci significantly associated with urate in CHARGE cohorts**

| SNP ID Chr: Gene (region) |                    | Imputation Quality* |      |      |      |                   |                    | Other genome-wide significant SNP in the loci† |                             |                                       |                          |      |                  |                       |              |
|---------------------------|--------------------|---------------------|------|------|------|-------------------|--------------------|------------------------------------------------|-----------------------------|---------------------------------------|--------------------------|------|------------------|-----------------------|--------------|
|                           |                    | AGES                | ARIC | CHS  | FHS  | RS-I <sup>§</sup> | RS-II <sup>§</sup> | SNP ID <sup>†</sup>                            | R <sup>2</sup> with Top SNP | No. of Cohorts Genotyped <sup>§</sup> | Minimum Imputation Ratio | MAF  | In Gene (Region) | Distance to Gene (bp) | Meta P-value |
| rs2078267                 | 11: SLC22A11       | -                   | -    | -    | 0.62 | -                 | -                  | rs7936185                                      | 0.48                        | 3                                     | 0.98                     | 0.44 | N                | 17645                 | 4.72E-12     |
| rs780093                  | 2: GCKR            | 1.00                | 1.00 | 1.00 | 1.00 | 1.00              | 1.00               | rs780094                                       | 1.00                        | 5                                     | 1.00                     | 0.40 | Y                |                       | 4.68E-17     |
| rs1106766                 | 12: (R3HDM2-INHBC) | 0.91                | -    | 0.69 | 0.84 | 0.83              | 0.83               | rs4760355                                      | 0.73                        | 2                                     | 0.99                     | 0.24 | (Y)              |                       | 4.71E-11     |
| rs675209                  | 6: RREB1           | -                   | 0.85 | -    | 0.89 | -                 | -                  | rs11755724                                     | 0.55                        | 5                                     | 1.00                     | 0.36 | Y                |                       | 1.42E-08     |
| rs1967017                 | 1: PDZK1           | 1.00                | 0.99 | 0.99 | 1.00 | -                 | -                  | rs10910845                                     | 1.00                        | 4                                     | 0.99                     | 0.47 | N                | 4605                  | 3.89E-08     |
| rs13129697                | 4: SLC2A9          | -                   | 0.98 | -    | 0.98 | -                 | -                  | rs1519098                                      | 0.53                        | 4                                     | 0.99                     | 0.19 | Y                |                       | 3.81E-228    |
| rs2199936                 | 4: ABCG2           | 0.99                | 0.95 | 0.95 | 0.97 | 0.98              | 0.98               | rs2231142                                      | 0.92                        | 4                                     | 0.97                     | 0.11 | Y                |                       | 2.46E-75     |
| rs1165196                 | 6: SLC17A1         | 1.00                | 1.00 | 0.86 | 1.02 | 1.00              | 1.00               | rs3799344                                      | 0.90                        | 3                                     | 0.99                     | 0.45 | Y                |                       | 1.40E-20     |

\*Imputation quality is the ratio between the observed and expected variance of the imputed genotype (range 0 - 1), with >0.9 being considered as best quality, 0.5-0.9 medium quality; and <0.5 bad quality.

Missing values (-) indicated that the SNP is genotyped and passed QC in a cohort.

†One SNP is selected from each locus that reached genomewide significance, in LD with the most significant SNP (R-squared ~0.5 and higher) and had the same or better imputation qualities than the most significant SNP for the cohort with the lowest imputation quality.

§RS-I and RS-II have the same genotyping status for all the SNPs and counted as one cohort.

**Table 4s. Association of genetic urate score with CVD risk factors and CHD in 22,054 individuals from the WGHS**

| phenotype*                          | Genetic Urate Score, per 100 umol/L |                  |         |                        |                  |         |
|-------------------------------------|-------------------------------------|------------------|---------|------------------------|------------------|---------|
|                                     | Age-sex Adjusted                    |                  |         | Multivariable Adjusted |                  |         |
|                                     | Beta (Odds Ratio)                   | 95% CI           | P-value | Beta (Odds Ratio)      | 95% CI           | P-value |
| hypertension incidence              | -0.93                               | 0.78 , 1.11      | 0.43    | -0.81                  | 0.81 , 1.16      | 0.74    |
| SBP (mm Hg)†                        | -0.51                               | -1.6 , 0.57      | 0.35    | -1.33                  | -2.34 , -0.32    | 0.54    |
| DBP (mm Hg)†                        | -0.44                               | -1.15 , 0.27     | 0.22    | -0.97                  | -1.64 , -0.3     | 0.39    |
| SBP (not treated; mmHg)**           | -0.71                               | -1.66 , 0.24     | 0.14    | -1.49                  | -2.98            | 0.2     |
| DBP (not treated; mmHg)**           | -0.72                               | -1.39 , -0.05    | 0.04    | -1.26                  | -2.52            | 0.06    |
| prevalent diabetes                  | -0.63                               | 0.39 , 1.00      | 0.05    | -0.4                   | 0.40 , 1.04      | 0.07    |
| log egfr-Creatinine (ml/min/1.73m2) | -0.0089                             | -0.0081 , 0.0259 | 0.3     | -0.0084                | -0.0255 , 0.0087 | 0.32    |
| CKD                                 | -0.81                               | 0.59 , 1.10      | 0.17    | -0.59                  | 0.59 , 1.10      | 0.17    |
| incident CHD                        | -0.83                               | 0.53 , 1.30      | 0.42    | -0.53                  | 0.53 , 1.32      | 0.43    |

\*includes 5407 cases of incident hypertension, 557 cases of prevalent diabetes, 1333 cases of CKD, and 611 cases of CHD.

†Systolic blood pressure (+10 mm Hg if treated), diastolic blood pressure (+5 mm Hg if treated).

\*\*Individuals taking anti-hypertensive treatment were excluded from this analysis.

*Table 5s. Single SNP association with CVD risk factors and CHD in CHARGE cohorts.*

|                                       |            |                    |              | Multivariable Adjusted |        |                |
|---------------------------------------|------------|--------------------|--------------|------------------------|--------|----------------|
| Phenotype                             | SNPID      | Chr: Gene (region) | coded allele | beta                   | SE     | P-value        |
| <b>SBP</b>                            | rs2078267  | 11: SLC22A11       | C            | 0.028                  | 0.158  | 8.6E-01        |
|                                       | rs780093   | 2: GCKR            | T            | 0.297                  | 0.145  | 4.1E-02        |
|                                       | rs1106766  | 12: (R3HDM2-INHBC) | T            | 0.042                  | 0.184  | 8.2E-01        |
|                                       | rs675209   | 6: RREB1           | T            | -0.125                 | 0.171  | 4.7E-01        |
|                                       | rs1967017  | 1: PDZK1           | T            | 0.052                  | 0.143  | 7.2E-01        |
|                                       | rs13129697 | 4: SLC2A9          | G            | 0.302                  | 0.162  | 6.2E-02        |
|                                       | rs2199936  | 4: ABCG2           | A            | -0.483                 | 0.235  | 4.0E-02        |
|                                       | rs1165196  | 6: SLC17A1         | G            | -0.090                 | 0.142  | 5.3E-01        |
| <b>DBP</b>                            | rs2078267  | 11: SLC22A11       | C            | 0.068                  | 0.089  | 4.5E-01        |
|                                       | rs780093   | 2: GCKR            | T            | 0.172                  | 0.085  | 4.3E-02        |
|                                       | rs1106766  | 12: (R3HDM2-INHBC) | T            | 0.059                  | 0.107  | 5.9E-01        |
|                                       | rs675209   | 6: RREB1           | T            | -0.001                 | 0.100  | 9.9E-01        |
|                                       | rs1967017  | 1: PDZK1           | T            | 0.008                  | 0.084  | 9.2E-01        |
|                                       | rs13129697 | 4: SLC2A9          | G            | 0.061                  | 0.095  | 5.2E-01        |
|                                       | rs2199936  | 4: ABCG2           | A            | -0.178                 | 0.138  | 2.0E-01        |
|                                       | rs1165196  | 6: SLC17A1         | G            | -0.048                 | 0.084  | 5.7E-01        |
| <b>SBP<br/>(exclude treated)</b>      | rs2078267  | 11: SLC22A11       | C            | 0.032                  | 0.164  | 8.5E-01        |
|                                       | rs780093   | 2: GCKR            | T            | 0.265                  | 0.150  | 7.6E-02        |
|                                       | rs1106766  | 12: (R3HDM2-INHBC) | T            | 0.182                  | 0.192  | 3.4E-01        |
|                                       | rs675209   | 6: RREB1           | T            | -0.310                 | 0.178  | 8.0E-02        |
|                                       | rs1967017  | 1: PDZK1           | T            | 0.074                  | 0.148  | 6.2E-01        |
|                                       | rs13129697 | 4: SLC2A9          | G            | 0.272                  | 0.166  | 1.0E-01        |
|                                       | rs2199936  | 4: ABCG2           | A            | -0.454                 | 0.242  | 6.1E-02        |
|                                       | rs1165196  | 6: SLC17A1         | G            | 0.015                  | 0.147  | 9.2E-01        |
| <b>DBP<br/>(exclude treated)</b>      | rs2078267  | 11: SLC22A11       | C            | 0.064                  | 0.099  | 5.2E-01        |
|                                       | rs780093   | 2: GCKR            | T            | 0.181                  | 0.093  | 5.1E-02        |
|                                       | rs1106766  | 12: (R3HDM2-INHBC) | T            | 0.146                  | 0.118  | 2.2E-01        |
|                                       | rs675209   | 6: RREB1           | T            | -0.153                 | 0.110  | 1.6E-01        |
|                                       | rs1967017  | 1: PDZK1           | T            | -0.002                 | 0.092  | 9.9E-01        |
|                                       | rs13129697 | 4: SLC2A9          | G            | 0.092                  | 0.103  | 3.7E-01        |
|                                       | rs2199936  | 4: ABCG2           | A            | -0.184                 | 0.149  | 2.2E-01        |
|                                       | rs1165196  | 6: SLC17A1         | G            | -0.004                 | 0.091  | 9.7E-01        |
| <b>glucose</b>                        | rs2078267  | 11: SLC22A11       | C            | -0.006                 | 0.011  | 5.8E-01        |
|                                       | rs780093   | 2: GCKR            | T            | -0.031                 | 0.010  | 1.7E-03        |
|                                       | rs1106766  | 12: (R3HDM2-INHBC) | T            | 0.016                  | 0.013  | 2.2E-01        |
|                                       | rs675209   | 6: RREB1           | T            | -0.002                 | 0.012  | 8.8E-01        |
|                                       | rs1967017  | 1: PDZK1           | T            | 0.016                  | 0.010  | 1.0E-01        |
|                                       | rs13129697 | 4: SLC2A9          | G            | 0.007                  | 0.011  | 5.1E-01        |
|                                       | rs2199936  | 4: ABCG2           | A            | -0.007                 | 0.016  | 6.7E-01        |
|                                       | rs1165196  | 6: SLC17A1         | G            | 0.003                  | 0.010  | 7.3E-01        |
| <b>glucose<br/>(exclude diabetes)</b> | rs2078267  | 11: SLC22A11       | C            | -0.0056                | 0.0050 | 2.6E-01        |
|                                       | rs780093   | 2: GCKR            | T            | -0.0259                | 0.0047 | <b>2.8E-08</b> |
|                                       | rs1106766  | 12: (R3HDM2-INHBC) | T            | -0.0031                | 0.0059 | 6.0E-01        |
|                                       | rs675209   | 6: RREB1           | T            | 0.0032                 | 0.0055 | 5.7E-01        |
|                                       | rs1967017  | 1: PDZK1           | T            | 0.0065                 | 0.0046 | 1.6E-01        |

|                                       |            |                    |   |         |        |                |
|---------------------------------------|------------|--------------------|---|---------|--------|----------------|
|                                       | rs13129697 | 4: SLC2A9          | G | -0.0012 | 0.0052 | 8.2E-01        |
|                                       | rs2199936  | 4: ABCG2           | A | 0.0158  | 0.0077 | 4.0E-02        |
|                                       | rs1165196  | 6: SLC17A1         | G | 0.0006  | 0.0046 | 8.9E-01        |
| <b>Insulin<br/>(exclude diabetes)</b> | rs2078267  | 11: SLC22A11       | C | -0.0307 | 0.1259 | 8.1E-01        |
|                                       | rs780093   | 2: GCKR            | T | -0.2930 | 0.1186 | 1.3E-02        |
|                                       | rs1106766  | 12: (R3HDM2-INHBC) | T | -0.1667 | 0.1645 | 3.1E-01        |
|                                       | rs675209   | 6: RREB1           | T | 0.0287  | 0.1353 | 8.3E-01        |
|                                       | rs1967017  | 1: PDZK1           | T | 0.0115  | 0.1243 | 9.3E-01        |
|                                       | rs13129697 | 4: SLC2A9          | G | -0.0043 | 0.1417 | 9.8E-01        |
|                                       | rs2199936  | 4: ABCG2           | A | 0.2736  | 0.2140 | 2.0E-01        |
|                                       | rs1165196  | 6: SLC17A1         | G | 0.0263  | 0.1176 | 8.2E-01        |
| <b>log-GFR<br/>Creatinine</b>         | rs2078267  | 11: SLC22A11       | C | 0.0030  | 0.0020 | 1.4E-01        |
|                                       | rs780093   | 2: GCKR            | T | 0.0061  | 0.0020 | 2.5E-03        |
|                                       | rs1106766  | 12: (R3HDM2-INHBC) | T | 0.0109  | 0.0025 | <b>1.3E-05</b> |
|                                       | rs675209   | 6: RREB1           | T | 0.0083  | 0.0024 | <b>4.6E-04</b> |
|                                       | rs1967017  | 1: PDZK1           | T | 0.0023  | 0.0020 | 2.5E-01        |
|                                       | rs13129697 | 4: SLC2A9          | G | 0.0014  | 0.0023 | 5.5E-01        |
|                                       | rs2199936  | 4: ABCG2           | A | -0.0008 | 0.0032 | 8.1E-01        |
|                                       | rs1165196  | 6: SLC17A1         | G | 0.0013  | 0.0020 | 5.1E-01        |
| <b>CKD</b>                            | rs2078267  | 11: SLC22A11       | C | -0.0159 | 0.0294 | 5.9E-01        |
|                                       | rs780093   | 2: GCKR            | T | -0.0007 | 0.0298 | 9.8E-01        |
|                                       | rs1106766  | 12: (R3HDM2-INHBC) | T | -0.0019 | 0.0041 | 6.4E-01        |
|                                       | rs675209   | 6: RREB1           | T | -0.0270 | 0.0344 | 4.3E-01        |
|                                       | rs1967017  | 1: PDZK1           | T | 0.0169  | 0.0290 | 5.6E-01        |
|                                       | rs13129697 | 4: SLC2A9          | G | -0.0350 | 0.0336 | 3.0E-01        |
|                                       | rs2199936  | 4: ABCG2           | A | 0.0593  | 0.0469 | 2.1E-01        |
|                                       | rs1165196  | 6: SLC17A1         | G | -0.0111 | 0.0292 | 7.0E-01        |
| <b>CHD</b>                            | rs2078267  | 11: SLC22A11       | C | 0.0166  | 0.0256 | 5.2E-01        |
|                                       | rs780093   | 2: GCKR            | T | 0.0156  | 0.0262 | 5.5E-01        |
|                                       | rs1106766  | 12: (R3HDM2-INHBC) | T | -0.0046 | 0.0058 | 4.3E-01        |
|                                       | rs675209   | 6: RREB1           | T | 0.0600  | 0.0299 | 4.5E-02        |
|                                       | rs1967017  | 1: PDZK1           | T | -0.0004 | 0.0257 | 9.9E-01        |
|                                       | rs13129697 | 4: SLC2A9          | G | 0.0213  | 0.0289 | 4.6E-01        |
|                                       | rs2199936  | 4: ABCG2           | A | 0.0262  | 0.0417 | 5.3E-01        |
|                                       | rs1165196  | 6: SLC17A1         | G | 0.0013  | 0.0255 | 9.6E-01        |

\***Bold P-values indicate the result is significant at alpha=0.0016, corresponding to a Bonferroni corrected alpha of 0.05, for 4 trait classes (BP, glucose, CKD, CHD) and 8 SNPs.**

**Table 6s. SNPs associated with serum urate (p-value  $\leq 4e-7$ ) in meta analyses of CHARGE cohorts**

| Chr | SNP ID     | Allele | Position  | Beta   | P       | In RefGene | RefGenes within 60kb                                      |
|-----|------------|--------|-----------|--------|---------|------------|-----------------------------------------------------------|
| 1   | rs10910845 | A      | 144434477 | 3.312  | 3.9E-08 |            | CD160;GPR89A;ZNF364;PDZK1                                 |
| 1   | rs1967017  | T      | 144435002 | 3.327  | 3.5E-08 |            | CD160;GPR89A;ZNF364;PDZK1                                 |
| 1   | rs1471633  | A      | 144435096 | 3.330  | 3.6E-08 |            | CD160;GPR89A;ZNF364;PDZK1                                 |
| 2   | rs1049817  | A      | 27404471  | 3.324  | 1.2E-07 | GTF3C2     | SNX17;UCN;ZNF513;GTF3C2;MPV17;EIF2B4;PPM1G;TRIM54;DNAJC5G |
| 2   | rs3739095  | A      | 27410225  | -3.988 | 1.4E-10 | GTF3C2     | SNX17;UCN;ZNF513;GTF3C2;MPV17;EIF2B4;PPM1G;TRIM54;DNAJC5G |
| 2   | rs11684134 | A      | 27411756  | 3.656  | 7.1E-09 | GTF3C2     | SNX17;UCN;ZNF513;GTF3C2;MPV17;EIF2B4;PPM1G;TRIM54;DNAJC5G |
| 2   | rs6743819  | T      | 27420911  | -3.299 | 1.4E-07 | GTF3C2     | SNX17;UCN;ZNF513;GTF3C2;MPV17;EIF2B4;PPM1G;TRIM54         |
| 2   | rs10205219 | T      | 27422069  | 3.297  | 1.4E-07 | GTF3C2     | SNX17;UCN;ZNF513;GTF3C2;MPV17;EIF2B4;PPM1G;TRIM54         |
| 2   | rs4665969  | T      | 27428457  | 3.298  | 1.3E-07 | GTF3C2     | SNX17;UCN;ZNF513;GTF3C2;MPV17;EIF2B4;PPM1G;TRIM54         |
| 2   | rs6760828  | T      | 27432735  | 3.307  | 1.2E-07 | GTF3C2     | SNX17;UCN;ZNF513;GTF3C2;MPV17;EIF2B4;PPM1G;TRIM54         |
| 2   | rs7586601  | A      | 27438170  | 3.915  | 2.8E-10 |            | SNX17;UCN;ZNF513;GTF3C2;MPV17;EIF2B4;PPM1G;TRIM54         |
| 2   | rs2280737  | T      | 27443314  | 3.224  | 2.5E-07 | EIF2B4     | SNX17;UCN;ZNF513;GTF3C2;MPV17;EIF2B4;PPM1G;TRIM54         |
| 2   | rs7602534  | T      | 27445927  | -3.184 | 3.4E-07 | EIF2B4     | SNX17;ZNF513;GTF3C2;MPV17;NRBP1;EIF2B4;PPM1G              |
| 2   | rs1528533  | C      | 27449260  | -3.240 | 1.9E-07 | SNX17      | SNX17;ZNF513;GTF3C2;MPV17;NRBP1;EIF2B4;PPM1G              |
| 2   | rs13472    | A      | 27453743  | -3.237 | 2.2E-07 | ZNF513     | SNX17;ZNF513;GTF3C2;MPV17;NRBP1;EIF2B4;PPM1G              |
| 2   | rs1647284  | T      | 27461619  | -3.261 | 1.7E-07 | PPM1G      | SNX17;KRTCAP3;ZNF513;IFT172;GTF3C2;NRBP1;EIF2B4;PPM1G     |
| 2   | rs7594812  | A      | 27464973  | 3.264  | 1.6E-07 | PPM1G      | SNX17;KRTCAP3;ZNF513;IFT172;GTF3C2;NRBP1;EIF2B4;PPM1G     |
| 2   | rs12476704 | A      | 27466535  | -3.276 | 1.6E-07 | PPM1G      | SNX17;KRTCAP3;ZNF513;IFT172;GTF3C2;NRBP1;EIF2B4;PPM1G     |
| 2   | rs2911712  | A      | 27480449  | 3.285  | 1.3E-07 | PPM1G      | SNX17;KRTCAP3;ZNF513;IFT172;GTF3C2;NRBP1;EIF2B4;PPM1G     |
| 2   | rs7563162  | T      | 27484695  | -3.287 | 1.3E-07 | PPM1G      | SNX17;KRTCAP3;ZNF513;IFT172;GTF3C2;NRBP1;EIF2B4;PPM1G     |
| 2   | rs1060525  | A      | 27489086  | 3.264  | 1.6E-07 |            | SNX17;KRTCAP3;ZNF513;IFT172;GTF3C2;NRBP1;EIF2B4;PPM1G     |
| 2   | rs2010087  | T      | 27490739  | -3.297 | 1.3E-07 |            | SNX17;KRTCAP3;ZNF513;IFT172;GTF3C2;NRBP1;EIF2B4;PPM1G     |
| 2   | rs4665976  | A      | 27493829  | 3.288  | 1.3E-07 |            | SNX17;KRTCAP3;ZNF513;IFT172;NRBP1;EIF2B4;PPM1G            |
| 2   | rs1728922  | A      | 27497968  | 3.296  | 1.2E-07 |            | SNX17;KRTCAP3;ZNF513;IFT172;NRBP1;EIF2B4;PPM1G            |
| 2   | rs6547626  | T      | 27500274  | -3.301 | 1.1E-07 |            | SNX17;KRTCAP3;ZNF513;IFT172;NRBP1;EIF2B4;PPM1G            |
| 2   | rs4665978  | T      | 27502230  | 3.943  | 1.8E-10 |            | SNX17;KRTCAP3;ZNF513;IFT172;NRBP1;EIF2B4;PPM1G            |
| 2   | rs780100   | T      | 27505657  | -3.438 | 3.4E-08 | NRBP1      | SNX17;KRTCAP3;ZNF513;IFT172;NRBP1;EIF2B4;PPM1G            |
| 2   | rs704791   | T      | 27510671  | 3.424  | 3.9E-08 | NRBP1      | SNX17;KRTCAP3;ZNF513;IFT172;FNDC4;NRBP1;PPM1G             |
| 2   | rs780102   | T      | 27512995  | 3.441  | 3.3E-08 | NRBP1      | SNX17;KRTCAP3;ZNF513;IFT172;FNDC4;NRBP1;PPM1G             |
| 2   | rs1260341  | A      | 27516719  | -3.444 | 3.2E-08 | NRBP1      | GCKR;KRTCAP3;ZNF513;IFT172;FNDC4;NRBP1;PPM1G              |
| 2   | rs1260342  | T      | 27516920  | -3.443 | 3.2E-08 | NRBP1      | GCKR;KRTCAP3;ZNF513;IFT172;FNDC4;NRBP1;PPM1G              |
| 2   | rs4803     | A      | 27520801  | 3.455  | 2.9E-08 | IFT172     | GCKR;KRTCAP3;IFT172;FNDC4;NRBP1;PPM1G                     |
| 2   | rs780104   | A      | 27531195  | -3.453 | 2.9E-08 | IFT172     | GCKR;KRTCAP3;IFT172;FNDC4;NRBP1;PPM1G                     |
| 2   | rs780106   | A      | 27535102  | 3.449  | 3.1E-08 | IFT172     | GCKR;KRTCAP3;IFT172;FNDC4;NRBP1;PPM1G                     |
| 2   | rs780107   | A      | 27538238  | 3.457  | 2.9E-08 | IFT172     | GCKR;KRTCAP3;IFT172;FNDC4;NRBP1;PPM1G                     |
| 2   | rs780110   | A      | 27538892  | -4.080 | 3.8E-11 | IFT172     | GCKR;KRTCAP3;IFT172;FNDC4;NRBP1;PPM1G                     |
| 2   | rs1647276  | T      | 27542105  | -3.462 | 2.7E-08 | IFT172     | GCKR;KRTCAP3;IFT172;FNDC4;NRBP1;PPM1G                     |
| 2   | rs1647266  | T      | 27546989  | 3.456  | 2.8E-08 | IFT172     | GCKR;KRTCAP3;IFT172;FNDC4;NRBP1                           |
| 2   | rs780117   | C      | 27551847  | 3.466  | 2.6E-08 | IFT172     | GCKR;KRTCAP3;IFT172;FNDC4;NRBP1                           |
| 2   | rs2303369  | T      | 27568920  | -3.496 | 2.3E-08 | FNDC4      | GCKR;KRTCAP3;IFT172;FNDC4;NRBP1                           |
| 2   | rs704795   | A      | 27569998  | -3.506 | 1.9E-08 | FNDC4      | GCKR;KRTCAP3;IFT172;FNDC4;NRBP1                           |
| 2   | rs813592   | T      | 27575475  | 3.549  | 1.3E-08 | GCKR       | GCKR;KRTCAP3;IFT172;FNDC4;NRBP1                           |
| 2   | rs1260320  | A      | 27575920  | -3.551 | 1.2E-08 | GCKR       | GCKR;KRTCAP3;IFT172;FNDC4;NRBP1                           |
| 2   | rs2293572  | C      | 27582281  | 3.560  | 1.1E-08 | GCKR       | GCKR;IFT172;FNDC4                                         |
| 2   | rs2293571  | A      | 27582984  | -3.544 | 1.3E-08 | GCKR       | GCKR;IFT172;FNDC4                                         |
| 2   | rs1260326  | T      | 27584444  | 5.152  | 5.9E-17 | GCKR       | GCKR;IFT172;FNDC4                                         |
| 2   | rs4425043  | A      | 27586956  | -3.559 | 1.2E-08 | GCKR       | GCKR;IFT172;FNDC4                                         |
| 2   | rs780094   | T      | 27594741  | 5.128  | 4.7E-17 | GCKR       | GCKR;IFT172;FNDC4;C2orf16                                 |
| 2   | rs780093   | T      | 27596107  | 5.147  | 3.8E-17 | GCKR       | GCKR;IFT172;FNDC4;C2orf16                                 |
| 2   | rs11681351 | A      | 27596927  | -3.506 | 1.6E-08 | GCKR       | GCKR;IFT172;FNDC4;C2orf16                                 |

|   |            |   |          |        |         |                                  |
|---|------------|---|----------|--------|---------|----------------------------------|
| 2 | rs8179252  | A | 27600336 | 3.515  | 1.5E-08 | GCKR;IFT172;ZNF512;FNDC4;C2orf16 |
| 2 | rs1260333  | A | 27602128 | 4.404  | 4.3E-13 | GCKR;IFT172;ZNF512;FNDC4;C2orf16 |
| 2 | rs2911711  | A | 27604050 | -4.416 | 4.1E-13 | GCKR;IFT172;ZNF512;FNDC4;C2orf16 |
| 2 | rs4665987  | A | 27609329 | 3.487  | 3.9E-07 | GCKR;IFT172;ZNF512;FNDC4;C2orf16 |
| 4 | rs12513044 | A | 9115776  | -4.789 | 6.5E-10 | LOC650293;DEFB131                |
| 4 | rs11722359 | A | 9117312  | -4.798 | 5.9E-10 | LOC650293;DEFB131                |
| 4 | rs2127796  | T | 9119930  | 4.883  | 4.0E-10 | LOC650293;DEFB131                |
| 4 | rs6448742  | T | 9151857  | 8.004  | 2.1E-07 | LOC650293                        |
| 4 | rs12233771 | A | 9162063  | 4.655  | 1.3E-09 |                                  |
| 4 | rs13110253 | T | 9167654  | 4.622  | 3.6E-10 |                                  |
| 4 | rs10013288 | A | 9168316  | 8.602  | 2.0E-08 |                                  |
| 4 | rs2170252  | A | 9169160  | -8.604 | 2.0E-08 |                                  |
| 4 | rs13117722 | T | 9170737  | -8.606 | 2.0E-08 |                                  |
| 4 | rs13116764 | A | 9170857  | -4.708 | 1.5E-10 |                                  |
| 4 | rs13131681 | A | 9173028  | -8.735 | 1.2E-08 |                                  |
| 4 | rs6448816  | T | 9173582  | -9.342 | 8.7E-09 |                                  |
| 4 | rs12646317 | A | 9174936  | -9.762 | 1.6E-09 |                                  |
| 4 | rs4102942  | T | 9177576  | 4.631  | 1.8E-10 |                                  |
| 4 | rs1825043  | A | 9182838  | 7.310  | 4.7E-08 |                                  |
| 4 | rs13138961 | T | 9194245  | 5.491  | 1.0E-14 |                                  |
| 4 | rs12512447 | A | 9195411  | 5.839  | 6.6E-17 |                                  |
| 4 | rs1811570  | A | 9197097  | -7.555 | 3.3E-08 |                                  |
| 4 | rs6824806  | T | 9198525  | 7.248  | 5.3E-08 |                                  |
| 4 | rs6815602  | T | 9201191  | 5.858  | 5.9E-16 |                                  |
| 4 | rs16898588 | T | 9204849  | -6.038 | 1.0E-08 |                                  |
| 4 | rs6448858  | T | 9205016  | -6.988 | 1.3E-07 |                                  |
| 4 | rs4974823  | A | 9211817  | -9.421 | 8.8E-10 |                                  |
| 4 | rs12509677 | A | 9211822  | -6.047 | 9.1E-09 |                                  |
| 4 | rs13103207 | T | 9212770  | 7.382  | 1.5E-17 |                                  |
| 4 | rs2077679  | A | 9217187  | -9.531 | 4.9E-10 |                                  |
| 4 | rs4974853  | C | 9218213  | -9.566 | 4.2E-10 |                                  |
| 4 | rs7375281  | T | 9218604  | -9.568 | 4.2E-10 |                                  |
| 4 | rs11724183 | A | 9218992  | 9.626  | 3.3E-10 |                                  |
| 4 | rs4974812  | A | 9223696  | 9.629  | 3.3E-10 |                                  |
| 4 | rs11735475 | T | 9224024  | -9.631 | 3.3E-10 |                                  |
| 4 | rs6838199  | C | 9230431  | 20.820 | 5.6E-09 |                                  |
| 4 | rs6837106  | T | 9235402  | -9.601 | 3.4E-10 |                                  |
| 4 | rs10049735 | T | 9235507  | 5.659  | 8.8E-08 |                                  |
| 4 | rs10005684 | T | 9235995  | -9.673 | 2.5E-10 |                                  |
| 4 | rs9998663  | T | 9236151  | 9.673  | 2.5E-10 |                                  |
| 4 | rs13151183 | A | 9236164  | 6.022  | 1.3E-16 |                                  |
| 4 | rs13107086 | T | 9237186  | 6.017  | 1.3E-16 |                                  |
| 4 | rs10939427 | A | 9237636  | 9.654  | 2.5E-10 |                                  |
| 4 | rs7698775  | T | 9238149  | 32.289 | 3.0E-11 |                                  |
| 4 | rs7693695  | A | 9238478  | -6.014 | 1.2E-16 |                                  |
| 4 | rs11939895 | T | 9239500  | -9.601 | 2.5E-10 |                                  |
| 4 | rs9291589  | C | 9242508  | -9.589 | 2.6E-10 |                                  |
| 4 | rs6842855  | T | 9243088  | -9.571 | 3.0E-10 |                                  |
| 4 | rs11731624 | A | 9246706  | -9.565 | 3.1E-10 |                                  |
| 4 | rs11737243 | T | 9250370  | -9.559 | 3.1E-10 |                                  |
| 4 | rs11733687 | T | 9252472  | 5.693  | 7.4E-14 |                                  |
| 4 | rs10939436 | T | 9256233  | -9.521 | 3.6E-10 |                                  |
| 4 | rs7440232  | T | 9260842  | -9.536 | 3.5E-10 |                                  |
| 4 | rs7654169  | T | 9263169  | -9.501 | 3.8E-10 |                                  |
| 4 | rs6812811  | T | 9281098  | -9.459 | 4.4E-10 |                                  |



|   |            |   |         |        |         |             |
|---|------------|---|---------|--------|---------|-------------|
| 4 | rs7434744  | A | 9281786 | -9.462 | 4.4E-10 |             |
| 4 | rs10002984 | T | 9289831 | -9.447 | 4.8E-10 |             |
| 4 | rs6858093  | A | 9290748 | 7.996  | 5.0E-08 |             |
| 4 | rs13104360 | A | 9293902 | 9.445  | 4.5E-10 |             |
| 4 | rs7671092  | T | 9296539 | 7.544  | 1.4E-08 |             |
| 4 | rs7658414  | T | 9297067 | 4.405  | 2.2E-07 |             |
| 4 | rs7691759  | T | 9297112 | -4.408 | 2.2E-07 |             |
| 4 | rs6821253  | T | 9299829 | -5.862 | 1.4E-16 |             |
| 4 | rs10022012 | A | 9302280 | 4.289  | 2.1E-08 |             |
| 4 | rs7678732  | T | 9302351 | -9.133 | 9.7E-10 |             |
| 4 | rs12649073 | A | 9303588 | 4.299  | 1.2E-07 |             |
| 4 | rs13103452 | T | 9303760 | -5.827 | 1.9E-16 |             |
| 4 | rs4554078  | A | 9310642 | -8.476 | 7.3E-09 |             |
| 4 | rs10805313 | T | 9312159 | -8.246 | 1.5E-08 |             |
| 4 | rs9685887  | T | 9315440 | -8.102 | 2.4E-08 |             |
| 4 | rs9291607  | C | 9317896 | 8.188  | 1.8E-08 |             |
| 4 | rs6858393  | T | 9318675 | -3.980 | 1.9E-09 |             |
| 4 | rs13136075 | A | 9324066 | 4.846  | 1.9E-15 |             |
| 4 | rs6448974  | A | 9324203 | -8.308 | 1.1E-08 |             |
| 4 | rs9684176  | T | 9325484 | -4.832 | 2.1E-15 |             |
| 4 | rs12501880 | T | 9327073 | 4.858  | 1.7E-15 |             |
| 4 | rs11730320 | T | 9328999 | 6.180  | 2.0E-16 |             |
| 4 | rs11727674 | T | 9329079 | -3.830 | 4.8E-08 |             |
| 4 | rs11724606 | A | 9329542 | -6.543 | 3.9E-11 |             |
| 4 | rs7659176  | A | 9330164 | -8.381 | 4.5E-09 |             |
| 4 | rs10939472 | C | 9330714 | 8.326  | 4.9E-09 |             |
| 4 | rs13121465 | T | 9331373 | -5.687 | 7.6E-17 |             |
| 4 | rs13136217 | T | 9331390 | 8.321  | 5.2E-09 |             |
| 4 | rs13128435 | A | 9332770 | -5.394 | 1.0E-15 | DRD5        |
| 4 | rs2037313  | T | 9333809 | -8.313 | 5.3E-09 | DRD5        |
| 4 | rs7685513  | A | 9337697 | -8.327 | 4.7E-09 | DRD5        |
| 4 | rs13127001 | A | 9340313 | 5.411  | 8.3E-16 | DRD5        |
| 4 | rs6811848  | A | 9341259 | 8.264  | 6.7E-09 | DRD5        |
| 4 | rs10007469 | C | 9341841 | 8.383  | 1.4E-08 | DRD5        |
| 4 | rs7684214  | T | 9343683 | -8.266 | 6.7E-09 | DRD5        |
| 4 | rs7675599  | A | 9345614 | 8.295  | 6.1E-09 | DRD5        |
| 4 | rs6448981  | C | 9349423 | 5.319  | 3.3E-14 | DRD5        |
| 4 | rs1818670  | C | 9354488 | 8.296  | 5.9E-09 | DRD5        |
| 4 | rs6834270  | A | 9365808 | 12.018 | 9.3E-10 | DRD5        |
| 4 | rs6834697  | A | 9366012 | -8.201 | 4.7E-08 | DRD5        |
| 4 | rs11727873 | T | 9367567 | 5.463  | 1.7E-11 | DRD5        |
| 4 | rs10011621 | A | 9369337 | 5.457  | 9.8E-12 | DRD5        |
| 4 | rs13140817 | A | 9372073 | 5.250  | 3.4E-15 | DRD5        |
| 4 | rs11733815 | A | 9373380 | -8.144 | 5.3E-08 | DRD5        |
| 4 | rs11734974 | T | 9373662 | -7.642 | 2.3E-07 | DRD5        |
| 4 | rs11729600 | T | 9373784 | -8.139 | 5.3E-08 | DRD5        |
| 4 | rs7655090  | A | 9374973 | 4.577  | 3.6E-12 | DRD5        |
| 4 | rs11731100 | A | 9376278 | -5.760 | 1.3E-19 | DRD5        |
| 4 | rs10939504 | A | 9376468 | -8.049 | 7.0E-08 | DRD5        |
| 4 | rs11732272 | A | 9377356 | 6.995  | 6.3E-15 | SLC2A9;DRD5 |
| 4 | rs10939507 | T | 9377921 | -8.007 | 7.9E-08 | SLC2A9;DRD5 |
| 4 | rs10939514 | T | 9382294 | 8.028  | 7.6E-08 | SLC2A9;DRD5 |
| 4 | rs10939515 | A | 9382394 | -6.144 | 2.1E-13 | SLC2A9;DRD5 |
| 4 | rs10033951 | T | 9388678 | -4.511 | 4.0E-12 | SLC2A9;DRD5 |
| 4 | rs2867383  | A | 9397033 | -4.522 | 3.5E-12 | SLC2A9;DRD5 |

|   |            |   |         |        |         |             |
|---|------------|---|---------|--------|---------|-------------|
| 4 | rs1850744  | T | 9399810 | -7.884 | 1.3E-07 | SLC2A9;DRD5 |
| 4 | rs7685396  | A | 9403822 | 5.590  | 2.2E-18 | SLC2A9;DRD5 |
| 4 | rs1850739  | T | 9406441 | -7.872 | 1.4E-07 | SLC2A9;DRD5 |
| 4 | rs13106539 | T | 9406801 | 5.657  | 2.6E-19 | SLC2A9;DRD5 |
| 4 | rs2139240  | T | 9407190 | 28.833 | 2.5E-09 | SLC2A9;DRD5 |
| 4 | rs6449000  | A | 9407710 | 7.858  | 1.5E-07 | SLC2A9;DRD5 |
| 4 | rs2280207  | T | 9408874 | -5.658 | 2.7E-19 | SLC2A9;DRD5 |
| 4 | rs2280208  | A | 9409141 | -7.783 | 1.9E-07 | SLC2A9;DRD5 |
| 4 | rs938556   | A | 9411464 | -7.816 | 1.7E-07 | SLC2A9;DRD5 |
| 4 | rs1519097  | A | 9411951 | 4.631  | 9.9E-13 | SLC2A9;DRD5 |
| 4 | rs1533615  | T | 9413622 | -7.795 | 1.8E-07 | SLC2A9;DRD5 |
| 4 | rs1519096  | T | 9414970 | 5.772  | 2.0E-13 | SLC2A9;DRD5 |
| 4 | rs7664572  | T | 9417807 | -7.913 | 1.2E-07 | SLC2A9;DRD5 |
| 4 | rs12500086 | A | 9418957 | 5.722  | 2.5E-13 | SLC2A9;DRD5 |
| 4 | rs1519095  | C | 9420029 | 7.900  | 1.3E-07 | SLC2A9;DRD5 |
| 4 | rs2280333  | A | 9420231 | 5.778  | 5.0E-20 | SLC2A9;DRD5 |
| 4 | rs1401438  | A | 9423554 | -6.442 | 4.9E-15 | SLC2A9;DRD5 |
| 4 | rs13148356 | A | 9426168 | 5.782  | 4.0E-20 | SLC2A9;DRD5 |
| 4 | rs1519094  | T | 9426384 | -7.925 | 1.3E-07 | SLC2A9;DRD5 |
| 4 | rs13141706 | T | 9427443 | -6.079 | 3.4E-21 | SLC2A9;DRD5 |
| 4 | rs6855095  | A | 9429075 | -6.286 | 5.1E-23 | SLC2A9;DRD5 |
| 4 | rs1107912  | A | 9429277 | -6.104 | 6.0E-22 | SLC2A9;DRD5 |
| 4 | rs4697892  | A | 9432935 | -8.119 | 5.1E-28 | SLC2A9;DRD5 |
| 4 | rs1980220  | A | 9433734 | -8.064 | 2.1E-28 | SLC2A9;DRD5 |
| 4 | rs4697893  | T | 9435281 | 19.164 | 1.7E-08 | SLC2A9;DRD5 |
| 4 | rs6822889  | T | 9435855 | 6.212  | 4.3E-23 | SLC2A9;DRD5 |
| 4 | rs4621429  | A | 9435968 | 8.038  | 1.8E-28 | SLC2A9;DRD5 |
| 4 | rs4697895  | T | 9437582 | 7.973  | 4.1E-28 | SLC2A9;DRD5 |
| 4 | rs1401440  | T | 9441610 | 6.199  | 4.4E-23 | SLC2A9;DRD5 |
| 4 | rs1464258  | T | 9443205 | 6.173  | 5.7E-23 | SLC2A9;DRD5 |
| 4 | rs16889260 | T | 9443994 | -9.085 | 7.3E-32 | SLC2A9;DRD5 |
| 4 | rs12505312 | C | 9446188 | 8.042  | 2.1E-28 | SLC2A9;DRD5 |
| 4 | rs10939552 | A | 9447646 | -8.055 | 2.0E-28 | SLC2A9;DRD5 |
| 4 | rs1914874  | A | 9448588 | -6.200 | 2.0E-21 | SLC2A9;DRD5 |
| 4 | rs10031303 | A | 9450788 | -6.287 | 5.6E-23 | SLC2A9;DRD5 |
| 4 | rs950310   | A | 9451948 | -9.193 | 6.5E-32 | SLC2A9;DRD5 |
| 4 | rs10939558 | T | 9453260 | -6.322 | 3.9E-22 | SLC2A9;DRD5 |
| 4 | rs7683831  | T | 9454177 | 6.043  | 3.6E-20 | SLC2A9;DRD5 |
| 4 | rs13141635 | T | 9455083 | -6.091 | 1.3E-21 | SLC2A9;DRD5 |
| 4 | rs1976792  | A | 9455407 | -9.270 | 3.7E-28 | SLC2A9;DRD5 |
| 4 | rs13119059 | C | 9456958 | 6.091  | 1.3E-21 | SLC2A9;DRD5 |
| 4 | rs11721988 | A | 9457997 | 8.200  | 1.1E-28 | SLC2A9;DRD5 |
| 4 | rs2176644  | T | 9458626 | -8.195 | 1.2E-28 | SLC2A9;DRD5 |
| 4 | rs6812007  | A | 9459318 | -6.055 | 3.0E-20 | SLC2A9;DRD5 |
| 4 | rs6831796  | C | 9461996 | 8.317  | 6.8E-30 | SLC2A9;DRD5 |
| 4 | rs6826806  | A | 9465567 | 7.885  | 2.6E-27 | SLC2A9;DRD5 |
| 4 | rs4697900  | A | 9469074 | 6.002  | 1.1E-18 | SLC2A9;DRD5 |
| 4 | rs9684729  | T | 9471134 | -6.117 | 1.4E-20 | SLC2A9;DRD5 |
| 4 | rs4697903  | A | 9474524 | -7.933 | 1.6E-27 | SLC2A9;DRD5 |
| 4 | rs2292917  | C | 9476375 | -6.112 | 7.9E-22 | SLC2A9;DRD5 |
| 4 | rs2139243  | A | 9476600 | 8.300  | 3.0E-29 | SLC2A9;DRD5 |
| 4 | rs883041   | T | 9477444 | -7.933 | 1.4E-27 | SLC2A9;DRD5 |
| 4 | rs13105954 | C | 9477515 | -6.113 | 7.1E-22 | SLC2A9;DRD5 |
| 4 | rs939134   | A | 9477691 | 7.928  | 1.4E-27 | SLC2A9;DRD5 |
| 4 | rs884573   | C | 9478832 | -9.243 | 1.2E-30 | SLC2A9;DRD5 |

|   |            |   |         |        |          |        |        |
|---|------------|---|---------|--------|----------|--------|--------|
| 4 | rs1048252  | T | 9479633 | 10.182 | 6.2E-25  | SLC2A9 | SLC2A9 |
| 4 | rs1568318  | T | 9480639 | 8.717  | 1.2E-30  | SLC2A9 | SLC2A9 |
| 4 | rs2867394  | A | 9481573 | -9.073 | 1.4E-32  | SLC2A9 | SLC2A9 |
| 4 | rs13148571 | A | 9482953 | 7.349  | 6.7E-26  | SLC2A9 | SLC2A9 |
| 4 | rs1519098  | A | 9490256 | 5.836  | 6.1E-21  | SLC2A9 | SLC2A9 |
| 4 | rs6824636  | C | 9490949 | -7.198 | 1.7E-26  | SLC2A9 | SLC2A9 |
| 4 | rs6449090  | T | 9493634 | 6.031  | 3.2E-20  | SLC2A9 | SLC2A9 |
| 4 | rs10939599 | A | 9495958 | -8.657 | 2.8E-30  | SLC2A9 | SLC2A9 |
| 4 | rs10939600 | A | 9496029 | 6.044  | 3.2E-20  | SLC2A9 | SLC2A9 |
| 4 | rs9993652  | C | 9497947 | -6.027 | 8.2E-15  | SLC2A9 | SLC2A9 |
| 4 | rs6818572  | A | 9498546 | -8.610 | 2.4E-28  | SLC2A9 | SLC2A9 |
| 4 | rs1107710  | A | 9499806 | 8.658  | 2.7E-30  | SLC2A9 | SLC2A9 |
| 4 | rs938563   | C | 9500096 | -8.273 | 1.8E-28  | SLC2A9 | SLC2A9 |
| 4 | rs938562   | T | 9500129 | -8.696 | 2.0E-30  | SLC2A9 | SLC2A9 |
| 4 | rs10939602 | T | 9501200 | 6.082  | 2.3E-20  | SLC2A9 | SLC2A9 |
| 4 | rs4697692  | T | 9502295 | -8.251 | 4.4E-25  | SLC2A9 | SLC2A9 |
| 4 | rs12644047 | A | 9502501 | -9.266 | 7.4E-33  | SLC2A9 | SLC2A9 |
| 4 | rs7669444  | A | 9502675 | 6.117  | 1.9E-20  | SLC2A9 | SLC2A9 |
| 4 | rs4697693  | A | 9504958 | 7.836  | 3.7E-31  | SLC2A9 | SLC2A9 |
| 4 | rs10939605 | A | 9505391 | -7.855 | 2.8E-31  | SLC2A9 | SLC2A9 |
| 4 | rs4697694  | T | 9505740 | 7.866  | 2.4E-31  | SLC2A9 | SLC2A9 |
| 4 | rs6449097  | T | 9505832 | -5.919 | 1.6E-22  | SLC2A9 | SLC2A9 |
| 4 | rs13115121 | T | 9506440 | -5.915 | 1.7E-22  | SLC2A9 | SLC2A9 |
| 4 | rs13129868 | A | 9506470 | 5.912  | 1.8E-22  | SLC2A9 | SLC2A9 |
| 4 | rs13122026 | T | 9507305 | -5.899 | 2.1E-22  | SLC2A9 | SLC2A9 |
| 4 | rs6449100  | T | 9510661 | 5.744  | 5.1E-21  | SLC2A9 | SLC2A9 |
| 4 | rs4697910  | A | 9510972 | -7.887 | 2.2E-31  | SLC2A9 | SLC2A9 |
| 4 | rs11732681 | A | 9511974 | 6.109  | 2.5E-23  | SLC2A9 | SLC2A9 |
| 4 | rs11737685 | A | 9512219 | -7.251 | 4.6E-29  | SLC2A9 | SLC2A9 |
| 4 | rs7694136  | C | 9517889 | -5.853 | 3.8E-22  | SLC2A9 | SLC2A9 |
| 4 | rs2280202  | T | 9518393 | -5.853 | 3.9E-22  | SLC2A9 | SLC2A9 |
| 4 | rs2280205  | A | 9519021 | 5.872  | 2.7E-22  | SLC2A9 | SLC2A9 |
| 4 | rs11734893 | A | 9519539 | 5.877  | 2.6E-22  | SLC2A9 | SLC2A9 |
| 4 | rs13103429 | T | 9519733 | 5.882  | 2.5E-22  | SLC2A9 | SLC2A9 |
| 4 | rs13108825 | C | 9519761 | -5.889 | 2.4E-22  | SLC2A9 | SLC2A9 |
| 4 | rs11722228 | T | 9524839 | 12.521 | 3.7E-90  | SLC2A9 | SLC2A9 |
| 4 | rs4697695  | A | 9524948 | 12.501 | 4.6E-90  | SLC2A9 | SLC2A9 |
| 4 | rs10516194 | T | 9525307 | 31.714 | 9.6E-31  | SLC2A9 | SLC2A9 |
| 4 | rs10805346 | T | 9529445 | 16.583 | 7.2E-167 | SLC2A9 | SLC2A9 |
| 4 | rs874432   | A | 9529704 | 23.578 | 1.8E-235 | SLC2A9 | SLC2A9 |
| 4 | rs6823877  | T | 9531029 | 12.578 | 9.4E-91  | SLC2A9 | SLC2A9 |
| 4 | rs16890979 | T | 9531265 | 23.635 | 3.2E-241 | SLC2A9 | SLC2A9 |
| 4 | rs938564   | T | 9531671 | 23.787 | 1.7E-238 | SLC2A9 | SLC2A9 |
| 4 | rs734553   | T | 9532102 | 23.679 | 5.6E-239 | SLC2A9 | SLC2A9 |
| 4 | rs6832439  | A | 9533417 | 23.758 | 5.5E-238 | SLC2A9 | SLC2A9 |
| 4 | rs938553   | T | 9534624 | 9.436  | 1.0E-17  | SLC2A9 | SLC2A9 |
| 4 | rs938554   | C | 9534790 | 23.766 | 4.3E-238 | SLC2A9 | SLC2A9 |
| 4 | rs938555   | A | 9535149 | 23.767 | 4.3E-238 | SLC2A9 | SLC2A9 |
| 4 | rs10939614 | T | 9535711 | 12.705 | 2.4E-91  | SLC2A9 | SLC2A9 |
| 4 | rs13129697 | T | 9536065 | 22.211 | 1.5E-242 | SLC2A9 | SLC2A9 |
| 4 | rs6838021  | T | 9536718 | 23.769 | 3.8E-238 | SLC2A9 | SLC2A9 |
| 4 | rs881971   | T | 9540060 | 11.893 | 6.7E-86  | SLC2A9 | SLC2A9 |

|   |            |   |         |   |        |          |        |        |
|---|------------|---|---------|---|--------|----------|--------|--------|
| 4 | rs737267   | T | 9543842 | - | 22.533 | 1.0E-234 | SLC2A9 | SLC2A9 |
| 4 | rs6855911  | A | 9545008 | - | 22.569 | 3.4E-235 | SLC2A9 | SLC2A9 |
| 4 | rs7670751  | A | 9547871 | - | 22.423 | 7.2E-166 | SLC2A9 | SLC2A9 |
| 4 | rs4447863  | T | 9548067 | - | 12.877 | 5.7E-102 | SLC2A9 | SLC2A9 |
| 4 | rs938558   | A | 9548303 | - | 22.040 | 1.2E-241 | SLC2A9 | SLC2A9 |
| 4 | rs4511996  | A | 9548916 | - | 7.046  | 3.9E-21  | SLC2A9 | SLC2A9 |
| 4 | rs5028843  | A | 9549904 | - | 22.683 | 3.4E-236 | SLC2A9 | SLC2A9 |
| 4 | rs4697913  | T | 9550360 | - | 23.207 | 7.6E-236 | SLC2A9 | SLC2A9 |
| 4 | rs7675964  | T | 9550532 | - | 22.294 | 2.1E-242 | SLC2A9 | SLC2A9 |
| 4 | rs4697698  | T | 9551675 | - | 12.687 | 3.3E-98  | SLC2A9 | SLC2A9 |
| 4 | rs4292327  | A | 9552798 | - | 7.012  | 1.1E-20  | SLC2A9 | SLC2A9 |
| 4 | rs12498742 | A | 9553150 | - | 23.067 | 6.9E-234 | SLC2A9 | SLC2A9 |
| 4 | rs6449144  | T | 9553748 | - | 12.977 | 5.4E-92  | SLC2A9 | SLC2A9 |
| 4 | rs4235346  | T | 9554394 | - | 12.684 | 5.7E-98  | SLC2A9 | SLC2A9 |
| 4 | rs4697700  | C | 9554890 | - | 22.273 | 4.2E-217 | SLC2A9 | SLC2A9 |
| 4 | rs4697701  | A | 9555193 | - | 22.462 | 9.3E-240 | SLC2A9 | SLC2A9 |
| 4 | rs16891234 | T | 9555261 | - | -6.541 | 1.3E-18  | SLC2A9 | SLC2A9 |
| 4 | rs4475146  | A | 9555754 | - | 23.438 | 3.2E-233 | SLC2A9 | SLC2A9 |
| 4 | rs2018643  | T | 9556219 | - | 11.654 | 8.4E-82  | SLC2A9 | SLC2A9 |
| 4 | rs1122141  | T | 9556376 | - | 12.553 | 1.5E-91  | SLC2A9 | SLC2A9 |
| 4 | rs4621431  | A | 9556688 | - | 11.661 | 4.9E-82  | SLC2A9 | SLC2A9 |
| 4 | rs4339211  | T | 9556756 | - | 11.658 | 3.7E-82  | SLC2A9 | SLC2A9 |
| 4 | rs7694997  | A | 9556909 | - | 11.658 | 2.5E-82  | SLC2A9 | SLC2A9 |
| 4 | rs7686538  | T | 9557175 | - | 11.654 | 2.5E-82  | SLC2A9 | SLC2A9 |
| 4 | rs4580649  | A | 9557559 | - | 11.652 | 2.5E-82  | SLC2A9 | SLC2A9 |
| 4 | rs998676   | T | 9557662 | - | 12.704 | 4.0E-98  | SLC2A9 | SLC2A9 |
| 4 | rs998675   | T | 9557927 | - | 12.702 | 4.0E-98  | SLC2A9 | SLC2A9 |
| 4 | rs12498150 | T | 9559635 | - | 11.640 | 2.8E-82  | SLC2A9 | SLC2A9 |
| 4 | rs12498956 | A | 9559803 | - | 11.645 | 2.3E-82  | SLC2A9 | SLC2A9 |
| 4 | rs13328050 | T | 9560218 | - | 11.649 | 2.2E-82  | SLC2A9 | SLC2A9 |
| 4 | rs1079128  | T | 9560319 | - | 11.653 | 2.2E-82  | SLC2A9 | SLC2A9 |
| 4 | rs9993410  | T | 9560362 | - | 11.654 | 2.3E-82  | SLC2A9 | SLC2A9 |
| 4 | rs11723439 | T | 9560917 | - | 25.262 | 4.4E-238 | SLC2A9 | SLC2A9 |
| 4 | rs4235347  | T | 9561054 | - | 11.550 | 2.3E-79  | SLC2A9 | SLC2A9 |
| 4 | rs4455410  | T | 9562395 | - | 11.569 | 1.6E-79  | SLC2A9 | SLC2A9 |
| 4 | rs4560411  | A | 9562459 | - | 11.578 | 1.5E-79  | SLC2A9 | SLC2A9 |
| 4 | rs4447861  | T | 9563038 | - | 11.007 | 5.5E-70  | SLC2A9 | SLC2A9 |
| 4 | rs4459990  | T | 9563103 | - | 11.609 | 9.7E-80  | SLC2A9 | SLC2A9 |
| 4 | rs9994266  | A | 9563548 | - | 11.613 | 9.3E-80  | SLC2A9 | SLC2A9 |
| 4 | rs7376948  | A | 9563806 | - | 11.618 | 9.3E-80  | SLC2A9 | SLC2A9 |
| 4 | rs7375587  | A | 9563856 | - | 11.620 | 9.2E-80  | SLC2A9 | SLC2A9 |
| 4 | rs7378305  | T | 9563991 | - | 11.643 | 6.9E-80  | SLC2A9 | SLC2A9 |
| 4 | rs7375599  | A | 9564016 | - | 12.877 | 2.3E-98  | SLC2A9 | SLC2A9 |
| 4 | rs7378340  | T | 9564296 | - | 11.689 | 9.0E-80  | SLC2A9 | SLC2A9 |
| 4 | rs4519796  | A | 9565034 | - | 11.689 | 9.3E-80  | SLC2A9 | SLC2A9 |

|   |            |   |         |   |        |          |        |        |
|---|------------|---|---------|---|--------|----------|--------|--------|
| 4 | rs4311316  | A | 9565069 | - | 11.690 | 9.5E-80  | SLC2A9 | SLC2A9 |
| 4 | rs4481233  | T | 9565177 | - | 25.390 | 2.3E-230 | SLC2A9 | SLC2A9 |
| 4 | rs4314284  | T | 9565194 | - | 11.695 | 9.0E-80  | SLC2A9 | SLC2A9 |
| 4 | rs4312757  | A | 9565243 | - | 12.167 | 1.2E-83  | SLC2A9 | SLC2A9 |
| 4 | rs6814664  | T | 9565326 | - | 11.720 | 7.0E-80  | SLC2A9 | SLC2A9 |
| 4 | rs6449155  | T | 9565645 | - | 11.722 | 6.9E-80  | SLC2A9 | SLC2A9 |
| 4 | rs6449156  | C | 9565810 | - | 11.939 | 1.3E-82  | SLC2A9 | SLC2A9 |
| 4 | rs17245436 | A | 9567267 | - | 11.843 | 7.9E-81  | SLC2A9 | SLC2A9 |
| 4 | rs17185835 | T | 9567278 | - | 11.842 | 9.6E-81  | SLC2A9 | SLC2A9 |
| 4 | rs17185870 | A | 9567312 | - | 11.856 | 2.3E-80  | SLC2A9 | SLC2A9 |
| 4 | rs11724510 | T | 9567681 | - | 11.874 | 1.3E-80  | SLC2A9 | SLC2A9 |
| 4 | rs6815001  | C | 9567760 | - | 11.881 | 1.1E-80  | SLC2A9 | SLC2A9 |
| 4 | rs6849717  | T | 9567817 | - | 13.010 | 3.9E-98  | SLC2A9 | SLC2A9 |
| 4 | rs6849729  | T | 9567830 | - | 11.894 | 6.4E-81  | SLC2A9 | SLC2A9 |
| 4 | rs6843873  | A | 9567886 | - | 11.894 | 6.4E-81  | SLC2A9 | SLC2A9 |
| 4 | rs6850143  | T | 9568022 | - | 11.894 | 6.3E-81  | SLC2A9 | SLC2A9 |
| 4 | rs6844316  | A | 9568075 | - | 11.895 | 6.1E-81  | SLC2A9 | SLC2A9 |
| 4 | rs6834893  | T | 9568221 | - | 11.902 | 5.1E-81  | SLC2A9 | SLC2A9 |
| 4 | rs10001964 | T | 9568373 | - | 11.730 | 1.3E-74  | SLC2A9 | SLC2A9 |
| 4 | rs4515163  | T | 9568701 | - | 11.995 | 4.3E-82  | SLC2A9 | SLC2A9 |
| 4 | rs6449157  | A | 9569540 | - | 11.958 | 1.7E-81  | SLC2A9 | SLC2A9 |
| 4 | rs6449159  | A | 9569596 | - | 11.945 | 1.4E-81  | SLC2A9 | SLC2A9 |
| 4 | rs7672947  | C | 9570466 | - | 11.937 | 1.7E-81  | SLC2A9 | SLC2A9 |
| 4 | rs17245723 | A | 9571316 | - | 12.157 | 2.8E-84  | SLC2A9 | SLC2A9 |
| 4 | rs11942223 | T | 9571863 | - | 23.848 | 5.8E-229 | SLC2A9 | SLC2A9 |
| 4 | rs6823361  | A | 9572225 | - | 11.816 | 3.4E-80  | SLC2A9 | SLC2A9 |
| 4 | rs6836706  | A | 9573349 | - | 11.815 | 3.3E-80  | SLC2A9 | SLC2A9 |
| 4 | rs6850684  | T | 9573478 | - | 11.814 | 3.4E-80  | SLC2A9 | SLC2A9 |
| 4 | rs10018204 | T | 9573668 | - | 11.810 | 3.3E-80  | SLC2A9 | SLC2A9 |
| 4 | rs6839490  | C | 9574098 | - | 11.745 | 1.6E-79  | SLC2A9 | SLC2A9 |
| 4 | rs6856127  | T | 9574541 | - | 11.809 | 2.7E-80  | SLC2A9 | SLC2A9 |
| 4 | rs6840802  | C | 9574731 | - | 11.757 | 1.2E-79  | SLC2A9 | SLC2A9 |
| 4 | rs6449171  | T | 9575096 | - | 11.820 | 1.9E-80  | SLC2A9 | SLC2A9 |
| 4 | rs6449172  | A | 9575134 | - | 11.821 | 1.5E-80  | SLC2A9 | SLC2A9 |
| 4 | rs6449173  | T | 9575203 | - | 23.807 | 6.5E-229 | SLC2A9 | SLC2A9 |
| 4 | rs6847019  | T | 9575347 | - | 6.848  | 4.2E-19  | SLC2A9 | SLC2A9 |
| 4 | rs7442295  | A | 9575478 | - | 23.801 | 9.9E-229 | SLC2A9 | SLC2A9 |
| 4 | rs6449174  | T | 9575520 | - | 11.821 | 1.1E-80  | SLC2A9 | SLC2A9 |
| 4 | rs9998811  | A | 9575575 | - | 23.792 | 7.1E-229 | SLC2A9 | SLC2A9 |
| 4 | rs7658170  | T | 9575691 | - | 11.822 | 7.1E-81  | SLC2A9 | SLC2A9 |
| 4 | rs6449175  | T | 9575708 | - | -6.923 | 1.6E-19  | SLC2A9 | SLC2A9 |
| 4 | rs7663097  | T | 9575889 | - | 12.498 | 1.8E-91  | SLC2A9 | SLC2A9 |
| 4 | rs7676733  | A | 9576054 | - | 11.810 | 7.2E-81  | SLC2A9 | SLC2A9 |
| 4 | rs10017674 | T | 9576151 | - | 11.665 | 8.0E-78  | SLC2A9 | SLC2A9 |
| 4 | rs7435196  | A | 9576654 | - | 11.795 | 3.9E-81  | SLC2A9 | SLC2A9 |
| 4 | rs6449176  | A | 9576941 | - | 11.792 | 4.1E-81  | SLC2A9 | SLC2A9 |

|   |            |   |         |   |        |          |        |        |
|---|------------|---|---------|---|--------|----------|--------|--------|
| 4 | rs6449178  | T | 9577782 | - | 11.787 | 4.2E-81  | SLC2A9 | SLC2A9 |
| 4 | rs6449179  | A | 9578215 | - | 11.781 | 4.5E-81  | SLC2A9 | SLC2A9 |
| 4 | rs7677710  | T | 9578615 | - | 11.784 | 3.4E-81  | SLC2A9 | SLC2A9 |
| 4 | rs7683283  | T | 9579072 | - | 11.779 | 3.0E-81  | SLC2A9 | SLC2A9 |
| 4 | rs7376960  | A | 9579668 | - | 23.545 | 1.3E-228 | SLC2A9 | SLC2A9 |
| 4 | rs6449183  | A | 9579789 | - | 12.506 | 2.6E-93  | SLC2A9 | SLC2A9 |
| 4 | rs4292328  | T | 9580060 | - | 12.992 | 2.1E-100 | SLC2A9 | SLC2A9 |
| 4 | rs4473653  | A | 9580156 | - | 11.693 | 9.5E-81  | SLC2A9 | SLC2A9 |
| 4 | rs7439210  | C | 9580847 | - | 23.219 | 4.4E-217 | SLC2A9 | SLC2A9 |
| 4 | rs13132625 | A | 9581261 | - | 10.616 | 3.1E-11  | SLC2A9 | SLC2A9 |
| 4 | rs13103690 | T | 9581876 | - | 12.491 | 3.3E-93  | SLC2A9 | SLC2A9 |
| 4 | rs13103879 | T | 9581977 | - | 12.486 | 3.6E-93  | SLC2A9 | SLC2A9 |
| 4 | rs6852441  | T | 9582842 | - | 11.756 | 1.7E-81  | SLC2A9 | SLC2A9 |
| 4 | rs6449201  | T | 9582992 | - | 11.756 | 1.7E-81  | SLC2A9 | SLC2A9 |
| 4 | rs6449202  | T | 9583141 | - | 11.754 | 1.7E-81  | SLC2A9 | SLC2A9 |
| 4 | rs1071988  | A | 9583736 | - | 23.105 | 1.3E-217 | SLC2A9 | SLC2A9 |
| 4 | rs4505821  | A | 9587192 | - | 6.925  | 1.8E-20  | SLC2A9 | SLC2A9 |
| 4 | rs16868246 | C | 9587403 | - | 23.039 | 2.6E-217 | SLC2A9 | SLC2A9 |
| 4 | rs13103497 | A | 9588360 | - | 12.149 | 5.4E-79  | SLC2A9 | SLC2A9 |
| 4 | rs13144899 | T | 9588400 | - | 10.632 | 1.4E-11  | SLC2A9 | SLC2A9 |
| 4 | rs13125476 | A | 9588712 | - | 10.630 | 1.4E-11  | SLC2A9 | SLC2A9 |
| 4 | rs11723970 | T | 9589560 | - | 13.668 | 4.4E-106 | SLC2A9 | SLC2A9 |
| 4 | rs11722229 | A | 9589795 | - | 22.863 | 7.4E-215 | SLC2A9 | SLC2A9 |
| 4 | rs882223   | A | 9590723 | - | 13.243 | 1.9E-99  | SLC2A9 | SLC2A9 |
| 4 | rs13131257 | T | 9590987 | - | 22.703 | 5.0E-213 | SLC2A9 | SLC2A9 |
| 4 | rs13145758 | A | 9591095 | - | 22.684 | 1.4E-211 | SLC2A9 | SLC2A9 |
| 4 | rs13125029 | A | 9591127 | - | 11.694 | 6.3E-77  | SLC2A9 | SLC2A9 |
| 4 | rs13125209 | A | 9591142 | - | 22.527 | 1.3E-199 | SLC2A9 | SLC2A9 |
| 4 | rs13115193 | T | 9591289 | - | 12.830 | 8.2E-99  | SLC2A9 | SLC2A9 |
| 4 | rs13125646 | A | 9591428 | - | 23.307 | 1.2E-192 | SLC2A9 | SLC2A9 |
| 4 | rs10003001 | T | 9593573 | - | 7.011  | 2.0E-20  | SLC2A9 | SLC2A9 |
| 4 | rs10033612 | T | 9594104 | - | 7.065  | 1.2E-20  | SLC2A9 | SLC2A9 |
| 4 | rs11723591 | A | 9594496 | - | 12.983 | 1.0E-100 | SLC2A9 | SLC2A9 |
| 4 | rs7660895  | A | 9594543 | - | 22.330 | 2.8E-230 | SLC2A9 | SLC2A9 |
| 4 | rs7680126  | A | 9594694 | - | 23.141 | 6.7E-225 | SLC2A9 | SLC2A9 |
| 4 | rs17246501 | A | 9594808 | - | 12.981 | 7.0E-101 | SLC2A9 | SLC2A9 |
| 4 | rs9992406  | T | 9595386 | - | 7.089  | 1.5E-20  | SLC2A9 | SLC2A9 |
| 4 | rs6849736  | A | 9595881 | - | -8.090 | 4.7E-09  | SLC2A9 | SLC2A9 |
| 4 | rs6836200  | T | 9596013 | - | 8.072  | 5.3E-09  | SLC2A9 | SLC2A9 |
| 4 | rs3733590  | T | 9596324 | - | 8.078  | 5.3E-09  | SLC2A9 | SLC2A9 |
| 4 | rs4385059  | T | 9598331 | - | 24.445 | 1.6E-228 | SLC2A9 | SLC2A9 |
| 4 | rs4502681  | T | 9599270 | - | 10.955 | 7.2E-13  | SLC2A9 | SLC2A9 |
| 4 | rs17187075 | C | 9599426 | - | 12.511 | 2.9E-93  | SLC2A9 | SLC2A9 |
| 4 | rs10011206 | T | 9601053 | - | 7.046  | 2.8E-20  | SLC2A9 | SLC2A9 |
| 4 | rs7678012  | T | 9602870 | - | 12.524 | 1.7E-93  | SLC2A9 | SLC2A9 |
| 4 | rs7663032  | T | 9602936 | - | 22.179 | 6.3E-160 | SLC2A9 | SLC2A9 |

|   |            |   |         |        |          |        |             |
|---|------------|---|---------|--------|----------|--------|-------------|
| 4 | rs6449213  | T | 9603313 | 24.376 | 3.8E-228 | SLC2A9 | SLC2A9      |
| 4 | rs3775948  | C | 9604280 | 22.620 | 2.8E-233 | SLC2A9 | SLC2A9      |
| 4 | rs12499857 | A | 9604474 | 12.303 | 1.3E-89  | SLC2A9 | SLC2A9      |
| 4 | rs3796842  | A | 9604949 | 12.544 | 1.3E-93  | SLC2A9 | SLC2A9      |
| 4 | rs9998739  | A | 9605607 | 7.053  | 3.0E-20  | SLC2A9 | SLC2A9      |
| 4 | rs13111638 | T | 9605988 | 24.656 | 2.8E-232 | SLC2A9 | SLC2A9      |
| 4 | rs4547795  | T | 9606158 | 7.087  | 2.0E-20  | SLC2A9 | SLC2A9      |
| 4 | rs4529048  | A | 9606210 | 22.720 | 5.2E-236 | SLC2A9 | SLC2A9      |
| 4 | rs3733588  | A | 9606401 | 22.790 | 6.6E-237 | SLC2A9 | SLC2A9      |
| 4 | rs3733587  | A | 9606532 | -7.103 | 1.6E-20  | SLC2A9 | SLC2A9      |
| 4 | rs7669607  | T | 9606899 | 23.967 | 1.1E-235 | SLC2A9 | SLC2A9      |
| 4 | rs10939650 | T | 9607538 | 22.772 | 3.3E-237 | SLC2A9 | SLC2A9      |
| 4 | rs13113918 | A | 9607591 | 23.571 | 1.6E-162 | SLC2A9 | SLC2A9      |
| 4 | rs10008035 | T | 9608433 | 7.101  | 1.7E-20  | SLC2A9 | SLC2A9      |
| 4 | rs7696536  | T | 9609334 | 7.099  | 1.7E-20  | SLC2A9 | SLC2A9      |
| 4 | rs1014290  | A | 9610959 | 22.711 | 8.9E-237 | SLC2A9 | SLC2A9      |
| 4 | rs7696895  | T | 9611523 | -7.095 | 1.8E-20  | SLC2A9 | SLC2A9      |
| 4 | rs9991278  | T | 9611763 | 24.056 | 4.9E-236 | SLC2A9 | SLC2A9      |
| 4 | rs4622999  | C | 9612493 | 12.593 | 2.5E-94  | SLC2A9 | SLC2A9      |
| 4 | rs7657096  | A | 9613098 | 8.523  | 1.6E-09  | SLC2A9 | SLC2A9      |
| 4 | rs17247314 | C | 9613841 | 12.411 | 9.7E-93  | SLC2A9 | SLC2A9      |
| 4 | rs10023068 | A | 9613930 | 20.054 | 8.3E-147 | SLC2A9 | SLC2A9      |
| 4 | rs6853437  | A | 9614533 | 20.050 | 9.4E-147 | SLC2A9 | SLC2A9      |
| 4 | rs10022499 | A | 9615635 | 20.017 | 4.7E-147 | SLC2A9 | SLC2A9      |
| 4 | rs9291640  | T | 9616184 | 20.012 | 4.6E-147 | SLC2A9 | SLC2A9      |
| 4 | rs9291642  | T | 9616373 | 22.239 | 1.7E-144 | SLC2A9 | SLC2A9      |
| 4 | rs4543113  | A | 9617403 | 11.121 | 3.7E-73  | SLC2A9 | SLC2A9      |
| 4 | rs6845554  | T | 9622271 | 11.273 | 2.4E-76  | SLC2A9 | SLC2A9      |
| 4 | rs3756236  | A | 9622561 | 12.046 | 1.6E-88  | SLC2A9 | SLC2A9      |
| 4 | rs6827754  | A | 9627251 | 11.231 | 6.8E-76  | SLC2A9 | WDR1;SLC2A9 |
| 4 | rs13133766 | T | 9628830 | 12.040 | 1.8E-88  | SLC2A9 | WDR1;SLC2A9 |
| 4 | rs2240720  | T | 9629578 | 12.032 | 2.6E-88  | SLC2A9 | WDR1;SLC2A9 |
| 4 | rs2240721  | A | 9629662 | 12.025 | 4.1E-88  | SLC2A9 | WDR1;SLC2A9 |
| 4 | rs2240724  | C | 9630388 | 11.943 | 1.9E-86  | SLC2A9 | WDR1;SLC2A9 |
| 4 | rs6849273  | T | 9630693 | 11.222 | 5.5E-75  | SLC2A9 | WDR1;SLC2A9 |
| 4 | rs12509955 | T | 9633401 | 22.532 | 1.3E-201 | SLC2A9 | WDR1;SLC2A9 |
| 4 | rs3775940  | A | 9634261 | 11.211 | 2.7E-75  | SLC2A9 | WDR1;SLC2A9 |
| 4 | rs6826764  | C | 9639892 | 19.686 | 1.1E-137 | SLC2A9 | WDR1;SLC2A9 |
| 4 | rs6856396  | A | 9640261 | 21.660 | 7.4E-139 | SLC2A9 | WDR1;SLC2A9 |
| 4 | rs12506455 | A | 9640667 | 11.999 | 1.2E-87  | SLC2A9 | WDR1;SLC2A9 |
| 4 | rs10939663 | T | 9641614 | 11.171 | 7.3E-61  | SLC2A9 | WDR1;SLC2A9 |
| 4 | rs12506122 | A | 9642636 | 11.288 | 2.5E-76  | SLC2A9 | WDR1;SLC2A9 |
| 4 | rs13146686 | T | 9644031 | 11.002 | 2.7E-72  | SLC2A9 | WDR1;SLC2A9 |
| 4 | rs11722930 | A | 9644552 | 12.013 | 6.4E-88  | SLC2A9 | WDR1;SLC2A9 |
| 4 | rs10006397 | A | 9645238 | 19.596 | 5.9E-137 | SLC2A9 | WDR1;SLC2A9 |
| 4 | rs11727199 | T | 9645288 | 12.019 | 5.7E-88  | SLC2A9 | WDR1;SLC2A9 |
| 4 | rs3733585  | A | 9645437 | 12.024 | 4.9E-88  | SLC2A9 | WDR1;SLC2A9 |
| 4 | rs11731110 | T | 9646444 | 12.010 | 6.0E-88  | SLC2A9 | WDR1;SLC2A9 |
| 4 | rs10939665 | T | 9646726 | -      | 4.5E-88  | SLC2A9 | WDR1;SLC2A9 |

|   |            |   |         |        |          |         |                    |
|---|------------|---|---------|--------|----------|---------|--------------------|
|   |            |   |         | 12.017 |          |         |                    |
| 4 | rs10012779 | T | 9647210 | -      | 16.876   | 1.2E-42 | SLC2A9 WDR1;SLC2A9 |
| 4 | rs13139055 | T | 9648022 | 11.332 | 1.1E-76  | SLC2A9  | WDR1;SLC2A9        |
| 4 | rs13115776 | C | 9649287 | 11.338 | 1.0E-76  | SLC2A9  | WDR1;SLC2A9        |
| 4 | rs12508991 | T | 9650202 | 12.045 | 3.9E-88  | SLC2A9  | WDR1;SLC2A9        |
| 4 | rs10029311 | T | 9650232 | 16.920 | 1.6E-42  | SLC2A9  | WDR1;SLC2A9        |
| 4 | rs7679916  | T | 9651258 | 12.053 | 3.4E-88  |         | WDR1;SLC2A9        |
| 4 | rs7349721  | A | 9651660 | 19.342 | 3.9E-135 |         | WDR1;SLC2A9        |
| 4 | rs13101785 | A | 9652013 | 11.999 | 1.2E-87  |         | WDR1;SLC2A9        |
| 4 | rs13137343 | A | 9652126 | 11.999 | 1.1E-87  |         | WDR1;SLC2A9        |
| 4 | rs13110307 | T | 9653462 | 11.309 | 2.4E-76  |         | WDR1;SLC2A9        |
| 4 | rs13129453 | T | 9653882 | 11.308 | 2.5E-76  |         | WDR1;SLC2A9        |
| 4 | rs4529049  | T | 9654487 | 11.307 | 2.4E-76  |         | WDR1;SLC2A9        |
| 4 | rs10939669 | A | 9654925 | 12.018 | 6.2E-88  |         | WDR1;SLC2A9        |
| 4 | rs733175   | T | 9659239 | 19.172 | 4.4E-134 |         | WDR1;SLC2A9        |
| 4 | rs13120348 | C | 9662253 | 11.299 | 8.1E-76  |         | WDR1;SLC2A9        |
| 4 | rs7671266  | T | 9665474 | 22.072 | 3.0E-193 |         | WDR1;SLC2A9        |
| 4 | rs10516198 | T | 9668546 | -5.414 | 1.0E-12  |         | WDR1;SLC2A9        |
| 4 | rs714873   | A | 9668716 | 14.313 | 1.1E-83  |         | WDR1;SLC2A9        |
| 4 | rs6834555  | A | 9671424 | 14.328 | 8.6E-84  |         | WDR1;SLC2A9        |
| 4 | rs12506004 | A | 9675968 | -8.991 | 8.2E-42  |         | WDR1;SLC2A9        |
| 4 | rs16868313 | T | 9677162 | 8.940  | 2.4E-41  |         | WDR1;SLC2A9        |
| 4 | rs3775938  | C | 9678629 | -4.256 | 3.0E-10  |         | WDR1;SLC2A9        |
| 4 | rs7667452  | T | 9682010 | 4.214  | 1.6E-07  |         | WDR1;SLC2A9        |
| 4 | rs4320137  | T | 9682067 | 21.166 | 9.2E-131 |         | WDR1;SLC2A9        |
| 4 | rs4461524  | A | 9683268 | -6.181 | 1.6E-16  |         | WDR1;SLC2A9        |
| 4 | rs11731597 | T | 9684583 | 8.749  | 1.9E-40  |         | WDR1;SLC2A9        |
| 4 | rs9926     | A | 9685958 | 8.766  | 6.8E-25  | WDR1    | WDR1;SLC2A9        |
| 4 | rs3775935  | A | 9686736 | 4.206  | 3.5E-10  | WDR1    | WDR1;SLC2A9        |
| 4 | rs2241469  | A | 9689560 | -4.200 | 3.6E-10  | WDR1    | WDR1;SLC2A9        |
| 4 | rs10516200 | A | 9691254 | 8.767  | 1.0E-40  | WDR1    | WDR1;SLC2A9        |
| 4 | rs3756230  | C | 9692927 | -9.407 | 2.4E-39  | WDR1    | WDR1;SLC2A9        |
| 4 | rs2241470  | T | 9693668 | -8.144 | 5.6E-26  | WDR1    | WDR1;SLC2A9        |
| 4 | rs2241473  | A | 9695047 | 8.987  | 8.6E-37  | WDR1    | WDR1;SLC2A9        |
| 4 | rs3756227  | A | 9697093 | 8.982  | 9.4E-37  | WDR1    | WDR1;SLC2A9        |
| 4 | rs2241480  | T | 9698861 | 8.682  | 5.8E-40  | WDR1    | WDR1;SLC2A9        |
| 4 | rs734122   | A | 9698963 | 8.731  | 2.2E-40  | WDR1    | WDR1;SLC2A9        |
| 4 | rs3796822  | C | 9702749 | -4.217 | 3.0E-10  | WDR1    | WDR1;SLC2A9        |
| 4 | rs3822242  | T | 9704002 | 9.912  | 7.5E-61  | WDR1    | WDR1;SLC2A9        |
| 4 | rs3822239  | A | 9704637 | -4.217 | 3.0E-10  | WDR1    | WDR1;SLC2A9        |
| 4 | rs11727087 | T | 9705118 | 11.039 | 2.4E-73  | WDR1    | WDR1;SLC2A9        |
| 4 | rs3796818  | T | 9707074 | 9.446  | 1.8E-39  | WDR1    | WDR1;SLC2A9        |
| 4 | rs11726271 | A | 9707290 | -9.889 | 1.3E-60  | WDR1    | WDR1;SLC2A9        |
| 4 | rs2241482  | A | 9708912 | 4.163  | 4.7E-10  | WDR1    | WDR1;SLC2A9        |
| 4 | rs2241483  | A | 9708929 | 9.888  | 1.3E-60  | WDR1    | WDR1;SLC2A9        |
| 4 | rs2241486  | C | 9710181 | -8.792 | 7.5E-41  | WDR1    | WDR1;SLC2A9        |
| 4 | rs2241488  | T | 9710229 | -9.455 | 1.5E-39  | WDR1    | WDR1;SLC2A9        |
| 4 | rs6830786  | T | 9710541 | 9.085  | 2.2E-42  | WDR1    | WDR1;SLC2A9        |
| 4 | rs4697917  | T | 9711058 | 4.154  | 5.3E-10  | WDR1    | WDR1               |
| 4 | rs16868326 | A | 9711691 | 8.821  | 5.6E-41  | WDR1    | WDR1               |
| 4 | rs12499240 | T | 9712988 | 4.150  | 5.5E-10  | WDR1    | WDR1               |



|   |            |   |         |        |          |      |      |
|---|------------|---|---------|--------|----------|------|------|
| 4 | rs717615   | A | 9713768 | 9.453  | 6.3E-56  | WDR1 | WDR1 |
| 4 | rs717614   | C | 9713886 | 10.879 | 3.2E-70  | WDR1 | WDR1 |
| 4 | rs3756223  | T | 9714895 | 7.006  | 1.2E-29  | WDR1 | WDR1 |
| 4 | rs12509714 | C | 9716189 | 14.062 | 1.6E-110 | WDR1 | WDR1 |
| 4 | rs4697922  | T | 9719703 | 4.102  | 8.8E-10  | WDR1 | WDR1 |
| 4 | rs4459989  | T | 9721700 | 4.905  | 1.8E-10  | WDR1 | WDR1 |
| 4 | rs2241468  | A | 9723003 | 9.383  | 1.0E-36  | WDR1 | WDR1 |
| 4 | rs4604059  | T | 9724163 | 10.122 | 4.1E-60  | WDR1 | WDR1 |
| 4 | rs4393994  | T | 9724219 | -4.204 | 3.3E-10  | WDR1 | WDR1 |
| 4 | rs12498927 | A | 9724621 | 10.212 | 1.6E-61  | WDR1 | WDR1 |
| 4 | rs10939710 | T | 9725899 | -4.867 | 3.1E-12  | WDR1 | WDR1 |
| 4 | rs3822236  | T | 9729059 | 12.004 | 4.5E-81  |      | WDR1 |
| 4 | rs12374320 | T | 9729707 | 5.453  | 5.9E-18  |      | WDR1 |
| 4 | rs4697708  | T | 9730287 | 11.747 | 2.2E-78  |      | WDR1 |
| 4 | rs3756215  | A | 9730358 | -7.012 | 1.7E-17  |      | WDR1 |
| 4 | rs4697710  | T | 9731747 | 11.743 | 2.4E-78  |      | WDR1 |
| 4 | rs6825888  | T | 9731832 | -7.861 | 3.6E-29  |      | WDR1 |
| 4 | rs4235354  | A | 9732040 | 18.443 | 5.8E-08  |      | WDR1 |
| 4 | rs4235355  | A | 9732176 | 11.742 | 2.0E-78  |      | WDR1 |
| 4 | rs4235356  | C | 9732204 | 11.741 | 2.0E-78  |      | WDR1 |
| 4 | rs4311315  | T | 9732289 | 5.193  | 4.7E-15  |      | WDR1 |
| 4 | rs12506893 | T | 9732763 | 7.817  | 6.8E-29  |      | WDR1 |
| 4 | rs10516201 | T | 9733039 | -7.647 | 7.9E-28  |      | WDR1 |
| 4 | rs4697926  | A | 9733665 | 10.316 | 9.2E-63  |      | WDR1 |
| 4 | rs4444830  | T | 9733917 | 9.355  | 1.9E-52  |      | WDR1 |
| 4 | rs4456954  | C | 9733936 | 8.403  | 1.9E-22  |      | WDR1 |
| 4 | rs715979   | C | 9734340 | -7.881 | 1.9E-27  |      | WDR1 |
| 4 | rs3886038  | T | 9734353 | 7.566  | 3.3E-27  |      | WDR1 |
| 4 | rs7699512  | T | 9734906 | -9.128 | 1.9E-51  |      | WDR1 |
| 4 | rs7699671  | T | 9734972 | 10.336 | 9.4E-64  |      | WDR1 |
| 4 | rs11722989 | A | 9735237 | 9.163  | 1.9E-51  |      | WDR1 |
| 4 | rs11723016 | A | 9735287 | 9.165  | 2.0E-51  |      | WDR1 |
| 4 | rs6449286  | A | 9735797 | 8.241  | 2.3E-36  |      | WDR1 |
| 4 | rs4619888  | A | 9736076 | -8.202 | 1.9E-31  |      | WDR1 |
| 4 | rs4467562  | A | 9736239 | 8.050  | 2.5E-36  |      | WDR1 |
| 4 | rs10001106 | T | 9736539 | -8.068 | 1.5E-36  |      | WDR1 |
| 4 | rs17250843 | C | 9737076 | -4.617 | 1.5E-09  |      | WDR1 |
| 4 | rs715260   | C | 9737244 | -8.303 | 2.0E-31  |      | WDR1 |
| 4 | rs7667775  | T | 9737634 | 7.951  | 1.2E-27  |      | WDR1 |
| 4 | rs12502556 | C | 9739603 | -8.756 | 2.2E-34  |      | WDR1 |
| 4 | rs10009493 | C | 9741145 | 20.579 | 5.3E-149 |      | WDR1 |
| 4 | rs12501597 | T | 9741235 | 8.031  | 1.7E-30  |      | WDR1 |
| 4 | rs6449289  | T | 9741641 | 9.665  | 5.9E-35  |      | WDR1 |
| 4 | rs881641   | A | 9742845 | 8.471  | 8.3E-33  |      | WDR1 |
| 4 | rs881642   | T | 9742971 | 8.010  | 2.4E-30  |      | WDR1 |
| 4 | rs881643   | A | 9743215 | 8.174  | 1.0E-32  |      | WDR1 |
| 4 | rs17197769 | T | 9743434 | 8.432  | 1.6E-32  |      | WDR1 |
| 4 | rs1109472  | C | 9743546 | 8.425  | 1.7E-32  |      | WDR1 |
| 4 | rs11938608 | T | 9744947 | -8.089 | 4.2E-32  |      | WDR1 |
| 4 | rs4358401  | A | 9745905 | -5.917 | 3.2E-22  |      | WDR1 |
| 4 | rs873984   | C | 9746223 | 6.390  | 1.0E-25  |      | WDR1 |
| 4 | rs4399989  | A | 9746486 | -5.912 | 3.1E-22  |      | WDR1 |

|   |            |   |         |        |          |      |
|---|------------|---|---------|--------|----------|------|
| 4 | rs4315785  | A | 9746705 | 5.902  | 3.4E-22  | WDR1 |
| 4 | rs4235357  | T | 9746854 | 5.904  | 2.6E-22  | WDR1 |
| 4 | rs12507725 | A | 9746888 | 8.272  | 2.9E-31  | WDR1 |
| 4 | rs17198113 | T | 9747568 | 7.773  | 1.2E-28  | WDR1 |
| 4 | rs11732828 | T | 9747844 | 5.827  | 6.5E-22  | WDR1 |
| 4 | rs10939722 | T | 9748145 | -5.888 | 2.5E-22  | WDR1 |
|   |            |   |         | -      |          |      |
| 4 | rs10939723 | T | 9748203 | 20.074 | 5.1E-144 | WDR1 |
| 4 | rs17198197 | A | 9748255 | 4.876  | 4.7E-11  | WDR1 |
| 4 | rs6449300  | T | 9748649 | 8.236  | 5.1E-31  | WDR1 |
| 4 | rs6850516  | C | 9749076 | -5.907 | 2.1E-22  | WDR1 |
| 4 | rs10025456 | T | 9749357 | -4.959 | 4.8E-16  | WDR1 |
| 4 | rs10022911 | A | 9749649 | 19.570 | 2.4E-138 | WDR1 |
| 4 | rs10020887 | C | 9749849 | 20.018 | 1.0E-142 | WDR1 |
| 4 | rs10012288 | A | 9750051 | -5.870 | 3.4E-22  | WDR1 |
| 4 | rs4533775  | C | 9750502 | 4.877  | 5.2E-11  | WDR1 |
|   |            |   |         | -      |          |      |
| 4 | rs17198547 | T | 9750517 | 19.986 | 2.1E-142 | WDR1 |
| 4 | rs10805356 | T | 9750700 | 5.891  | 2.6E-22  | WDR1 |
| 4 | rs4473652  | C | 9750715 | 4.931  | 3.6E-11  | WDR1 |
| 4 | rs10028503 | A | 9751025 | 5.916  | 1.9E-22  | WDR1 |
| 4 | rs10015494 | A | 9751088 | -5.916 | 1.8E-22  | WDR1 |
| 4 | rs10028937 | A | 9751464 | 5.913  | 1.9E-22  | WDR1 |
| 4 | rs10015872 | A | 9751508 | -5.913 | 1.8E-22  | WDR1 |
| 4 | rs17251963 | T | 9751659 | 21.349 | 1.7E-156 | WDR1 |
| 4 | rs10031453 | A | 9751757 | 5.911  | 1.9E-22  | WDR1 |
| 4 | rs4697713  | T | 9752680 | 5.907  | 2.0E-22  | WDR1 |
| 4 | rs4697930  | C | 9752692 | 5.902  | 2.1E-22  | WDR1 |
|   |            |   |         | -      |          |      |
| 4 | rs4697714  | A | 9752884 | 19.959 | 1.2E-141 | WDR1 |
| 4 | rs4292329  | C | 9753557 | -4.952 | 3.9E-11  | WDR1 |
| 4 | rs4697931  | T | 9754394 | -5.884 | 2.6E-22  | WDR1 |
| 4 | rs4574408  | A | 9754666 | -5.915 | 2.0E-22  | WDR1 |
|   |            |   |         | -      |          |      |
| 4 | rs4640669  | A | 9754831 | 19.679 | 7.2E-141 | WDR1 |
| 4 | rs4484300  | A | 9754892 | -5.996 | 8.2E-23  | WDR1 |
| 4 | rs4401449  | T | 9755096 | -6.065 | 6.6E-23  | WDR1 |
| 4 | rs10939730 | C | 9755147 | -6.062 | 7.1E-23  | WDR1 |
|   |            |   |         | -      |          |      |
| 4 | rs4697933  | A | 9755591 | 19.878 | 3.5E-141 | WDR1 |
| 4 | rs4697715  | A | 9755752 | 5.260  | 4.1E-17  | WDR1 |
| 4 | rs6855657  | T | 9757246 | 5.993  | 6.0E-22  | WDR1 |
| 4 | rs10939732 | A | 9757488 | -5.986 | 6.9E-22  | WDR1 |
| 4 | rs12507586 | A | 9757673 | 8.605  | 2.3E-32  | WDR1 |
| 4 | rs4168     | A | 9757707 | -5.970 | 9.1E-22  | WDR1 |
| 4 | rs11735668 | C | 9757753 | 19.657 | 1.9E-134 | WDR1 |
| 4 | rs12508413 | A | 9757769 | 8.618  | 1.8E-32  | WDR1 |
| 4 | rs6813334  | T | 9757851 | -8.622 | 1.7E-32  | WDR1 |
| 4 | rs6813385  | T | 9757926 | -5.003 | 4.3E-15  | WDR1 |
| 4 | rs6846402  | T | 9757979 | -5.815 | 5.1E-20  | WDR1 |
| 4 | rs4697934  | T | 9758162 | -5.918 | 2.6E-21  | WDR1 |
| 4 | rs4697936  | T | 9758693 | -5.279 | 1.7E-13  | WDR1 |
| 4 | rs4697937  | T | 9758767 | 6.395  | 9.8E-24  | WDR1 |
| 4 | rs6826693  | T | 9759837 | 5.632  | 5.6E-18  | WDR1 |
| 4 | rs6840883  | A | 9759962 | -5.482 | 3.8E-18  | WDR1 |
|   |            |   |         | -      |          |      |
| 4 | rs11721682 | T | 9760245 | 20.348 | 3.5E-141 | WDR1 |
| 4 | rs6827946  | T | 9760433 | 18.798 | 1.9E-126 | WDR1 |
| 4 | rs6827496  | A | 9760754 | -8.725 | 2.0E-33  | WDR1 |

|   |            |   |         |        |          |      |
|---|------------|---|---------|--------|----------|------|
| 4 | rs6847379  | T | 9760802 | -5.480 | 3.9E-18  | WDR1 |
| 4 | rs4697939  | A | 9761400 | 45.648 | 2.4E-14  | WDR1 |
| 4 | rs4697940  | C | 9761427 | -5.446 | 6.0E-18  | WDR1 |
| 4 | rs731069   | A | 9761529 | 5.430  | 7.6E-18  | WDR1 |
| 4 | rs731070   | T | 9761680 | -5.422 | 8.0E-18  | WDR1 |
| 4 | rs747357   | C | 9761976 | 5.423  | 7.9E-18  | WDR1 |
| 4 | rs747356   | T | 9762149 | -5.473 | 4.5E-18  | WDR1 |
| 4 | rs6851524  | A | 9764139 | 5.113  | 6.6E-11  | WDR1 |
| 4 | rs11932627 | T | 9765275 | -9.173 | 1.5E-07  | WDR1 |
| 4 | rs12513376 | T | 9765320 | 8.281  | 1.1E-30  | WDR1 |
| 4 | rs11929718 | A | 9765419 | -8.492 | 5.1E-37  | WDR1 |
| 4 | rs6834055  | A | 9767609 | 18.595 | 8.6E-124 | WDR1 |
| 4 | rs2241464  | A | 9768059 | 6.325  | 3.7E-17  | WDR1 |
| 4 | rs2241465  | T | 9768118 | -8.846 | 3.7E-38  | WDR1 |
| 4 | rs4697941  | A | 9769960 | -8.201 | 5.3E-34  | WDR1 |
| 4 | rs17450260 | A | 9772887 | -8.606 | 1.1E-32  | WDR1 |
| 4 | rs6816215  | T | 9773125 | -6.058 | 3.8E-19  | WDR1 |
| 4 | rs17450372 | T | 9773442 | -8.605 | 1.1E-32  | WDR1 |
| 4 | rs1009144  | T | 9774029 | 8.965  | 1.0E-34  | WDR1 |
| 4 | rs17450434 | T | 9774059 | 8.967  | 9.7E-35  | WDR1 |
| 4 | rs16894270 | T | 9774877 | -4.833 | 5.2E-13  | WDR1 |
| 4 | rs11729371 | A | 9775055 | 20.660 | 1.1E-62  | WDR1 |
| 4 | rs11724641 | A | 9776092 | -8.219 | 7.4E-32  | WDR1 |
| 4 | rs7659717  | T | 9776315 | -9.177 | 1.5E-37  | WDR1 |
| 4 | rs17385112 | T | 9776630 | 17.304 | 8.1E-74  | WDR1 |
| 4 | rs17385294 | A | 9777545 | 9.054  | 1.8E-35  | WDR1 |
| 4 | rs1001216  | A | 9777947 | 17.181 | 1.1E-73  | WDR1 |
| 4 | rs1001217  | C | 9778097 | 3.396  | 1.3E-07  | WDR1 |
| 4 | rs11734209 | A | 9779469 | 5.849  | 2.4E-15  | WDR1 |
| 4 | rs4697948  | C | 9780665 | 3.465  | 6.6E-08  | WDR1 |
| 4 | rs6835689  | T | 9781577 | -3.367 | 1.2E-07  | WDR1 |
| 4 | rs4697721  | C | 9783315 | -8.423 | 3.0E-37  | WDR1 |
| 4 | rs2903827  | C | 9784970 | 20.540 | 1.9E-153 | WDR1 |
| 4 | rs2868414  | C | 9786218 | -8.212 | 1.6E-36  | WDR1 |
| 4 | rs17385872 | A | 9787266 | 9.372  | 3.3E-41  | WDR1 |
| 4 | rs16894579 | T | 9787315 | -8.185 | 1.3E-36  | WDR1 |
| 4 | rs10033955 | A | 9787654 | -8.178 | 1.4E-36  | WDR1 |
| 4 | rs11737347 | A | 9788020 | 8.177  | 1.3E-36  | WDR1 |
| 4 | rs7657551  | T | 9788407 | 8.196  | 9.8E-37  | WDR1 |
| 4 | rs6449342  | A | 9788867 | 8.197  | 8.3E-37  | WDR1 |
| 4 | rs4273473  | T | 9789720 | 8.204  | 6.6E-37  | WDR1 |
| 4 | rs11724112 | T | 9789741 | 11.359 | 9.5E-78  | WDR1 |
| 4 | rs6811287  | T | 9789921 | 11.278 | 1.9E-77  | WDR1 |
| 4 | rs723663   | A | 9790472 | 8.196  | 7.2E-37  | WDR1 |
| 4 | rs12500891 | A | 9790485 | 9.075  | 2.0E-39  | WDR1 |
| 4 | rs4697956  | T | 9790770 | -8.183 | 9.7E-37  | WDR1 |
| 4 | rs4697957  | A | 9791352 | 20.315 | 8.7E-156 | WDR1 |
| 4 | rs4697958  | T | 9791654 | 8.176  | 1.1E-36  | WDR1 |
| 4 | rs887735   | T | 9791943 | -9.431 | 2.0E-42  | WDR1 |
| 4 | rs887733   | T | 9792206 | 8.941  | 3.5E-46  | WDR1 |
| 4 | rs887732   | C | 9792215 | 20.314 | 9.0E-156 | WDR1 |
| 4 | rs887731   | A | 9792284 | 8.164  | 1.4E-36  | WDR1 |
| 4 | rs887729   | C | 9792709 | -9.048 | 3.1E-39  | WDR1 |
| 4 | rs887728   | A | 9792896 | 8.139  | 1.9E-36  | WDR1 |

|   |            |   |         |        |          |
|---|------------|---|---------|--------|----------|
| 4 | rs887727   | A | 9792917 | -8.345 | 3.7E-37  |
| 4 | rs887725   | T | 9792993 | 4.930  | 6.5E-15  |
| 4 | rs11722345 | A | 9795897 | -8.047 | 7.0E-36  |
| 4 | rs4697960  | C | 9796361 | -8.270 | 1.0E-36  |
| 4 | rs4697727  | T | 9797020 | 8.150  | 3.1E-36  |
| 4 | rs956312   | A | 9797424 | -7.969 | 2.1E-35  |
| 4 | rs956311   | A | 9797479 | -8.022 | 9.5E-36  |
| 4 | rs11721530 | A | 9798260 | -8.035 | 7.5E-36  |
| 4 | rs4697964  | A | 9798910 | 8.038  | 7.2E-36  |
| 4 | rs4697965  | A | 9799156 | 8.038  | 7.1E-36  |
| 4 | rs4697966  | A | 9799172 | -8.046 | 6.3E-36  |
| 4 | rs2215691  | T | 9801206 | -8.105 | 2.0E-36  |
| 4 | rs10489080 | C | 9802525 | -8.947 | 2.7E-39  |
| 4 | rs2159864  | A | 9802702 | 8.103  | 1.9E-36  |
| 4 | rs6826383  | A | 9803602 | 8.089  | 2.1E-36  |
| 4 | rs4697728  | T | 9805736 | 8.150  | 7.2E-37  |
| 4 | rs917825   | A | 9805859 | 8.151  | 6.9E-37  |
| 4 | rs1860903  | A | 9805951 | 8.981  | 6.7E-40  |
| 4 | rs929575   | C | 9805984 | 20.824 | 4.3E-157 |
| 4 | rs917823   | T | 9806323 | -8.170 | 5.4E-37  |
| 4 | rs2080075  | T | 9808546 | 8.156  | 7.4E-37  |
| 4 | rs4697729  | T | 9809499 | -8.153 | 7.9E-37  |
| 4 | rs4697730  | T | 9809594 | 8.151  | 8.3E-37  |
| 4 | rs4697971  | A | 9809958 | -8.148 | 8.3E-37  |
| 4 | rs4697732  | T | 9810971 | -8.147 | 8.4E-37  |
| 4 | rs2868416  | T | 9811672 | -8.148 | 8.1E-37  |
| 4 | rs10489079 | C | 9813061 | 8.972  | 9.8E-40  |
| 4 | rs6858209  | A | 9813255 | 8.140  | 7.8E-37  |
| 4 | rs9283699  | T | 9813287 | -8.138 | 7.7E-37  |
| 4 | rs10030776 | C | 9813573 | 8.118  | 1.3E-36  |
| 4 | rs10030782 | T | 9813594 | -8.113 | 1.4E-36  |
| 4 | rs9990501  | A | 9813691 | 8.102  | 1.6E-36  |
| 4 | rs10939766 | A | 9814068 | 8.099  | 1.6E-36  |
| 4 | rs16894893 | A | 9814693 | -5.374 | 1.1E-17  |
| 4 | rs231      | C | 9814946 | 8.135  | 1.1E-36  |
| 4 | rs17455117 | C | 9815302 | 10.128 | 6.3E-24  |
| 4 | rs6449355  | T | 9815829 | 8.126  | 1.4E-36  |
| 4 | rs17389602 | A | 9816024 | 20.674 | 3.1E-155 |
| 4 | rs6812780  | T | 9817823 | 8.124  | 1.4E-36  |
| 4 | rs6826450  | A | 9817876 | -8.120 | 1.8E-36  |
| 4 | rs6845818  | T | 9817892 | 5.370  | 1.2E-17  |
| 4 | rs6855489  | A | 9817986 | 8.101  | 2.2E-36  |
| 4 | rs11947517 | A | 9818349 | 8.368  | 6.6E-38  |
| 4 | rs4697977  | T | 9819751 | -8.077 | 1.9E-36  |
| 4 | rs2080072  | C | 9844720 | 11.898 | 2.3E-80  |
| 4 | rs11734783 | T | 9849761 | 22.145 | 5.0E-147 |
| 4 | rs11727366 | A | 9853939 | -8.499 | 8.7E-40  |
| 4 | rs10023177 | A | 9854053 | -8.502 | 9.4E-40  |
| 4 | rs1978274  | T | 9854185 | 20.728 | 4.1E-154 |
| 4 | rs7675945  | T | 9854438 | 8.502  | 1.0E-39  |
| 4 | rs6853056  | A | 9854996 | 8.534  | 7.1E-40  |
| 4 | rs10010656 | C | 9855425 | 8.505  | 1.1E-39  |
| 4 | rs11732042 | T | 9855546 | 5.526  | 5.6E-13  |
| 4 | rs4697983  | A | 9856346 | 27.179 | 2.0E-29  |

|   |            |   |         |        |          |
|---|------------|---|---------|--------|----------|
| 4 | rs10939801 | C | 9856610 | -8.149 | 1.9E-35  |
| 4 | rs11730940 | A | 9856991 | -8.151 | 2.0E-35  |
| 4 | rs10025702 | C | 9857272 | -9.172 | 1.7E-39  |
| 4 | rs2024282  | A | 9858786 | 7.626  | 1.1E-22  |
| 4 | rs2024281  | A | 9858849 | -8.158 | 1.9E-35  |
| 4 | rs7661555  | T | 9859124 | -8.886 | 2.5E-37  |
| 4 | rs17392044 | C | 9859438 | 18.128 | 5.3E-82  |
| 4 | rs10171124 | T | 9859497 | 8.462  | 1.7E-38  |
| 4 | rs12509424 | A | 9859601 | 8.879  | 1.5E-36  |
| 4 | rs1860896  | T | 9859875 | 8.077  | 3.5E-35  |
| 4 | rs16895216 | A | 9860081 | 4.374  | 1.7E-11  |
| 4 | rs11735543 | T | 9860750 | 20.869 | 7.4E-142 |
| 4 | rs10029208 | T | 9861103 | -8.468 | 2.0E-38  |
| 4 | rs6838644  | T | 9861969 | -8.884 | 2.1E-36  |
| 4 | rs4522862  | C | 9862113 | 8.469  | 2.3E-38  |
| 4 | rs4697984  | A | 9863648 | 8.473  | 2.3E-38  |
| 4 | rs12513165 | T | 9865675 | 8.901  | 2.1E-36  |
| 4 | rs2192101  | C | 9867155 | 8.470  | 2.8E-38  |
| 4 | rs4697986  | A | 9868066 | -7.988 | 8.9E-34  |
| 4 | rs17406107 | T | 9872478 | 20.382 | 8.7E-150 |
| 4 | rs929577   | A | 9873986 | 8.847  | 4.6E-36  |
| 4 | rs759031   | T | 9874531 | 8.357  | 3.0E-37  |
| 4 | rs17472370 | A | 9879229 | 27.251 | 8.7E-30  |
| 4 | rs10489076 | T | 9879946 | 5.394  | 2.0E-16  |
| 4 | rs12505222 | T | 9880234 | -5.389 | 2.1E-16  |
| 4 | rs7676442  | T | 9881689 | -5.570 | 2.9E-17  |
| 4 | rs10489074 | A | 9881703 | 6.230  | 2.7E-14  |
| 4 | rs10489073 | A | 9881886 | 6.233  | 2.0E-19  |
| 4 | rs17407324 | A | 9882141 | 6.243  | 1.7E-19  |
| 4 | rs10489072 | T | 9882342 | 5.723  | 1.4E-18  |
| 4 | rs10939814 | T | 9882427 | 5.757  | 1.0E-18  |
| 4 | rs10489071 | A | 9882647 | -5.571 | 1.5E-17  |
| 4 | rs2192095  | T | 9883271 | 5.687  | 4.2E-18  |
| 4 | rs4697998  | T | 9883724 | -5.492 | 4.4E-17  |
| 4 | rs4697999  | C | 9884032 | -5.247 | 1.4E-15  |
| 4 | rs17407555 | A | 9884092 | -5.898 | 4.7E-17  |
| 4 | rs1860911  | T | 9884155 | 8.200  | 7.5E-40  |
| 4 | rs1860910  | T | 9884568 | -8.174 | 1.2E-39  |
| 4 | rs10805364 | A | 9884616 | 19.992 | 1.4E-148 |
| 4 | rs6823180  | T | 9884929 | -5.087 | 1.2E-14  |
| 4 | rs6833142  | A | 9885080 | 5.051  | 1.7E-14  |
| 4 | rs10489070 | C | 9885450 | 20.005 | 9.0E-149 |
| 4 | rs12510549 | T | 9885565 | 20.001 | 1.1E-148 |
| 4 | rs4698000  | T | 9886565 | 5.323  | 6.6E-16  |
| 4 | rs6836916  | C | 9886890 | 5.334  | 6.3E-16  |
| 4 | rs16895836 | T | 9887447 | -5.754 | 1.5E-17  |
| 4 | rs7435841  | A | 9887650 | -5.367 | 5.6E-16  |
| 4 | rs10489069 | C | 9887766 | 8.795  | 9.8E-35  |
| 4 | rs10032742 | A | 9887991 | 5.360  | 7.3E-16  |
| 4 | rs4698001  | A | 9888511 | 5.360  | 7.5E-16  |
| 4 | rs17474174 | T | 9890509 | -9.001 | 2.6E-36  |
| 4 | rs16895984 | T | 9893825 | 14.920 | 5.3E-106 |
| 4 | rs4698009  | T | 9894091 | 19.501 | 1.8E-145 |
| 4 | rs4698014  | T | 9895399 | 19.531 | 3.5E-146 |

|   |            |   |         |        |          |
|---|------------|---|---------|--------|----------|
| 4 | rs17409460 | C | 9895525 | 8.888  | 1.9E-36  |
| 4 | rs7685241  | A | 9895763 | -8.279 | 1.3E-36  |
| 4 | rs10939818 | T | 9896060 | -8.283 | 1.2E-36  |
| 4 | rs17475334 | A | 9896268 | -8.893 | 1.7E-36  |
| 4 | rs11932349 | A | 9896349 | 8.280  | 1.2E-36  |
| 4 | rs10489068 | A | 9896366 | 8.056  | 1.2E-33  |
| 4 | rs17475461 | T | 9896775 | -5.764 | 2.6E-15  |
| 4 | rs11937220 | T | 9898972 | 8.253  | 2.2E-36  |
| 4 | rs7692559  | A | 9899824 | -5.532 | 7.0E-19  |
| 4 | rs6449438  | T | 9900161 | 5.537  | 6.5E-19  |
| 4 | rs2024280  | T | 9900911 | 20.128 | 2.7E-152 |
| 4 | rs2192094  | T | 9901066 | -8.869 | 2.4E-36  |
| 4 | rs11731652 | T | 9902082 | 20.113 | 3.5E-149 |
| 4 | rs917827   | T | 9904598 | 7.984  | 3.6E-33  |
| 4 | rs11728055 | A | 9905396 | 19.390 | 4.4E-60  |
| 4 | rs1860907  | T | 9905797 | 8.008  | 2.6E-33  |
| 4 | rs17410735 | T | 9906545 | -8.821 | 5.1E-36  |
| 4 | rs4697744  | A | 9907245 | 8.011  | 6.1E-34  |
| 4 | rs11732729 | A | 9909414 | -5.416 | 2.3E-13  |
| 4 | rs2080077  | A | 9909480 | 8.242  | 3.4E-37  |
| 4 | rs2098236  | C | 9909570 | -8.237 | 3.2E-37  |
| 4 | rs6834574  | A | 9909912 | -8.772 | 2.2E-36  |
| 4 | rs10939829 | T | 9909917 | -8.238 | 2.4E-29  |
| 4 | rs7683755  | A | 9910855 | -8.755 | 2.2E-36  |
| 4 | rs2868937  | T | 9912179 | 19.632 | 4.6E-151 |
| 4 | rs4698023  | A | 9913824 | 19.631 | 4.8E-151 |
| 4 | rs4698025  | A | 9914255 | 8.334  | 5.0E-36  |
| 4 | rs7689060  | C | 9914561 | 19.724 | 4.0E-145 |
| 4 | rs1468692  | T | 9914873 | -5.269 | 3.7E-18  |
| 4 | rs9991653  | A | 9919593 | -5.503 | 1.9E-19  |
| 4 | rs7436833  | T | 9920172 | -9.514 | 7.9E-15  |
| 4 | rs6449449  | T | 9920805 | -7.553 | 1.3E-32  |
| 4 | rs12511337 | A | 9921070 | 19.792 | 2.0E-151 |
| 4 | rs6449451  | C | 9921171 | -7.495 | 3.2E-32  |
| 4 | rs6449452  | T | 9921210 | 7.493  | 3.3E-32  |
| 4 | rs4698028  | A | 9921314 | 7.492  | 3.3E-32  |
| 4 | rs4698029  | C | 9921896 | 19.751 | 5.7E-151 |
| 4 | rs2192093  | T | 9922204 | 5.633  | 1.5E-20  |
| 4 | rs6810699  | A | 9923123 | -7.505 | 2.5E-32  |
| 4 | rs727995   | T | 9923275 | -5.632 | 1.5E-20  |
| 4 | rs714436   | A | 9923765 | 19.882 | 1.1E-154 |
| 4 | rs2868939  | A | 9924019 | 5.556  | 2.1E-14  |
| 4 | rs17477561 | T | 9924194 | -8.367 | 8.8E-34  |
| 4 | rs4698031  | A | 9925019 | 20.020 | 1.6E-157 |
| 4 | rs6449453  | A | 9925932 | -8.394 | 4.4E-34  |
| 4 | rs17418478 | A | 9925949 | 20.559 | 1.8E-142 |
| 4 | rs7666514  | A | 9925977 | 8.080  | 2.6E-32  |
| 4 | rs17418533 | T | 9926039 | 20.049 | 1.4E-157 |
| 4 | rs6449454  | A | 9926479 | -8.131 | 7.6E-37  |
| 4 | rs11722185 | C | 9926580 | 20.065 | 1.2E-157 |
| 4 | rs1860905  | C | 9927934 | -8.286 | 4.6E-38  |
| 4 | rs11737588 | A | 9928105 | 14.728 | 1.5E-07  |
| 4 | rs4698033  | T | 9928669 | -8.290 | 3.8E-38  |

|   |            |   |          |        |          |          |
|---|------------|---|----------|--------|----------|----------|
| 4 | rs4697748  | T | 9928797  | 8.294  | 2.7E-38  |          |
| 4 | rs993173   | T | 9933033  | 9.108  | 7.1E-51  |          |
| 4 | rs9291683  | A | 9933258  | 8.149  | 3.9E-42  |          |
| 4 | rs17478453 | T | 9933410  | 8.706  | 1.2E-36  |          |
| 4 | rs993172   | A | 9933459  | 9.109  | 1.3E-50  |          |
| 4 | rs1558489  | A | 9934587  | -8.703 | 9.3E-47  |          |
| 4 | rs1558488  | A | 9936512  | 5.602  | 1.7E-17  |          |
| 4 | rs4698036  | T | 9940392  | 19.621 | 1.4E-157 |          |
| 4 | rs11729318 | C | 9946017  | 20.395 | 4.9E-160 |          |
| 4 | rs17419612 | T | 9946361  | -8.243 | 8.9E-34  |          |
| 4 | rs1964268  | A | 9947019  | -8.241 | 3.0E-38  |          |
| 4 | rs13142790 | A | 9948138  | -8.164 | 2.0E-33  |          |
| 4 | rs759024   | A | 9948193  | -8.200 | 7.0E-38  |          |
| 4 | rs2007103  | A | 9950353  | 8.279  | 1.0E-38  |          |
| 4 | rs4306950  | T | 9950517  | 8.315  | 5.5E-39  |          |
| 4 | rs984723   | T | 9953722  | 8.267  | 9.9E-39  |          |
| 4 | rs2052165  | T | 9954270  | 10.407 | 4.4E-15  |          |
| 4 | rs17420080 | T | 9954646  | 19.847 | 5.9E-147 |          |
| 4 | rs13109847 | T | 9955343  | -8.474 | 1.7E-35  |          |
| 4 | rs17479487 | A | 9955648  | -8.459 | 1.6E-32  |          |
| 4 | rs2192084  | T | 9956149  | 8.390  | 7.6E-40  |          |
| 4 | rs6849037  | T | 9957529  | -8.435 | 3.6E-40  |          |
| 4 | rs4698037  | A | 9957993  | 8.388  | 7.5E-40  |          |
| 4 | rs17420450 | T | 9959863  | 10.326 | 2.0E-24  |          |
| 4 | rs13145430 | T | 9960046  | -8.488 | 1.4E-35  |          |
| 4 | rs17420513 | A | 9960073  | 8.641  | 2.2E-36  |          |
| 4 | rs17420562 | A | 9960693  | 8.513  | 1.3E-35  |          |
| 4 | rs4697750  | A | 9960804  | 8.312  | 1.0E-38  |          |
| 4 | rs6853659  | A | 9961068  | -8.752 | 2.4E-37  |          |
| 4 | rs4697751  | A | 9961604  | 8.149  | 4.6E-36  |          |
| 4 | rs4698040  | T | 9961648  | 20.582 | 2.5E-158 |          |
| 4 | rs4697752  | T | 9962479  | 8.334  | 8.7E-39  |          |
| 4 | rs10938768 | T | 9963439  | -8.325 | 1.1E-38  |          |
| 4 | rs6838846  | A | 9964627  | -7.743 | 1.3E-29  |          |
| 4 | rs11931317 | A | 9965446  | 8.314  | 1.3E-38  |          |
| 4 | rs7680825  | C | 9967888  | 8.310  | 1.4E-38  |          |
| 4 | rs7681212  | C | 9968062  | 17.557 | 1.7E-126 |          |
| 4 | rs7661209  | A | 9968705  | -8.307 | 1.5E-38  |          |
| 4 | rs4697753  | A | 9975551  | 26.756 | 1.0E-29  |          |
| 4 | rs4698041  | A | 9977333  | 8.293  | 1.8E-38  |          |
| 4 | rs6857135  | A | 9979683  | 8.278  | 1.0E-38  |          |
| 4 | rs6813712  | A | 9979761  | 8.268  | 1.2E-38  |          |
| 4 | rs6849583  | A | 9981888  | -8.260 | 1.3E-38  |          |
| 4 | rs6851536  | T | 9982064  | -8.241 | 1.6E-38  |          |
| 4 | rs11943393 | A | 9983103  | 8.242  | 1.5E-38  |          |
| 4 | rs10938772 | A | 9984426  | 17.355 | 6.0E-127 |          |
| 4 | rs4698043  | T | 9987700  | -8.234 | 1.5E-38  |          |
| 4 | rs7677806  | T | 9992103  | -8.202 | 3.2E-38  | KIAA1729 |
| 4 | rs4302456  | T | 9995772  | -8.735 | 1.1E-37  | KIAA1729 |
| 4 | rs4302457  | T | 9996071  | -8.776 | 7.4E-38  | KIAA1729 |
| 4 | rs10017305 | T | 10010321 | 16.830 | 2.6E-117 | KIAA1729 |
| 4 | rs4463062  | A | 10016092 | -7.876 | 1.1E-33  | KIAA1729 |
| 4 | rs6819959  | A | 10016632 | -5.924 | 1.1E-20  | KIAA1729 |

|   |            |   |          |        |          |                           |          |
|---|------------|---|----------|--------|----------|---------------------------|----------|
| 4 | rs4643800  | T | 10016670 | -      | 15.252   | 5.4E-95                   | KIAA1729 |
| 4 | rs11728025 | C | 10017319 | 14.842 | 2.0E-86  | KIAA1729                  |          |
| 4 | rs7697246  | T | 10017855 | -7.801 | 3.1E-33  | KIAA1729                  |          |
| 4 | rs4698049  | C | 10018868 | 7.801  | 3.2E-33  | KIAA1729                  |          |
| 4 | rs7656072  | A | 10018939 | 5.421  | 4.1E-18  | KIAA1729                  |          |
| 4 | rs4698050  | T | 10019846 | 16.355 | 4.9E-112 | KIAA1729                  |          |
| 4 | rs4610325  | T | 10022266 | 7.928  | 1.3E-33  | KIAA1729                  |          |
| 4 | rs11736389 | T | 10025458 | 16.662 | 1.0E-113 | KIAA1729                  |          |
| 4 | rs13125855 | C | 10027176 | 7.409  | 4.1E-20  | KIAA1729                  |          |
| 4 | rs7691990  | A | 10043557 | 5.227  | 1.9E-14  | MIST;KIAA1729             |          |
| 4 | rs10003864 | T | 10046489 | -3.283 | 1.2E-07  | MIST;KIAA1729             |          |
| 4 | rs4422413  | T | 10052482 | -3.819 | 8.0E-10  | KIAA1729<br>MIST;KIAA1729 |          |
| 4 | rs10938799 | A | 10052523 | -6.348 | 1.6E-19  | KIAA1729<br>MIST;KIAA1729 |          |
| 4 | rs3217     | T | 10053748 | 3.821  | 7.8E-10  | KIAA1729<br>MIST;KIAA1729 |          |
| 4 | rs10016022 | A | 10056004 | -5.236 | 1.6E-14  | KIAA1729<br>MIST;KIAA1729 |          |
| 4 | rs10016702 | A | 10056738 | -5.251 | 2.6E-07  | KIAA1729<br>MIST;KIAA1729 |          |
| 4 | rs7674156  | C | 10061861 | 3.815  | 8.1E-10  | KIAA1729<br>MIST;KIAA1729 |          |
| 4 | rs12019277 | A | 10064092 | 3.816  | 8.1E-10  | KIAA1729<br>MIST;KIAA1729 |          |
| 4 | rs9996284  | C | 10078544 | -4.584 | 2.5E-10  | MIST;KIAA1729             |          |
| 4 | rs10029818 | C | 10081768 | 3.819  | 8.1E-10  | MIST;KIAA1729             |          |
| 4 | rs11732503 | C | 10091712 | 6.015  | 1.7E-19  | MIST;KIAA1729             |          |
| 4 | rs11737650 | A | 10094112 | -5.288 | 9.7E-15  | MIST;KIAA1729             |          |
| 4 | rs11733306 | T | 10097500 | -5.230 | 2.4E-14  | MIST;KIAA1729             |          |
| 4 | rs11737601 | A | 10097666 | 5.949  | 1.2E-18  | MIST;KIAA1729             |          |
| 4 | rs4541501  | T | 10097719 | -5.066 | 1.4E-13  | MIST;KIAA1729             |          |
| 4 | rs13111270 | A | 10098105 | 3.629  | 6.3E-09  | MIST;KIAA1729             |          |
| 4 | rs13130674 | A | 10098698 | -5.033 | 1.2E-13  | MIST;KIAA1729             |          |
| 4 | rs7692088  | C | 10100138 | 4.327  | 8.8E-13  | MIST;KIAA1729             |          |
| 4 | rs9790491  | A | 10102213 | 5.055  | 8.9E-14  | MIST<br>MIST;KIAA1729     |          |
| 4 | rs13115661 | T | 10103059 | -9.672 | 3.3E-11  | MIST<br>MIST;KIAA1729     |          |
| 4 | rs3749558  | T | 10103101 | -5.049 | 9.1E-14  | MIST<br>MIST;KIAA1729     |          |
| 4 | rs7667644  | T | 10104170 | 5.053  | 8.9E-14  | MIST<br>MIST;KIAA1729     |          |
| 4 | rs16869060 | C | 10104888 | 5.342  | 1.4E-16  | MIST<br>MIST;KIAA1729     |          |
| 4 | rs13142053 | C | 10105339 | -4.669 | 2.0E-11  | MIST<br>MIST;KIAA1729     |          |
| 4 | rs10033825 | T | 10105890 | 3.551  | 1.4E-08  | MIST<br>MIST;KIAA1729     |          |
| 4 | rs7698826  | A | 10106521 | 4.222  | 3.1E-12  | MIST<br>MIST;KIAA1729     |          |
| 4 | rs12504795 | T | 10108442 | 5.619  | 6.6E-17  | MIST<br>MIST;KIAA1729     |          |
| 4 | rs17467273 | T | 10109529 | -3.504 | 1.9E-08  | MIST<br>MIST;KIAA1729     |          |
| 4 | rs13109939 | T | 10110723 | 5.092  | 6.8E-14  | MIST<br>MIST;KIAA1729     |          |
| 4 | rs6833095  | A | 10115697 | 3.650  | 4.0E-09  | MIST<br>MIST;KIAA1729     |          |
| 4 | rs11734599 | C | 10116588 | -5.192 | 3.2E-14  | MIST<br>MIST;KIAA1729     |          |
| 4 | rs887112   | T | 10117082 | 6.674  | 2.5E-08  | MIST<br>MIST;KIAA1729     |          |
| 4 | rs13141385 | A | 10117502 | 3.207  | 2.1E-07  | MIST<br>MIST;KIAA1729     |          |
| 4 | rs2868941  | T | 10118797 | -5.737 | 2.5E-17  | MIST<br>MIST;KIAA1729     |          |
| 4 | rs11929850 | C | 10119148 | 6.659  | 2.9E-08  | MIST<br>MIST;KIAA1729     |          |
| 4 | rs13108998 | T | 10119967 | 3.426  | 4.2E-08  | MIST<br>MIST;KIAA1729     |          |
| 4 | rs1004327  | T | 10120581 | 4.971  | 2.9E-14  | MIST<br>MIST;KIAA1729     |          |
| 4 | rs12508358 | T | 10121336 | -5.065 | 1.1E-14  | MIST<br>MIST;KIAA1729     |          |
| 4 | rs13125670 | T | 10122170 | 4.990  | 2.3E-16  | MIST<br>MIST;KIAA1729     |          |
| 4 | rs12499142 | A | 10123336 | -5.008 | 3.5E-13  | MIST<br>MIST;KIAA1729     |          |
| 4 | rs2868942  | T | 10123666 | -5.090 | 8.7E-15  | MIST<br>MIST;KIAA1729     |          |
| 4 | rs16869379 | T | 10123779 | 5.424  | 6.6E-17  | MIST<br>MIST;KIAA1729     |          |
| 4 | rs10034180 | A | 10127623 | 3.902  | 1.1E-10  | MIST<br>MIST;KIAA1729     |          |
| 4 | rs16869430 | T | 10128524 | 4.849  | 1.1E-15  | MIST<br>MIST              |          |



|   |            |   |          |        |         |      |                 |
|---|------------|---|----------|--------|---------|------|-----------------|
| 4 | rs2041215  | T | 10129080 | -3.919 | 1.0E-10 | MIST | MIST            |
| 4 | rs13125086 | T | 10129791 | 9.758  | 1.4E-11 | MIST | MIST            |
| 4 | rs16869474 | C | 10130070 | 4.851  | 1.1E-15 | MIST | MIST            |
| 4 | rs2012249  | T | 10130256 | 10.701 | 1.7E-07 | MIST | MIST            |
| 4 | rs2041216  | T | 10132188 | -3.837 | 2.2E-10 | MIST | MIST            |
| 4 | rs997219   | A | 10133769 | -3.795 | 4.4E-10 | MIST | MIST            |
| 4 | rs2108878  | T | 10136440 | 6.124  | 3.6E-20 | MIST | MIST            |
| 4 | rs12641877 | A | 10137324 | 6.055  | 7.6E-20 | MIST | MIST            |
| 4 | rs2286463  | A | 10141356 | 5.517  | 3.4E-15 | MIST | MIST            |
| 4 | rs2286465  | A | 10141732 | 5.812  | 8.4E-17 | MIST | MIST            |
| 4 | rs10488948 | A | 10145642 | -5.150 | 3.5E-12 | MIST | MIST            |
| 4 | rs4466013  | A | 88979437 | 15.318 | 2.1E-09 | MEPE | MEPE;IBSP       |
| 4 | rs6854498  | A | 88995784 | 14.868 | 2.1E-09 |      | MEPE;IBSP       |
| 4 | rs6854361  | A | 88995888 | 14.864 | 2.1E-09 |      | MEPE;IBSP       |
| 4 | rs17842205 | A | 89068576 | 10.022 | 1.1E-17 |      | SPP1            |
| 4 | rs4693920  | T | 89083799 | 10.771 | 3.4E-19 |      | SPP1            |
| 4 | rs2728123  | T | 89089819 | 10.580 | 3.5E-18 |      | PKD2;SPP1       |
| 4 | rs17013584 | A | 89091987 | 7.631  | 1.3E-18 |      | PKD2;SPP1       |
| 4 | rs2728119  | A | 89096555 | -9.460 | 4.6E-24 |      | PKD2;SPP1       |
| 4 | rs4490426  | A | 89099546 | -4.801 | 9.1E-13 |      | PKD2;SPP1       |
| 4 | rs10516798 | T | 89102561 | 4.741  | 1.2E-12 |      | PKD2;SPP1       |
| 4 | rs11730059 | A | 89106351 | 11.195 | 7.4E-27 |      | PKD2;SPP1       |
| 4 | rs12641001 | T | 89107964 | -4.926 | 2.4E-12 |      | PKD2;SPP1       |
| 4 | rs10516800 | C | 89110614 | -4.952 | 2.1E-12 |      | PKD2;SPP1       |
| 4 | rs6813526  | T | 89113259 | 4.889  | 3.9E-13 |      | PKD2;SPP1       |
| 4 | rs2853749  | T | 89116838 | -4.935 | 2.0E-13 | SPP1 | PKD2;SPP1       |
| 4 | rs7685225  | T | 89125482 | 3.957  | 4.1E-10 |      | PKD2;SPP1       |
| 4 | rs6818927  | T | 89126281 | -3.953 | 4.3E-10 |      | PKD2;SPP1       |
| 4 | rs4128340  | A | 89127160 | -3.958 | 4.1E-10 |      | PKD2;SPP1       |
| 4 | rs6532041  | A | 89128057 | -4.014 | 2.3E-10 |      | PKD2;SPP1       |
| 4 | rs6832511  | A | 89128112 | -3.962 | 3.8E-10 |      | PKD2;SPP1       |
| 4 | rs6838095  | A | 89128460 | -3.945 | 4.4E-10 |      | PKD2;SPP1       |
| 4 | rs12509864 | T | 89128790 | 3.964  | 3.9E-10 |      | PKD2;SPP1       |
| 4 | rs11938988 | C | 89129137 | -3.939 | 7.1E-10 |      | PKD2;SPP1       |
| 4 | rs2725234  | T | 89151296 | 11.610 | 3.5E-30 | PKD2 | PKD2;SPP1       |
| 4 | rs12503776 | T | 89151488 | -3.968 | 4.4E-09 | PKD2 | PKD2;SPP1       |
| 4 | rs2728113  | A | 89158760 | 11.602 | 2.8E-30 | PKD2 | PKD2;SPP1       |
| 4 | rs2725227  | T | 89163535 | 3.140  | 2.7E-07 | PKD2 | PKD2;SPP1       |
| 4 | rs13149278 | A | 89170414 | -3.928 | 1.2E-09 | PKD2 | PKD2;SPP1       |
| 4 | rs2725225  | T | 89171100 | -3.161 | 2.2E-07 | PKD2 | PKD2;SPP1;ABCG2 |
| 4 | rs2728110  | A | 89171907 | -3.160 | 2.4E-07 | PKD2 | PKD2;SPP1;ABCG2 |
| 4 | rs17786456 | T | 89176586 | 3.792  | 4.8E-09 | PKD2 | PKD2;SPP1;ABCG2 |
| 4 | rs2728109  | A | 89176747 | 12.440 | 5.2E-33 | PKD2 | PKD2;SPP1;ABCG2 |
| 4 | rs2725217  | A | 89179282 | 12.533 | 2.3E-33 | PKD2 | PKD2;SPP1;ABCG2 |
| 4 | rs2725215  | T | 89180595 | 13.078 | 1.7E-35 | PKD2 | PKD2;SPP1;ABCG2 |
| 4 | rs2725212  | A | 89187737 | 10.288 | 4.6E-27 | PKD2 | PKD2;ABCG2      |
| 4 | rs2725211  | T | 89189399 | 12.080 | 5.3E-32 | PKD2 | PKD2;ABCG2      |
| 4 | rs2728106  | A | 89191075 | 10.197 | 8.1E-27 | PKD2 | PKD2;ABCG2      |
| 4 | rs2728104  | T | 89192030 | 11.962 | 1.2E-32 | PKD2 | PKD2;ABCG2      |
| 4 | rs2725210  | A | 89192451 | 10.038 | 1.3E-26 | PKD2 | PKD2;ABCG2      |
| 4 | rs2728099  | T | 89194762 | 13.417 | 2.4E-34 | PKD2 | PKD2;ABCG2      |

|   |            |   |          |        |         |       |             |
|---|------------|---|----------|--------|---------|-------|-------------|
| 4 | rs2725207  | A | 89198553 | 10.206 | 8.9E-27 | PKD2  | PKD2;ABCG2  |
| 4 | rs2728133  | T | 89200714 | 10.250 | 6.5E-27 | PKD2  | PKD2;ABCG2  |
| 4 | rs2728132  | A | 89201485 | 10.272 | 5.9E-27 | PKD2  | PKD2;ABCG2  |
| 4 | rs2725205  | A | 89204735 | 10.277 | 5.7E-27 | PKD2  | PKD2;ABCG2  |
| 4 | rs11938025 | A | 89206300 | 3.667  | 5.3E-08 | PKD2  | PKD2;ABCG2  |
| 4 | rs4336187  | A | 89206940 | 10.268 | 7.5E-27 | PKD2  | PKD2;ABCG2  |
| 4 | rs2725203  | T | 89214819 | 10.132 | 1.9E-26 | PKD2  | PKD2;ABCG2  |
| 4 | rs2728121  | T | 89216126 | 12.470 | 8.6E-34 | PKD2  | PKD2;ABCG2  |
| 4 | rs10965    | A | 89217107 | -3.724 | 4.2E-08 | PKD2  | PKD2;ABCG2  |
| 4 | rs2728126  | A | 89218246 | 13.063 | 4.6E-39 |       | PKD2;ABCG2  |
| 4 | rs2728125  | A | 89220917 | 13.702 | 2.1E-41 |       | PKD2;ABCG2  |
| 4 | rs2231164  | T | 89234881 | 11.639 | 4.1E-36 | ABCG2 | PKD2;ABCG2  |
| 4 | rs2231156  | A | 89239451 | 14.579 | 4.1E-45 | ABCG2 | PKD2;ABCG2  |
| 4 | rs4148157  | A | 89239958 | 14.605 | 2.9E-45 | ABCG2 | PKD2;ABCG2  |
| 4 | rs4693924  | A | 89242248 | 14.557 | 4.2E-45 | ABCG2 | PKD2;ABCG2  |
| 4 | rs2231148  | A | 89247502 | -4.179 | 2.1E-09 | ABCG2 | PKD2;ABCG2  |
| 4 | rs2054576  | A | 89247799 | 14.955 | 2.8E-46 | ABCG2 | PKD2;ABCG2  |
| 4 | rs12505410 | T | 89249865 | 5.534  | 4.6E-16 | ABCG2 | PKD2;ABCG2  |
| 4 | rs2622621  | C | 89249944 | -7.411 | 1.6E-27 | ABCG2 | PKD2;ABCG2  |
| 4 | rs13120400 | T | 89252551 | 6.014  | 2.4E-18 | ABCG2 | PKD2;ABCG2  |
| 4 | rs1481012  | A | 89258106 | 17.855 | 8.1E-74 | ABCG2 | PKD2;ABCG2  |
| 4 | rs2199936  | A | 89264355 | 18.079 | 1.2E-75 | ABCG2 | PKD2;ABCG2  |
| 4 | rs2231142  | T | 89271347 | 17.648 | 2.5E-75 | ABCG2 | PKD2;ABCG2  |
| 4 | rs4148155  | A | 89273691 | 17.689 | 2.1E-75 | ABCG2 | PKD2;ABCG2  |
| 4 | rs13137622 | T | 89281537 | -5.916 | 2.2E-18 | ABCG2 | ABCG2       |
| 4 | rs3114018  | A | 89283605 | -5.684 | 3.3E-21 | ABCG2 | ABCG2       |
| 4 | rs3109823  | T | 89283626 | 5.329  | 6.4E-15 | ABCG2 | ABCG2       |
| 4 | rs2622626  | A | 89285739 | 5.752  | 7.5E-21 | ABCG2 | ABCG2       |
| 4 | rs17731799 | T | 89287479 | 6.699  | 1.3E-26 | ABCG2 | ABCG2       |
| 4 | rs2622624  | T | 89288430 | -6.708 | 1.1E-26 | ABCG2 | ABCG2       |
| 4 | rs2622604  | T | 89297948 | -5.213 | 7.9E-14 | ABCG2 | ABCG2       |
| 4 | rs2622605  | T | 89298410 | -6.897 | 1.5E-28 | ABCG2 | ABCG2       |
| 4 | rs3114020  | T | 89302690 | -6.895 | 2.4E-28 |       | ABCG2       |
| 4 | rs10011796 | T | 89309901 | 5.656  | 5.1E-20 |       | ABCG2       |
| 4 | rs10009618 | T | 89313032 | -5.618 | 7.6E-20 |       | ABCG2       |
| 4 | rs1481017  | T | 89316501 | -5.650 | 6.1E-20 |       | ABCG2       |
| 4 | rs11724427 | A | 89322196 | -4.881 | 1.4E-09 |       | ABCG2       |
| 4 | rs6821227  | T | 89323712 | 4.852  | 1.4E-09 |       | ABCG2       |
| 4 | rs6821239  | A | 89323775 | -4.907 | 1.2E-09 |       | ABCG2       |
| 4 | rs9784454  | T | 89326514 | 4.645  | 5.9E-09 |       | ABCG2       |
| 4 | rs6532053  | A | 89328283 | -4.655 | 5.4E-09 |       | ABCG2       |
| 4 | rs2127863  | T | 89330492 | -4.609 | 7.2E-09 |       | ABCG2       |
| 4 | rs4560364  | A | 89335202 | -4.650 | 5.7E-09 |       | ABCG2       |
| 4 | rs13108900 | C | 89335726 | -4.689 | 4.4E-09 |       | ABCG2       |
| 4 | rs4693935  | A | 89358299 | -3.879 | 1.9E-08 |       | PPM1K;ABCG2 |
| 4 | rs9307048  | T | 89368594 | -4.131 | 5.0E-10 |       | PPM1K       |
| 4 | rs13120254 | A | 89379585 | 3.797  | 5.1E-09 |       | PPM1K       |
| 4 | rs17014018 | A | 89467059 | 7.918  | 2.3E-08 |       | HERC6;PPM1K |
| 4 | rs4693211  | T | 89468085 | -7.631 | 8.3E-08 |       | HERC6;PPM1K |
| 4 | rs12512051 | T | 89471092 | 7.241  | 1.5E-07 |       | HERC6;PPM1K |
| 4 | rs7436324  | T | NA       | 24.140 | 5.8E-71 |       |             |

|   |            |   |          |        |         |         |                                          |  |
|---|------------|---|----------|--------|---------|---------|------------------------------------------|--|
| 4 | rs6449151  | A | NA       | -      | 12.531  | 4.5E-28 |                                          |  |
| 4 | rs13352078 | A | NA       | -      | 18.261  | 9.1E-19 |                                          |  |
| 4 | rs7376519  | A | NA       | 10.029 | 3.5E-16 |         |                                          |  |
| 4 | rs11943386 | A | NA       | 10.025 | 3.6E-16 |         |                                          |  |
| 4 | rs7375547  | T | NA       | 10.085 | 5.1E-16 |         |                                          |  |
| 4 | rs7375191  | A | NA       | 10.173 | 6.0E-16 |         |                                          |  |
| 4 | rs7378384  | T | NA       | -9.711 | 1.5E-15 |         |                                          |  |
| 4 | rs7377456  | C | NA       | -9.709 | 1.5E-15 |         |                                          |  |
| 4 | rs11731261 | A | NA       | -9.588 | 8.3E-14 |         |                                          |  |
| 4 | rs11728274 | A | NA       | -7.309 | 2.7E-10 |         |                                          |  |
| 4 | rs6532038  | A | NA       | 9.633  | 2.2E-08 |         |                                          |  |
| 4 | rs12696932 | T | NA       | -6.450 | 9.3E-08 |         |                                          |  |
| 4 | rs7376184  | T | NA       | -7.201 | 1.8E-07 |         |                                          |  |
| 6 | rs611555   | T | 7020821  | 3.707  | 1.0E-08 |         | RREB1                                    |  |
| 6 | rs501510   | A | 7026839  | 3.756  | 2.4E-07 |         | RREB1                                    |  |
| 6 | rs13213992 | T | 7028217  | -3.628 | 1.7E-08 |         | RREB1                                    |  |
| 6 | rs675209   | T | 7047083  | 4.388  | 1.0E-09 |         | RREB1                                    |  |
| 6 | rs1285875  | C | 7060926  | -3.771 | 9.3E-08 | RREB1   | RREB1                                    |  |
| 6 | rs11755724 | A | 7063989  | 3.578  | 1.4E-08 | RREB1   | RREB1                                    |  |
| 6 | rs6933716  | T | 7070708  | 3.536  | 2.8E-07 | RREB1   | RREB1                                    |  |
| 6 | rs687467   | A | 7073075  | 3.921  | 3.6E-08 | RREB1   | RREB1                                    |  |
| 6 | rs622404   | A | 7075595  | 3.910  | 3.8E-08 | RREB1   | RREB1                                    |  |
| 6 | rs630258   | T | 7079400  | 3.904  | 4.0E-08 | RREB1   | RREB1                                    |  |
| 6 | rs1285879  | T | 7082362  | 3.893  | 4.2E-08 | RREB1   | RREB1                                    |  |
| 6 | rs665723   | T | 7084063  | -3.889 | 4.6E-08 | RREB1   | RREB1                                    |  |
| 6 | rs1334577  | A | 7156750  | 3.713  | 2.3E-07 | RREB1   | RREB1                                    |  |
| 6 | rs301395   | A | 25594605 | 3.329  | 3.1E-07 | LRRC16  | LRRC16                                   |  |
| 6 | rs4712944  | A | 25596244 | -3.329 | 2.7E-07 | LRRC16  | LRRC16                                   |  |
| 6 | rs12528639 | C | 25599786 | 3.386  | 1.5E-07 | LRRC16  | LRRC16                                   |  |
| 6 | rs1034050  | A | 25600343 | -3.401 | 1.3E-07 | LRRC16  | LRRC16                                   |  |
| 6 | rs2205936  | C | 25793471 | 3.956  | 1.3E-09 | SCGN    | HIST1H2BA;HIST1H2AA;SCGN                 |  |
| 6 | rs2294346  | C | 25797466 | 4.013  | 3.6E-10 | SCGN    | HIST1H2BA;HIST1H2AA;SCGN                 |  |
| 6 | rs4419666  | T | 25801253 | -4.270 | 4.3E-10 | SCGN    | HIST1H2BA;HIST1H2AA;SCGN                 |  |
| 6 | rs4409177  | T | 25802470 | 4.236  | 1.8E-10 | SCGN    | HIST1H2BA;HIST1H2AA;SCGN                 |  |
| 6 | rs9467570  | A | 25807262 | -4.225 | 1.7E-10 | SCGN    | HIST1H2BA;HIST1H2AA;SLC17A4;SCGN         |  |
| 6 | rs9467573  | A | 25812169 | -4.213 | 1.6E-10 |         | HIST1H2BA;HIST1H2AA;SLC17A4;SCGN         |  |
| 6 | rs9467574  | C | 25813697 | 4.213  | 1.6E-10 |         | HIST1H2BA;HIST1H2AA;SLC17A4;SCGN         |  |
| 6 | rs6456688  | T | 25816939 | 3.776  | 7.2E-09 |         | HIST1H2BA;HIST1H2AA;SLC17A4;SCGN         |  |
| 6 | rs6456693  | C | 25818066 | 4.130  | 7.9E-11 |         | HIST1H2BA;HIST1H2AA;SLC17A4;SCGN         |  |
| 6 | rs6912391  | C | 25818742 | 3.932  | 5.4E-10 |         | HIST1H2BA;HIST1H2AA;SLC17A4;SCGN         |  |
| 6 | rs9461204  | A | 25826445 | 4.262  | 6.1E-11 |         | HIST1H2BA;HIST1H2AA;SLC17A4;SCGN         |  |
| 6 | rs12215823 | C | 25834053 | 4.064  | 9.0E-11 |         | SLC17A1;HIST1H2BA;HIST1H2AA;SLC17A4;SCGN |  |
| 6 | rs9461210  | A | 25842052 | 4.314  | 4.8E-11 |         | SLC17A1;HIST1H2BA;HIST1H2AA;SLC17A4;SCGN |  |
| 6 | rs9467591  | A | 25850678 | 4.252  | 1.6E-09 |         | SLC17A1;HIST1H2BA;HIST1H2AA;SLC17A4;SCGN |  |
| 6 | rs10498728 | A | 25859299 | -4.278 | 9.0E-11 |         | SLC17A1;HIST1H2BA;HIST1H2AA;SLC17A4;SCGN |  |
| 6 | rs12207270 | A | 25859700 | -4.278 | 9.0E-11 |         | SLC17A1;HIST1H2BA;HIST1H2AA;SLC17A4;SCGN |  |
| 6 | rs1892256  | T | 25862250 | -4.267 | 1.0E-10 |         | SLC17A1;HIST1H2BA;HIST1H2AA;SLC17A4;SCGN |  |
| 6 | rs13194155 | T | 25863487 | -4.252 | 1.2E-10 | SLC17A4 | SLC17A1;HIST1H2BA;HIST1H2AA;SLC17A4;SCGN |  |
| 6 | rs16890999 | A | 25863562 | 4.242  | 1.3E-10 | SLC17A4 | HIST1H2AA;SLC17A1;SLC17A4;HIST1H2BA;SCGN |  |
| 6 | rs2328893  | A | 25878218 | 4.740  | 1.0E-12 | SLC17A4 | SLC17A1;HIST1H2BA;HIST1H2AA;SLC17A4      |  |
| 6 | rs2275906  | A | 25881788 | 4.715  | 8.9E-08 | SLC17A4 | SLC17A1;HIST1H2BA;HIST1H2AA;SLC17A4      |  |
| 6 | rs11754288 | A | 25884928 | -5.874 | 2.2E-22 | SLC17A4 | SLC17A1;HIST1H2BA;HIST1H2AA;SLC17A4      |  |
| 6 | rs12201071 | T | 25886034 | -4.293 | 2.7E-12 | SLC17A4 | SLC17A1;HIST1H2BA;HIST1H2AA;SLC17A4      |  |
| 6 | rs10946798 | T | 25889832 | 4.288  | 2.4E-12 |         | SLC17A1;HIST1H2BA;HIST1H2AA;SLC17A4      |  |

|   |            |   |          |        |         |         |                                             |
|---|------------|---|----------|--------|---------|---------|---------------------------------------------|
| 6 | rs3923     | T | 25891294 | 4.076  | 3.1E-11 | SLC17A1 | SLC17A1;HIST1H2BA;HIST1H2AA;SLC17A4         |
| 6 | rs3757131  | T | 25891888 | -5.877 | 2.3E-22 | SLC17A1 | SLC17A1;HIST1H2BA;HIST1H2AA;SLC17A4         |
| 6 | rs13197601 | A | 25893914 | -5.882 | 2.2E-22 | SLC17A1 | SLC17A1;HIST1H2BA;HIST1H2AA;SLC17A4;SLC17A3 |
| 6 | rs3799344  | T | 25894972 | -5.603 | 1.4E-20 | SLC17A1 | SLC17A1;HIST1H2BA;SLC17A4;SLC17A3           |
| 6 | rs2096386  | A | 25895796 | -4.020 | 1.3E-10 | SLC17A1 | SLC17A1;SLC17A4;SLC17A3                     |
| 6 | rs9393670  | A | 25897040 | 4.489  | 2.7E-13 | SLC17A1 | SLC17A1;SLC17A4;SLC17A3                     |
| 6 | rs10214468 | A | 25897369 | 5.222  | 3.9E-08 | SLC17A1 | SLC17A1;SLC17A4;SLC17A3                     |
| 6 | rs3799346  | T | 25899333 | 5.359  | 2.7E-14 | SLC17A1 | SLC17A1;SLC17A4;SLC17A3                     |
| 6 | rs942377   | T | 25900271 | -5.362 | 2.6E-14 | SLC17A1 | SLC17A1;SLC17A4;SLC17A3                     |
| 6 | rs2762353  | A | 25902410 | -6.116 | 6.2E-24 | SLC17A1 | SLC17A1;SLC17A4;SLC17A3                     |
| 6 | rs1165215  | A | 25906911 | 6.250  | 5.9E-25 | SLC17A1 | SLC17A1;SLC17A4;SLC17A3                     |
| 6 | rs1165209  | A | 25909298 | 6.250  | 5.1E-25 | SLC17A1 | SLC17A1;SLC17A4;SLC17A3                     |
| 6 | rs1324082  | T | 25909950 | 5.355  | 2.6E-14 | SLC17A1 | SLC17A1;SLC17A4;SLC17A3                     |
| 6 | rs9467604  | A | 25912981 | -5.395 | 1.5E-14 | SLC17A1 | SLC17A1;SLC17A4;SLC17A3                     |
| 6 | rs9467606  | A | 25917197 | -5.500 | 2.9E-07 | SLC17A1 | SLC17A1;SLC17A4;SLC17A3                     |
| 6 | rs1575534  | T | 25919383 | 5.442  | 7.3E-15 | SLC17A1 | SLC17A1;SLC17A4;SLC17A3                     |
| 6 | rs942378   | A | 25920438 | 5.447  | 7.4E-15 | SLC17A1 | SLC17A1;SLC17A4;SLC17A3                     |
| 6 | rs1165196  | A | 25921129 | 6.205  | 5.0E-25 | SLC17A1 | SLC17A1;SLC17A4;SLC17A3                     |
| 6 | rs7753366  | A | 25925497 | 5.448  | 7.0E-15 | SLC17A1 | SLC17A1;SLC17A4;SLC17A3                     |
| 6 | rs1165153  | A | 25925768 | -6.199 | 6.3E-25 | SLC17A1 | SLC17A1;SLC17A4;SLC17A3                     |
| 6 | rs1185567  | A | 25926567 | -6.195 | 6.8E-25 | SLC17A1 | SLC17A1;SLC17A4;SLC17A3                     |
| 6 | rs1183200  | C | 25926625 | 6.190  | 7.3E-25 | SLC17A1 | SLC17A1;SLC17A4;SLC17A3                     |
| 6 | rs12182983 | A | 25926734 | 5.380  | 1.5E-13 | SLC17A1 | SLC17A1;SLC17A4;SLC17A3                     |
| 6 | rs1165152  | A | 25926745 | -6.184 | 8.3E-25 | SLC17A1 | SLC17A1;SLC17A4;SLC17A3                     |
| 6 | rs6913879  | T | 25928407 | -5.424 | 8.7E-15 | SLC17A1 | SLC17A1;SLC17A4;SLC17A3                     |
| 6 | rs1165151  | T | 25929595 | -6.058 | 1.1E-23 | SLC17A1 | SLC17A1;SLC17A4;SLC17A3                     |
| 6 | rs3799352  | T | 25930599 | 6.052  | 1.3E-23 | SLC17A1 | SLC17A1;SLC17A4;SLC17A3                     |
| 6 | rs1183201  | A | 25931423 | -6.050 | 1.4E-23 | SLC17A1 | SLC17A1;SLC17A4;SLC17A3                     |
| 6 | rs6456703  | T | 25934098 | 5.525  | 6.0E-15 | SLC17A1 | SLC17A1;SLC17A4;SLC17A3                     |
| 6 | rs1408268  | A | 25934965 | 5.518  | 6.6E-15 | SLC17A1 | SLC17A1;SLC17A4;SLC17A3                     |
| 6 | rs1165178  | A | 25935495 | -6.029 | 1.6E-23 | SLC17A1 | SLC17A1;SLC17A4;SLC17A3                     |
| 6 | rs765285   | C | 25936221 | 5.946  | 6.1E-23 | SLC17A1 | SLC17A1;SLC17A4;SLC17A3                     |
| 6 | rs13200784 | A | 25937612 | -5.448 | 1.3E-14 | SLC17A1 | SLC17A1;SLC17A4;SLC17A3                     |
| 6 | rs1165177  | A | 25937638 | 5.927  | 7.6E-23 | SLC17A1 | SLC17A1;SLC17A4;SLC17A3                     |
| 6 | rs1165176  | A | 25938277 | -5.911 | 8.7E-23 | SLC17A1 | SLC17A1;SLC17A4;SLC17A3                     |
| 6 | rs1185569  | A | 25939582 | -5.866 | 4.1E-16 | SLC17A1 | SLC17A1;SLC17A4;SLC17A3                     |
| 6 | rs1185568  | A | 25942407 | 5.911  | 9.2E-23 | SLC17A1 | SLC17A1;SLC17A4;SLC17A3                     |
| 6 | rs1184803  | T | 25942637 | -5.909 | 9.5E-23 | SLC17A1 | SLC17A1;SLC17A4;SLC17A3                     |
| 6 | rs1185978  | A | 25943874 | -6.001 | 9.7E-23 | SLC17A1 | SLC17A1;SLC17A4;SLC17A3                     |
| 6 | rs1165182  | A | 25945808 | -5.902 | 1.0E-22 | SLC17A1 | SLC17A1;SLC17A4;SLC17A3                     |
| 6 | rs6905614  | A | 25948464 | 5.724  | 3.8E-21 | SLC17A1 | SLC17A1;SLC17A3                             |
| 6 | rs1408273  | A | 25948925 | -5.893 | 1.1E-22 | SLC17A1 | SLC17A1;SLC17A3                             |
| 6 | rs1324088  | A | 25949101 | 4.973  | 1.4E-07 | SLC17A1 | SLC17A1;SLC17A3                             |
| 6 | rs1324087  | A | 25949387 | 4.915  | 1.5E-07 | SLC17A1 | SLC17A1;SLC17A3                             |
| 6 | rs9393672  | T | 25950584 | -5.866 | 1.4E-22 | SLC17A1 | SLC17A1;SLC17A3                             |
| 6 | rs1165148  | T | 25952689 | 5.353  | 2.7E-14 | SLC17A1 | SLC17A1;SLC17A3                             |
| 6 | rs942379   | A | 25957599 | -5.749 | 9.9E-22 | SLC17A3 | SLC17A1;SLC17A3                             |
| 6 | rs1165189  | A | 25957758 | -5.355 | 2.6E-14 | SLC17A3 | SLC17A1;SLC17A3                             |
| 6 | rs1165187  | T | 25959348 | -5.363 | 2.6E-14 | SLC17A3 | SLC17A1;SLC17A3                             |
| 6 | rs1780969  | A | 25966411 | 5.379  | 2.1E-14 | SLC17A3 | SLC17A1;SLC17A2;SLC17A3                     |
| 6 | rs1179087  | T | 25966683 | 5.458  | 3.4E-13 | SLC17A3 | SLC17A1;SLC17A2;SLC17A3                     |
| 6 | rs1177441  | A | 25967392 | -4.909 | 1.9E-07 | SLC17A3 | SLC17A1;SLC17A2;SLC17A3                     |
| 6 | rs1165168  | A | 25967487 | -4.907 | 1.9E-07 | SLC17A3 | SLC17A1;SLC17A2;SLC17A3                     |
| 6 | rs1182814  | T | 25967533 | -5.362 | 2.4E-14 | SLC17A3 | SLC17A1;SLC17A2;SLC17A3                     |
| 6 | rs1165167  | A | 25968667 | -5.337 | 2.9E-14 | SLC17A3 | SLC17A1;SLC17A2;SLC17A3                     |

|    |           |   |          |        |         |         |                                                                                              |
|----|-----------|---|----------|--------|---------|---------|----------------------------------------------------------------------------------------------|
| 6  | rs1165165 | T | 25970445 | 5.225  | 4.2E-13 | SLC17A3 | SLC17A1;SLC17A2;SLC17A3                                                                      |
| 6  | rs1165164 | A | 25971460 | 5.515  | 2.5E-13 | SLC17A3 | SLC17A1;SLC17A2;SLC17A3                                                                      |
| 6  | rs1165162 | T | 25971584 | 5.329  | 3.1E-14 | SLC17A3 | SLC17A1;SLC17A2;SLC17A3                                                                      |
| 6  | rs1165161 | T | 25972341 | 5.372  | 2.2E-14 | SLC17A3 | SLC17A1;SLC17A2;SLC17A3                                                                      |
| 6  | rs1165160 | A | 25972435 | -5.768 | 2.2E-21 | SLC17A3 | SLC17A1;SLC17A2;SLC17A3                                                                      |
| 6  | rs1165159 | A | 25972604 | -5.401 | 1.8E-14 | SLC17A3 | SLC17A1;SLC17A2;SLC17A3                                                                      |
| 6  | rs1184498 | C | 25972861 | 5.021  | 9.2E-08 | SLC17A3 | SLC17A1;SLC17A2;SLC17A3                                                                      |
| 6  | rs1165158 | A | 25972877 | 5.428  | 1.3E-14 | SLC17A3 | SLC17A1;SLC17A2;SLC17A3                                                                      |
| 6  | rs1165207 | T | 25973245 | -5.821 | 9.3E-22 | SLC17A3 | SLC17A1;SLC17A2;SLC17A3                                                                      |
| 6  | rs1165206 | A | 25975545 | 4.108  | 4.3E-11 | SLC17A3 | SLC17A1;SLC17A2;SLC17A3                                                                      |
| 6  | rs1184804 | T | 25976205 | -5.846 | 7.2E-22 | SLC17A3 | SLC17A1;SLC17A2;SLC17A3                                                                      |
| 6  | rs548987  | C | 25977350 | 5.198  | 2.6E-08 | SLC17A3 | SLC17A1;SLC17A2;SLC17A3                                                                      |
| 6  | rs523383  | A | 25977827 | -5.206 | 2.6E-08 | SLC17A3 | SLC17A1;SLC17A2;SLC17A3                                                                      |
| 6  | rs1165205 | A | 25978521 | 5.851  | 6.0E-22 | SLC17A3 | SLC17A1;SLC17A2;SLC17A3                                                                      |
| 6  | rs555460  | T | 25978634 | 5.192  | 2.8E-08 | SLC17A3 | SLC17A1;SLC17A2;SLC17A3                                                                      |
| 6  | rs556339  | T | 25978724 | 5.635  | 2.2E-15 | SLC17A3 | SLC17A1;SLC17A2;SLC17A3                                                                      |
| 6  | rs972087  | A | 25980558 | -5.413 | 2.0E-07 | SLC17A3 | SLC17A1;SLC17A2;SLC17A3                                                                      |
| 6  | rs501220  | A | 25981004 | 5.242  | 2.8E-08 | SLC17A3 | SLC17A1;SLC17A2;SLC17A3                                                                      |
| 6  | rs1165201 | A | 25982802 | -3.756 | 1.3E-08 |         | SLC17A1;SLC17A2;SLC17A3                                                                      |
| 6  | rs603089  | A | 25985949 | 4.056  | 2.5E-10 |         | SLC17A1;SLC17A2;SLC17A3                                                                      |
| 6  | rs629835  | T | 25987309 | -3.821 | 9.9E-09 |         | SLC17A1;SLC17A2;SLC17A3                                                                      |
| 6  | rs645279  | T | 25988473 | -3.534 | 1.2E-07 |         | SLC17A1;SLC17A2;SLC17A3                                                                      |
| 6  | rs531750  | C | 25990621 | -3.526 | 1.3E-07 |         | SLC17A1;SLC17A2;SLC17A3                                                                      |
| 6  | rs599444  | A | 25991693 | -3.524 | 1.3E-07 |         | SLC17A1;SLC17A2;SLC17A3                                                                      |
| 6  | rs629444  | T | 25993793 | 5.310  | 7.4E-08 |         | SLC17A1;SLC17A2;SLC17A3                                                                      |
| 6  | rs9379801 | T | 26009690 | -4.229 | 3.0E-12 |         | SLC17A2;SLC17A3                                                                              |
| 6  | rs7749342 | T | 26028244 | -3.868 | 1.7E-10 | SLC17A2 | SLC17A2;TRIM38;SLC17A3                                                                       |
| 6  | rs9393676 | A | 26044923 | 4.131  | 9.2E-12 |         | SLC17A2;TRIM38                                                                               |
| 6  | rs9295678 | A | 26045012 | 4.128  | 9.4E-12 |         | TRIM38;SLC17A2                                                                               |
| 6  | rs2051541 | A | 26053190 | -4.145 | 5.9E-12 |         | SLC17A2;TRIM38                                                                               |
| 6  | rs115810  | C | 26083862 | 3.475  | 1.3E-07 | TRIM38  | HIST1H3A;HIST1H3B;HIST1H1A;SLC17A2;HIST1H2AB;HIST1H4B;TRIM38;HIST1H4A                        |
| 6  | rs199753  | A | 26109867 | 3.479  | 1.1E-07 |         | HIST1H3A;HIST1H1C;HIST1H3B;HIST1H2BB;HIST1H1A;HIST1H2AB;HIST1H4B;TRIM38;HIST1H4A;HIST1H4C    |
| 6  | rs199752  | T | 26120854 | 3.409  | 1.6E-07 |         | HIST1H3A;HIST1H1C;HIST1H3B;HIST1H2BB;HIST1H1A;HIST1H2AB;HIST1H4B;TRIM38;HIST1H4A;HIST1H4C    |
| 6  | rs199751  | T | 26123562 | -3.526 | 5.4E-08 |         | HIST1H3A;HIST1H1C;HIST1H3B;HIST1H2BB;HIST1H1A;HIST1H2AB;HIST1H4B;TRIM38;HIST1H4A;HIST1H4C    |
| 6  | rs199750  | T | 26124441 | 3.526  | 5.2E-08 |         | HIST1H3A;HIST1H1C;HIST1H3B;HIST1H2BB;HIST1H1A;HIST1H2AB;HIST1H4B;TRIM38;HIST1H4A;HIST1H4C    |
| 6  | rs9467664 | A | 26129792 | -3.315 | 2.8E-07 |         | HIST1H3A;HIST1H1C;HIST1H3B;HIST1H2BB;HIST1H1A;HIST1H2AB;HIST1H4B;TRIM38;HIST1H4A;HIST1H4C    |
| 6  | rs1540276 | T | 26136798 | -3.260 | 4.0E-07 |         | HIST1H3A;HIST1H1C;HIST1H3B;HIST1H2BB;HIST1H1A;HIST1H2AB;HIST1H4B;TRIM38;HIST1H4A;HFE         |
| 6  | rs807214  | C | 26169748 | 3.244  | 3.8E-07 |         | HIST1H3A;HIST1H1C;HIST1H3B;HIST1H4C;HIST1H2BB;HIST1H1A;HIST1H1T;HIST1H2AB;HIST1H4B;HIST1H4C  |
| 6  | rs807212  | A | 26173600 | -3.283 | 3.8E-07 |         | HIST1H2BC;HIST1H3A;HIST1H1C;HIST1H3B;HIST1H4C;HIST1H2BB;HIST1H2AC;HIST1H1A;HIST1H1T;HIST1H4B |
| 6  | rs2071303 | T | 26199315 | -3.302 | 2.5E-07 | HFE     | HIST1H2BC;HIST1H1C;HIST1H3B;HIST1H4C;HIST1H2BB;HIST1H2AC;HIST1H1T;HIST1H2AB;HFE;HIST1H4B     |
| 6  | rs793143  | T | NA       | -6.003 | 1.1E-07 |         |                                                                                              |
| 10 | rs1171618 | T | 61135947 | -3.503 | 1.7E-07 | SLC16A9 | SLC16A9                                                                                      |
| 11 | rs4247633 | T | 63982855 | -3.235 | 1.5E-07 |         |                                                                                              |
| 11 | rs4247634 | A | 63983064 | -3.227 | 1.5E-07 |         |                                                                                              |
| 11 | rs1003697 | A | 63990359 | 3.324  | 5.9E-08 |         |                                                                                              |
| 11 | rs1000662 | A | 63990395 | -3.324 | 5.9E-08 |         |                                                                                              |
| 11 | rs685272  | T | 63993609 | -3.326 | 5.6E-08 |         |                                                                                              |
| 11 | rs547484  | A | 63993697 | -3.385 | 2.3E-08 |         |                                                                                              |
| 11 | rs490581  | A | 63995372 | 3.313  | 6.2E-08 |         |                                                                                              |
| 11 | rs192133  | A | 63997117 | -3.365 | 2.5E-08 |         |                                                                                              |
| 11 | rs171284  | A | 63997226 | -3.365 | 2.5E-08 |         |                                                                                              |
| 11 | rs240696  | T | 63997327 | -3.365 | 2.5E-08 |         |                                                                                              |

|    |            |   |          |        |         |                                  |
|----|------------|---|----------|--------|---------|----------------------------------|
| 11 | rs475414   | A | 63998420 | -3.348 | 3.0E-08 |                                  |
| 11 | rs522485   | T | 64000770 | -3.476 | 1.1E-08 |                                  |
| 11 | rs606496   | T | 64006136 | 3.477  | 1.1E-08 |                                  |
| 11 | rs525192   | T | 64007041 | 3.478  | 1.0E-08 |                                  |
| 11 | rs634497   | T | 64007797 | -3.537 | 9.5E-09 |                                  |
| 11 | rs2845635  | T | 64009546 | 3.483  | 1.0E-08 |                                  |
| 11 | rs2845637  | T | 64010196 | 3.543  | 7.0E-09 |                                  |
| 11 | rs2845638  | T | 64010280 | -3.546 | 6.8E-09 |                                  |
| 11 | rs17299124 | A | 64013435 | -5.308 | 1.4E-10 |                                  |
| 11 | rs589852   | T | 64014016 | -3.635 | 3.3E-09 |                                  |
| 11 | rs604182   | T | 64014858 | -3.191 | 2.0E-07 |                                  |
| 11 | rs615311   | T | 64015081 | 3.279  | 2.4E-07 |                                  |
| 11 | rs617104   | C | 64015466 | -3.191 | 1.9E-07 |                                  |
| 11 | rs1210879  | T | 64016382 | 3.190  | 2.0E-07 |                                  |
| 11 | rs662228   | A | 64016683 | 3.188  | 2.0E-07 |                                  |
| 11 | rs661292   | A | 64017054 | 3.188  | 2.0E-07 |                                  |
| 11 | rs1210877  | T | 64021987 | 3.187  | 2.1E-07 | SLC22A11                         |
| 11 | rs7104498  | A | 64022820 | 3.185  | 2.1E-07 | SLC22A11                         |
| 11 | rs4930402  | A | 64026514 | -3.215 | 1.7E-07 | SLC22A11                         |
| 11 | rs7483260  | T | 64029610 | -3.214 | 1.7E-07 | SLC22A11                         |
| 11 | rs12417589 | A | 64058289 | -4.038 | 2.1E-11 | SLC22A12;SLC22A11                |
| 11 | rs11231808 | A | 64058917 | -4.042 | 2.1E-11 | SLC22A12;SLC22A11                |
| 11 | rs1939120  | A | 64061291 | 4.684  | 1.0E-07 | SLC22A12;SLC22A11                |
| 11 | rs7936185  | T | 64062028 | -4.175 | 4.7E-12 | SLC22A12;SLC22A11                |
| 11 | rs4930420  | C | 64063633 | -4.128 | 1.6E-11 | SLC22A12;SLC22A11                |
| 11 | rs7479811  | T | 64065360 | 4.761  | 7.7E-08 | SLC22A12;SLC22A11                |
| 11 | rs6591859  | A | 64068424 | 4.909  | 1.1E-15 | SLC22A12;SLC22A11                |
| 11 | rs4930423  | T | 64068473 | 4.912  | 1.1E-15 | SLC22A12;SLC22A11                |
| 11 | rs12362644 | T | 64068729 | 4.914  | 1.1E-15 | SLC22A12;SLC22A11                |
| 11 | rs11231816 | A | 64068979 | -4.909 | 1.2E-15 | SLC22A12;SLC22A11                |
| 11 | rs7124676  | A | 64069867 | -6.333 | 4.6E-23 | SLC22A11;SLC22A12                |
| 11 | rs4930426  | C | 64072490 | 6.323  | 5.1E-23 | SLC22A11;NRXN2;SLC22A12          |
| 11 | rs3759053  | T | 64079656 | -6.343 | 4.1E-23 | SLC22A12;SLC22A11;NRXN2          |
| 11 | rs7940321  | A | 64080696 | -6.402 | 4.3E-23 | SLC22A11 SLC22A12;SLC22A11;NRXN2 |
| 11 | rs693591   | C | 64081645 | 5.607  | 7.6E-11 | SLC22A11 SLC22A12;SLC22A11;NRXN2 |
| 11 | rs3782099  | T | 64084286 | 6.419  | 2.5E-23 | SLC22A11 SLC22A11;NRXN2;SLC22A12 |
| 11 | rs7943154  | A | 64084420 | 6.435  | 2.1E-23 | SLC22A11 SLC22A12;SLC22A11;NRXN2 |
| 11 | rs17300741 | A | 64088038 | 6.782  | 7.5E-26 | SLC22A11 SLC22A12;SLC22A11;NRXN2 |
| 11 | rs17372915 | A | 64088144 | -6.866 | 5.5E-26 | SLC22A11 SLC22A12;SLC22A11;NRXN2 |
| 11 | rs1783811  | A | 64089872 | 4.550  | 1.7E-10 | SLC22A11 SLC22A12;SLC22A11;NRXN2 |
| 11 | rs2078267  | T | 64090690 | -6.801 | 2.4E-26 | SLC22A11 SLC22A12;SLC22A11;NRXN2 |
| 11 | rs528211   | T | 64108297 | 4.804  | 2.8E-12 | SLC22A12;SLC22A11;NRXN2          |
| 11 | rs505802   | T | 64113648 | -4.703 | 5.1E-12 | SLC22A12;SLC22A11;NRXN2          |
| 11 | rs524023   | T | 64114841 | 4.624  | 1.0E-08 | SLC22A11;NRXN2;SLC22A12          |
| 11 | rs9734313  | T | 64114887 | -4.624 | 1.0E-08 | SLC22A12 SLC22A12;SLC22A11;NRXN2 |
| 11 | rs3825018  | A | 64115385 | -4.630 | 7.0E-09 | SLC22A12 SLC22A12;SLC22A11;NRXN2 |
| 11 | rs3825016  | T | 64115862 | -4.623 | 7.1E-09 | SLC22A12 SLC22A12;SLC22A11;NRXN2 |
| 11 | rs11231825 | T | 64116850 | 4.617  | 7.3E-09 | SLC22A12 SLC22A11;NRXN2;SLC22A12 |
| 11 | rs10897518 | T | 64117281 | -4.801 | 3.7E-13 | SLC22A12 SLC22A12;SLC22A11;NRXN2 |
| 11 | rs475688   | T | 64120867 | 3.580  | 2.4E-07 | SLC22A12 SLC22A11;NRXN2;SLC22A12 |
| 11 | rs893006   | A | 64122372 | -4.359 | 5.4E-11 | SLC22A12 SLC22A12;SLC22A11;NRXN2 |
| 11 | rs7932437  | T | 64130080 | 4.352  | 5.4E-11 | SLC22A12;SLC22A11;NRXN2          |
| 11 | rs4930556  | C | 64134302 | -4.323 | 7.2E-11 | NRXN2 SLC22A12;SLC22A11;NRXN2    |
| 11 | rs2277311  | A | 64144508 | -4.309 | 8.0E-11 | NRXN2 SLC22A12;SLC22A11;NRXN2    |
| 11 | rs2360873  | C | 64147733 | -4.294 | 9.3E-11 | NRXN2 SLC22A12;SLC22A11;NRXN2    |

|    |            |   |          |        |         |        |                                        |
|----|------------|---|----------|--------|---------|--------|----------------------------------------|
| 11 | rs10792443 | C | 64151828 | -4.285 | 9.9E-11 | NRXN2  | SLC22A12;SLC22A11;NRXN2                |
| 11 | rs11231845 | A | 64163995 | -4.281 | 1.0E-10 | NRXN2  | SLC22A12;NRXN2                         |
| 11 | rs555456   | T | 64174835 | 4.259  | 1.2E-10 | NRXN2  | SLC22A12;NRXN2                         |
| 11 | rs544838   | T | 64185635 | 4.205  | 1.7E-10 | NRXN2  | SLC22A12;NRXN2                         |
| 11 | rs492175   | A | 64189654 | -4.199 | 1.8E-10 | NRXN2  | NRXN2                                  |
| 11 | rs2666559  | T | 64195803 | -4.190 | 2.0E-10 | NRXN2  | RASGRP2;NRXN2                          |
| 11 | rs506338   | T | 64197496 | 4.219  | 1.5E-10 | NRXN2  | RASGRP2;NRXN2                          |
| 11 | rs519090   | C | 64212816 | -4.197 | 2.3E-10 | NRXN2  | PYGM;RASGRP2;NRXN2                     |
| 11 | rs504915   | A | 64220661 | -4.190 | 2.5E-10 | NRXN2  | PYGM;RASGRP2;NRXN2                     |
| 11 | rs500531   | T | 64243595 | -4.252 | 3.3E-10 | NRXN2  | SF1;NRXN2;PYGM;RASGRP2                 |
| 11 | rs10897526 | T | 64316474 | -4.762 | 7.1E-10 | MAP4K2 | MEN1;SF1;MAP4K2;PYGM;RASGRP2;CDC42BPG  |
| 11 | rs6591188  | T | 65224529 | -3.256 | 3.6E-07 |        | RELA;SIPA1;RNASEH2C;HTATIP             |
| 11 | rs9666878  | A | 65232392 | 3.241  | 4.0E-07 |        | RELA;SIPA1;RNASEH2C;HTATIP             |
| 11 | rs4645933  | T | 65241696 | 3.258  | 3.5E-07 | HTATIP | RELA;RNASEH2C;DKFZp761E198;HTATIP      |
| 12 | rs11172134 | A | 55932056 | -4.754 | 4.4E-10 |        | NXPH4;R3HDM2;SHMT2;NDUFA4L2;STAC3;LRP1 |
| 12 | rs11172147 | A | 55982944 | -4.704 | 4.1E-11 |        | R3HDM2;STAC3                           |
| 12 | rs4760355  | A | 56011464 | -4.682 | 4.7E-11 |        | R3HDM2                                 |
| 12 | rs11609805 | A | 56021312 | -4.683 | 4.6E-11 |        | R3HDM2                                 |
| 12 | rs4760254  | C | 56052659 | -4.735 | 3.1E-11 |        |                                        |
| 12 | rs4760278  | A | 56057420 | -4.745 | 3.0E-11 |        | INHBC                                  |
| 12 | rs11613352 | T | 56078847 | -4.703 | 3.9E-11 |        | INHBE;INHBC                            |
| 12 | rs1106766  | T | 56095723 | -5.162 | 1.9E-11 |        | INHBE;GLI1;ARHGAP9;INHBC               |
| 12 | rs11614506 | T | 56101942 | 4.707  | 3.8E-11 |        | INHBE;GLI1;ARHGAP9;INHBC               |
| 12 | rs7964492  | A | 56109852 | 4.711  | 4.2E-11 |        | INHBE;GLI1;ARHGAP9;MARS;INHBC          |
| 12 | rs3741414  | T | 56130316 | -4.642 | 3.4E-10 | INHBC  | INHBE;GLI1;ARHGAP9;MARS;INHBC          |

**Table 7s. SNPs Associated with Gout ( $p < 4e-7$ ) and  $MAF \geq 0.02$  in meta-analysis of CHARGE cohorts.**

| Chr | SNP ID     | Coded Allele | Noncoded Allele | Position | Effects | P        | In RefGene | RefGenes within 60kb |
|-----|------------|--------------|-----------------|----------|---------|----------|------------|----------------------|
| 4   | rs10805346 | T            | C               | 9529445  | 0.3596  | 3.50E-14 | SLC2A9     | SLC2A9               |
| 4   | rs874432   | A            | T               | 9529704  | -0.4977 | 3.70E-15 | SLC2A9     | SLC2A9               |
| 4   | rs16890979 | T            | C               | 9531265  | -0.48   | 9.44E-15 | SLC2A9     | SLC2A9               |
| 4   | rs938564   | T            | G               | 9531671  | 0.5017  | 3.04E-15 | SLC2A9     | SLC2A9               |
| 4   | rs734553   | T            | G               | 9532102  | 0.4764  | 2.78E-14 | SLC2A9     | SLC2A9               |
| 4   | rs6832439  | A            | G               | 9533417  | -0.4992 | 3.76E-15 | SLC2A9     | SLC2A9               |
| 4   | rs938554   | C            | G               | 9534790  | -0.4995 | 3.68E-15 | SLC2A9     | SLC2A9               |
| 4   | rs938555   | A            | G               | 9535149  | -0.4994 | 3.74E-15 | SLC2A9     | SLC2A9               |
| 4   | rs13129697 | T            | G               | 9536065  | 0.4129  | 3.66E-13 | SLC2A9     | SLC2A9               |
| 4   | rs6838021  | T            | C               | 9536718  | -0.4992 | 3.94E-15 | SLC2A9     | SLC2A9               |
| 4   | rs737267   | T            | G               | 9543842  | -0.4439 | 5.20E-14 | SLC2A9     | SLC2A9               |
| 4   | rs6855911  | A            | G               | 9545008  | 0.4447  | 5.14E-14 | SLC2A9     | SLC2A9               |
| 4   | rs7670751  | A            | C               | 9547871  | 0.4162  | 5.41E-09 | SLC2A9     | SLC2A9               |
| 4   | rs938558   | A            | G               | 9548303  | 0.4234  | 6.00E-14 | SLC2A9     | SLC2A9               |
| 4   | rs5028843  | A            | G               | 9549904  | -0.4443 | 6.45E-14 | SLC2A9     | SLC2A9               |
| 4   | rs4697913  | T            | C               | 9550360  | -0.4852 | 2.50E-15 | SLC2A9     | SLC2A9               |
| 4   | rs7675964  | T            | C               | 9550532  | -0.4371 | 2.35E-14 | SLC2A9     | SLC2A9               |
| 4   | rs12498742 | A            | G               | 9553150  | 0.4516  | 1.77E-13 | SLC2A9     | SLC2A9               |
| 4   | rs4697700  | C            | G               | 9554890  | -0.4627 | 5.40E-14 | SLC2A9     | SLC2A9               |
| 4   | rs4697701  | A            | G               | 9555193  | -0.4538 | 1.24E-14 | SLC2A9     | SLC2A9               |
| 4   | rs4475146  | A            | C               | 9555754  | -0.4875 | 8.17E-15 | SLC2A9     | SLC2A9               |
| 4   | rs11723439 | T            | C               | 9560917  | -0.4851 | 5.10E-13 | SLC2A9     | SLC2A9               |
| 4   | rs4481233  | T            | C               | 9565177  | -0.513  | 3.15E-13 | SLC2A9     | SLC2A9               |
| 4   | rs11942223 | T            | C               | 9571863  | 0.4958  | 3.45E-14 | SLC2A9     | SLC2A9               |
| 4   | rs6449173  | T            | G               | 9575203  | 0.4925  | 4.06E-14 | SLC2A9     | SLC2A9               |
| 4   | rs7442295  | A            | G               | 9575478  | 0.4924  | 4.17E-14 | SLC2A9     | SLC2A9               |
| 4   | rs9998811  | A            | G               | 9575575  | -0.4918 | 4.17E-14 | SLC2A9     | SLC2A9               |
| 4   | rs7376960  | A            | G               | 9579668  | 0.4779  | 7.06E-14 | SLC2A9     | SLC2A9               |
| 4   | rs7439210  | C            | G               | 9580847  | 0.4642  | 5.45E-13 | SLC2A9     | SLC2A9               |
| 4   | rs1071988  | A            | G               | 9583736  | 0.4575  | 6.67E-13 | SLC2A9     | SLC2A9               |
| 4   | rs16868246 | C            | G               | 9587403  | -0.4556 | 6.83E-13 | SLC2A9     | SLC2A9               |
| 4   | rs11722229 | A            | C               | 9589795  | 0.4535  | 7.69E-13 | SLC2A9     | SLC2A9               |
| 4   | rs13131257 | T            | C               | 9590987  | -0.4501 | 9.77E-13 | SLC2A9     | SLC2A9               |
| 4   | rs13145758 | A            | G               | 9591095  | 0.4438  | 2.07E-12 | SLC2A9     | SLC2A9               |
| 4   | rs13125209 | A            | C               | 9591142  | -0.4527 | 2.52E-12 | SLC2A9     | SLC2A9               |
| 4   | rs13125646 | A            | G               | 9591428  | -0.4768 | 3.43E-12 | SLC2A9     | SLC2A9               |
| 4   | rs7660895  | A            | G               | 9594543  | -0.4545 | 2.16E-14 | SLC2A9     | SLC2A9               |
| 4   | rs7680126  | A            | G               | 9594694  | 0.4544  | 4.93E-13 | SLC2A9     | SLC2A9               |
| 4   | rs4385059  | T            | C               | 9598331  | 0.4355  | 2.95E-11 | SLC2A9     | SLC2A9               |
| 4   | rs6449213  | T            | C               | 9603313  | 0.4319  | 3.67E-11 | SLC2A9     | SLC2A9               |
| 4   | rs3775948  | C            | G               | 9604280  | 0.4017  | 1.01E-11 | SLC2A9     | SLC2A9               |
| 4   | rs13111638 | T            | C               | 9605988  | -0.4467 | 1.04E-11 | SLC2A9     | SLC2A9               |
| 4   | rs4529048  | A            | C               | 9606210  | 0.415   | 2.12E-12 | SLC2A9     | SLC2A9               |
| 4   | rs3733588  | A            | G               | 9606401  | 0.4162  | 1.78E-12 | SLC2A9     | SLC2A9               |
| 4   | rs7669607  | T            | C               | 9606899  | -0.4296 | 6.04E-12 | SLC2A9     | SLC2A9               |
| 4   | rs10939650 | T            | C               | 9607538  | 0.4253  | 5.96E-13 | SLC2A9     | SLC2A9               |
| 4   | rs13113918 | A            | G               | 9607591  | -0.3812 | 3.26E-07 | SLC2A9     | SLC2A9               |
| 4   | rs1014290  | A            | G               | 9610959  | 0.4263  | 4.75E-13 | SLC2A9     | SLC2A9               |
| 4   | rs9991278  | T            | C               | 9611763  | -0.4337 | 5.07E-12 | SLC2A9     | SLC2A9               |



|   |            |   |   |         |         |          |        |             |
|---|------------|---|---|---------|---------|----------|--------|-------------|
| 4 | rs10023068 | A | G | 9613930 | -0.3897 | 6.19E-09 | SLC2A9 | SLC2A9      |
| 4 | rs6853437  | A | G | 9614533 | 0.3887  | 6.66E-09 | SLC2A9 | SLC2A9      |
| 4 | rs10022499 | A | C | 9615635 | 0.3837  | 8.20E-09 | SLC2A9 | SLC2A9      |
| 4 | rs9291640  | T | C | 9616184 | 0.3828  | 8.69E-09 | SLC2A9 | SLC2A9      |
| 4 | rs9291642  | T | C | 9616373 | 0.3924  | 2.48E-07 | SLC2A9 | SLC2A9      |
| 4 | rs12509955 | T | C | 9633401 | -0.3728 | 4.63E-09 | SLC2A9 | WDR1;SLC2A9 |
| 4 | rs6826764  | C | G | 9639892 | 0.396   | 5.09E-09 | SLC2A9 | WDR1;SLC2A9 |
| 4 | rs10006397 | A | C | 9645238 | 0.3929  | 5.83E-09 | SLC2A9 | WDR1;SLC2A9 |
| 4 | rs7349721  | A | T | 9651660 | -0.3797 | 1.12E-08 |        | WDR1;SLC2A9 |
| 4 | rs733175   | T | C | 9659239 | 0.3767  | 1.14E-08 |        | WDR1;SLC2A9 |
| 4 | rs7671266  | T | C | 9665474 | -0.3627 | 9.50E-09 |        | WDR1;SLC2A9 |
| 4 | rs4320137  | T | C | 9682067 | 0.3924  | 2.62E-07 |        | WDR1;SLC2A9 |
| 4 | rs717614   | C | G | 9713886 | 0.2633  | 2.74E-08 | WDR1   | WDR1        |
| 4 | rs12509714 | C | G | 9716189 | -0.3084 | 4.39E-10 | WDR1   | WDR1        |
| 4 | rs4604059  | T | C | 9724163 | -0.2665 | 2.02E-08 | WDR1   | WDR1        |
| 4 | rs12498927 | A | G | 9724621 | -0.2694 | 1.37E-08 | WDR1   | WDR1        |
| 4 | rs10009493 | C | G | 9741145 | 0.3623  | 7.89E-08 |        | WDR1        |
| 4 | rs10939723 | T | G | 9748203 | -0.3546 | 1.06E-07 |        | WDR1        |
| 4 | rs10022911 | A | G | 9749649 | 0.3391  | 2.72E-07 |        | WDR1        |
| 4 | rs10020887 | C | G | 9749849 | 0.3521  | 1.52E-07 |        | WDR1        |
| 4 | rs17198547 | T | C | 9750517 | -0.3468 | 2.38E-07 |        | WDR1        |
| 4 | rs17251963 | T | C | 9751659 | 0.3737  | 6.00E-08 |        | WDR1        |
| 4 | rs4697714  | A | T | 9752884 | -0.351  | 1.92E-07 |        | WDR1        |
| 4 | rs4640669  | A | G | 9754831 | -0.3415 | 2.30E-07 |        | WDR1        |
| 4 | rs4697933  | A | G | 9755591 | -0.3515 | 1.67E-07 |        | WDR1        |
| 4 | rs11735668 | C | G | 9757753 | 0.351   | 2.84E-07 |        | WDR1        |
| 4 | rs11721682 | T | C | 9760245 | -0.3533 | 3.05E-07 |        | WDR1        |
| 4 | rs6834055  | A | T | 9767609 | 0.3452  | 1.95E-07 |        | WDR1        |
| 4 | rs2903827  | C | G | 9784970 | 0.3686  | 2.78E-08 |        | WDR1        |
| 4 | rs11724112 | T | C | 9789741 | 0.2939  | 3.38E-10 |        |             |
| 4 | rs6811287  | T | C | 9789921 | -0.2899 | 4.47E-10 |        |             |
| 4 | rs4697957  | A | G | 9791352 | 0.3499  | 6.39E-08 |        |             |
| 4 | rs887732   | C | G | 9792215 | -0.3502 | 6.26E-08 |        |             |
| 4 | rs929575   | C | G | 9805984 | 0.3772  | 2.14E-08 |        |             |
| 4 | rs17389602 | A | T | 9816024 | -0.3807 | 1.72E-08 |        |             |
| 4 | rs2080072  | C | G | 9844720 | -0.309  | 2.40E-10 |        |             |
| 4 | rs11734783 | T | C | 9849761 | 0.434   | 9.30E-09 |        |             |
| 4 | rs1978274  | T | G | 9854185 | 0.3857  | 1.68E-08 |        |             |
| 4 | rs11735543 | T | G | 9860750 | -0.3892 | 5.00E-08 |        |             |
| 4 | rs17406107 | T | G | 9872478 | 0.3822  | 1.87E-08 |        |             |
| 4 | rs10805364 | A | G | 9884616 | 0.3854  | 5.74E-09 |        |             |
| 4 | rs10489070 | C | G | 9885450 | 0.3858  | 5.56E-09 |        |             |
| 4 | rs12510549 | T | C | 9885565 | 0.3847  | 6.12E-09 |        |             |
| 4 | rs16895984 | T | C | 9893825 | 0.3092  | 3.50E-08 |        |             |
| 4 | rs4698009  | T | C | 9894091 | 0.3568  | 3.05E-08 |        |             |
| 4 | rs4698014  | T | C | 9895399 | -0.3579 | 2.78E-08 |        |             |
| 4 | rs2024280  | T | C | 9900911 | 0.3915  | 2.38E-09 |        |             |
| 4 | rs11731652 | T | C | 9902082 | 0.3639  | 1.95E-08 |        |             |
| 4 | rs2868937  | T | C | 9912179 | -0.3512 | 2.39E-08 |        |             |
| 4 | rs4698023  | A | G | 9913824 | 0.3512  | 2.40E-08 |        |             |
| 4 | rs7689060  | C | G | 9914561 | -0.3555 | 4.16E-08 |        |             |
| 4 | rs12511337 | A | G | 9921070 | -0.3409 | 5.08E-08 |        |             |
| 4 | rs4698029  | C | G | 9921896 | 0.3399  | 5.42E-08 |        |             |
| 4 | rs714436   | A | C | 9923765 | 0.3452  | 3.23E-08 |        |             |
| 4 | rs4698031  | A | G | 9925019 | 0.3554  | 1.25E-08 |        |             |

|   |            |   |   |          |         |          |       |                 |
|---|------------|---|---|----------|---------|----------|-------|-----------------|
| 4 | rs17418478 | A | G | 9925949  | -0.3517 | 1.83E-07 |       |                 |
| 4 | rs17418533 | T | C | 9926039  | 0.356   | 1.24E-08 |       |                 |
| 4 | rs11722185 | C | G | 9926580  | 0.3562  | 1.26E-08 |       |                 |
| 4 | rs4698036  | T | G | 9940392  | 0.3511  | 8.71E-09 |       |                 |
| 4 | rs11729318 | C | G | 9946017  | -0.3628 | 1.08E-08 |       |                 |
| 4 | rs17420080 | T | C | 9954646  | -0.3423 | 9.25E-08 |       |                 |
| 4 | rs4698040  | T | C | 9961648  | -0.3807 | 4.90E-09 |       |                 |
| 4 | rs7681212  | C | G | 9968062  | 0.3118  | 2.60E-07 |       |                 |
| 4 | rs10938772 | A | G | 9984426  | 0.3062  | 2.45E-07 |       |                 |
| 4 | rs4693920  | T | C | 89083799 | -0.4253 | 1.19E-07 |       | SPP1            |
| 4 | rs2728123  | T | C | 89089819 | -0.424  | 2.40E-07 |       | PKD2;SPP1       |
| 4 | rs2728119  | A | G | 89096555 | -0.3706 | 4.84E-09 |       | PKD2;SPP1       |
| 4 | rs11730059 | A | G | 89106351 | 0.4469  | 1.39E-10 |       | PKD2;SPP1       |
| 4 | rs2725234  | T | C | 89151296 | 0.4809  | 8.19E-13 | PKD2  | PKD2;SPP1       |
| 4 | rs2728113  | A | G | 89158760 | -0.4779 | 1.14E-12 | PKD2  | PKD2;SPP1       |
| 4 | rs2728109  | A | C | 89176747 | 0.4924  | 2.79E-13 | PKD2  | PKD2;SPP1;ABCG2 |
| 4 | rs2725217  | A | T | 89179282 | -0.4955 | 1.67E-13 | PKD2  | PKD2;SPP1;ABCG2 |
| 4 | rs2725215  | T | C | 89180595 | 0.5036  | 1.46E-13 | PKD2  | PKD2;SPP1;ABCG2 |
| 4 | rs2725212  | A | G | 89187737 | -0.371  | 5.95E-09 | PKD2  | PKD2;ABCG2      |
| 4 | rs2725211  | T | C | 89189399 | 0.4469  | 3.32E-11 | PKD2  | PKD2;ABCG2      |
| 4 | rs2728106  | A | G | 89191075 | 0.3618  | 1.29E-08 | PKD2  | PKD2;ABCG2      |
| 4 | rs2728104  | T | C | 89192030 | -0.417  | 3.16E-10 | PKD2  | PKD2;ABCG2      |
| 4 | rs2725210  | A | G | 89192451 | -0.3401 | 7.27E-08 | PKD2  | PKD2;ABCG2      |
| 4 | rs2728099  | T | C | 89194762 | -0.4864 | 7.77E-12 | PKD2  | PKD2;ABCG2      |
| 4 | rs2725207  | A | C | 89198553 | 0.3663  | 5.93E-09 | PKD2  | PKD2;ABCG2      |
| 4 | rs2728133  | T | C | 89200714 | -0.3653 | 7.19E-09 | PKD2  | PKD2;ABCG2      |
| 4 | rs2728132  | A | C | 89201485 | -0.3665 | 6.60E-09 | PKD2  | PKD2;ABCG2      |
| 4 | rs2725205  | A | G | 89204735 | 0.3668  | 6.45E-09 | PKD2  | PKD2;ABCG2      |
| 4 | rs4336187  | A | G | 89206940 | -0.3708 | 4.33E-09 | PKD2  | PKD2;ABCG2      |
| 4 | rs2725203  | T | C | 89214819 | -0.3641 | 7.08E-09 | PKD2  | PKD2;ABCG2      |
| 4 | rs2728121  | T | C | 89216126 | 0.4501  | 2.27E-11 | PKD2  | PKD2;ABCG2      |
| 4 | rs2728126  | A | T | 89218246 | 0.455   | 2.85E-12 |       | PKD2;ABCG2      |
| 4 | rs2728125  | A | G | 89220917 | -0.4803 | 3.20E-13 |       | PKD2;ABCG2      |
| 4 | rs2231164  | T | C | 89234881 | -0.426  | 4.92E-12 | ABCG2 | PKD2;ABCG2      |
| 4 | rs2231156  | A | C | 89239451 | 0.5324  | 1.06E-15 | ABCG2 | PKD2;ABCG2      |
| 4 | rs4148157  | A | G | 89239958 | 0.5324  | 1.06E-15 | ABCG2 | PKD2;ABCG2      |
| 4 | rs4693924  | A | G | 89242248 | 0.5342  | 7.40E-16 | ABCG2 | PKD2;ABCG2      |
| 4 | rs2054576  | A | G | 89247799 | -0.5423 | 8.10E-16 | ABCG2 | PKD2;ABCG2      |
| 4 | rs12505410 | T | G | 89249865 | 0.2688  | 2.98E-07 | ABCG2 | PKD2;ABCG2      |
| 4 | rs2622621  | C | G | 89249944 | -0.2726 | 2.92E-08 | ABCG2 | PKD2;ABCG2      |
| 4 | rs1481012  | A | G | 89258106 | -0.6148 | 3.48E-23 | ABCG2 | PKD2;ABCG2      |
| 4 | rs2199936  | A | G | 89264355 | 0.6183  | 2.60E-23 | ABCG2 | PKD2;ABCG2      |
| 4 | rs2231142  | T | G | 89271347 | 0.6021  | 4.41E-23 | ABCG2 | PKD2;ABCG2      |
| 4 | rs4148155  | A | G | 89273691 | -0.6037 | 3.55E-23 | ABCG2 | PKD2;ABCG2      |
| 4 | rs2622626  | A | C | 89285739 | 0.253   | 2.10E-08 | ABCG2 | ABCG2           |
| 4 | rs17731799 | T | G | 89287479 | 0.2722  | 3.14E-09 | ABCG2 | ABCG2           |
| 4 | rs2622624  | T | C | 89288430 | -0.2727 | 2.95E-09 | ABCG2 | ABCG2           |
| 4 | rs2622605  | T | C | 89298410 | -0.3024 | 4.55E-11 | ABCG2 | ABCG2           |
| 4 | rs3114020  | T | C | 89302690 | -0.3057 | 3.38E-11 |       | ABCG2           |
| 4 | rs10011796 | T | C | 89309901 | 0.2576  | 2.05E-08 |       | ABCG2           |
| 4 | rs10009618 | T | C | 89313032 | -0.2546 | 2.63E-08 |       | ABCG2           |
| 4 | rs1481017  | T | C | 89316501 | -0.2549 | 2.68E-08 |       | ABCG2           |

9

rs13287980

A

G

106364021

0.3472

1.09E-07

OR13C8;OR13C2;OR13C3;OR13C4;OR13C9;OR13F

## Supplementary Figures

**Figure 1s. Genome-wide association results from meta-analyses of five studies for urate and gout.** Each point in the plot corresponds to a SNP with chromosome location and  $-\log_{10}$  (p-value) as x- and y-coordinates respectively. Panel A: Left plot includes the complete set of p-values from urate association analyses, and right plot offers an amplified view restricted to SNPs with p-values higher than  $10^{-15}$ . Panel B: Complete set of p-values from gout association analyses. The genomic control parameters were all below 1.05 within individual cohorts, and in combined meta-analysis results.

**Figure 2s. Regional plots of loci associated with urate (A-H)** The association p-values ( $-\log_{10}$  transformed, left y-axis) for SNPs in a region of each of the six loci: A) *SLC22A11*, B) *GCKR*, C) *R3HDM2-INHBC*, D) *RREB1*, E) *PDZK1*, F) *SLC2A9*, G) *ABCG2*, H) *SLC17A1* are plotted against their chromosome positions (NCBI build 36, x-axis). The regions were determined to include all SNPs with  $R^2$  of 0.1 or above with the top associated SNP, and each diamond represents a SNP with the color indicating the  $R^2$  range ( $R^2$  was estimated using HapMap CEU sample). The top associated SNP is plotted by a red diamond with size larger than others, and with the SNP name displayed on the top, and p-value on the right. The light blue curve in the background is the estimated recombination rate in HapMap with values indicated by the right y-axis. The bottom panel displays the reference genes in the region based on the UCSC Genome Browser March 2006 assembly, with the arrow indicating the direction of transcription. The light grey horizontal line corresponds to the p-value threshold of genome-wide significance,  $5 \times 10^{-8}$ .

**Figure 3s. Forest plots of the eight genome-wide significant loci for serum urate.** Two plots in each column were generated for each locus: the top plot displays the beta coefficient that is the increase in urate level ( $\mu\text{mol/L}$ ) per minor allele, and the bottom plot displays the odds ratio per minor allele with gout. In each plot, the value of each individual study and the meta-analysis

combined is displayed as a box with size proportional to the inverse of its variance and with a 95% confidence interval as blue lines extending from the box.

**Figure 1- A.  $-\log_{10}(p\text{-value})$  of Genome-wide association analyses of UA**

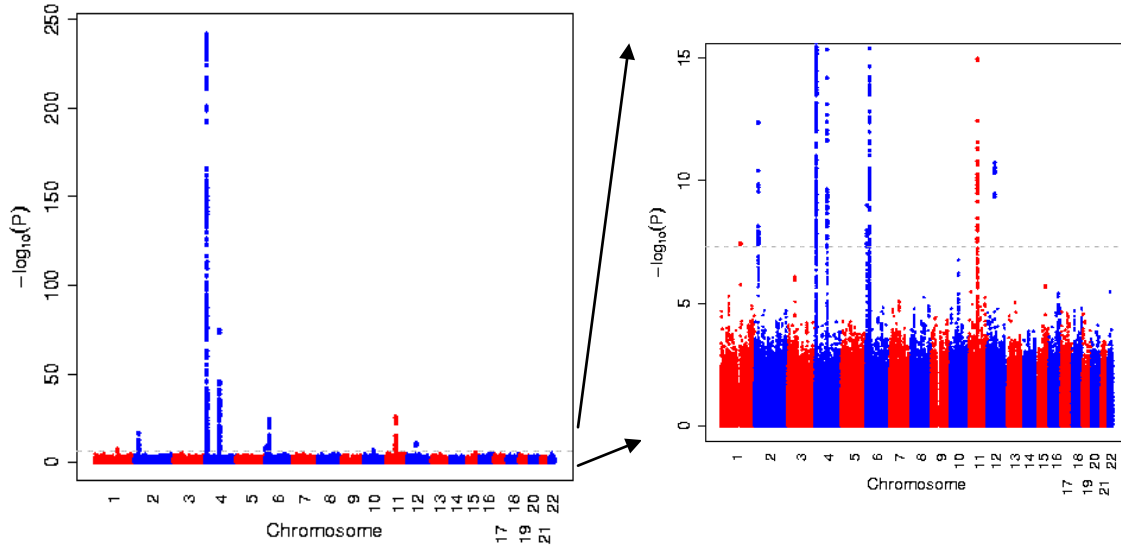

**Figure 1- B.  $-\log_{10}(p\text{-value})$  of Genome-wide association analyses of Gout**

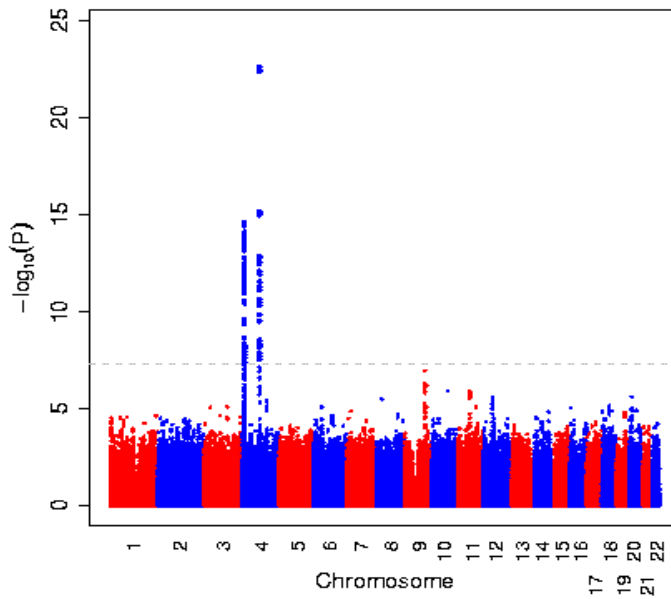

Figure 2s - A

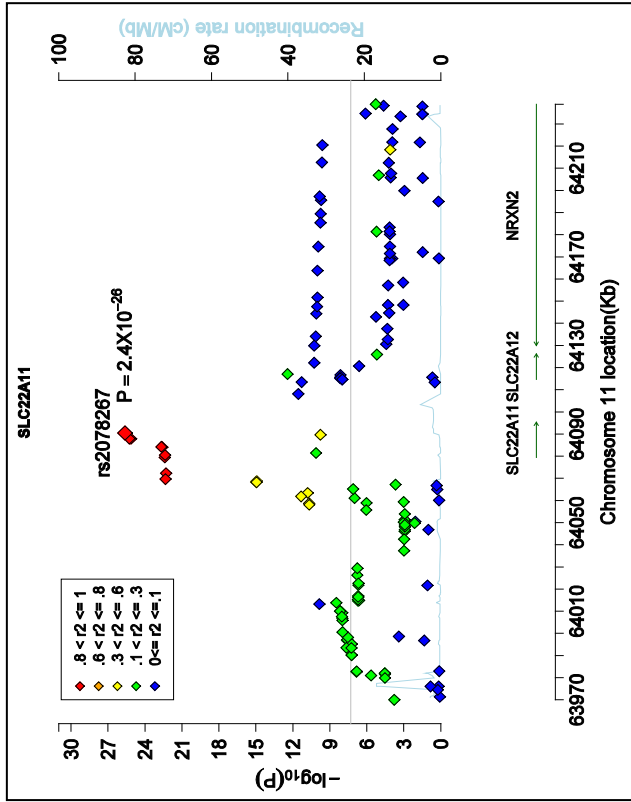

Figure 2s - B

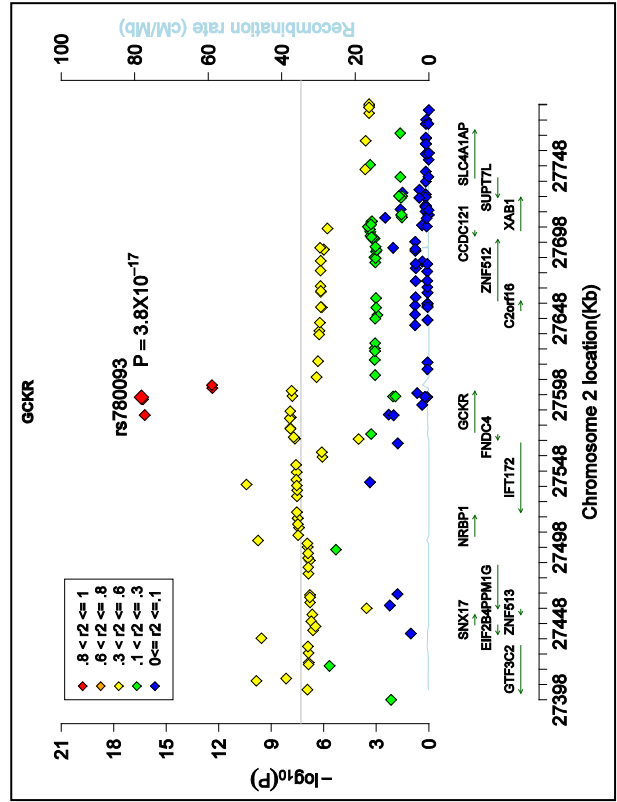

Figure 2s - C

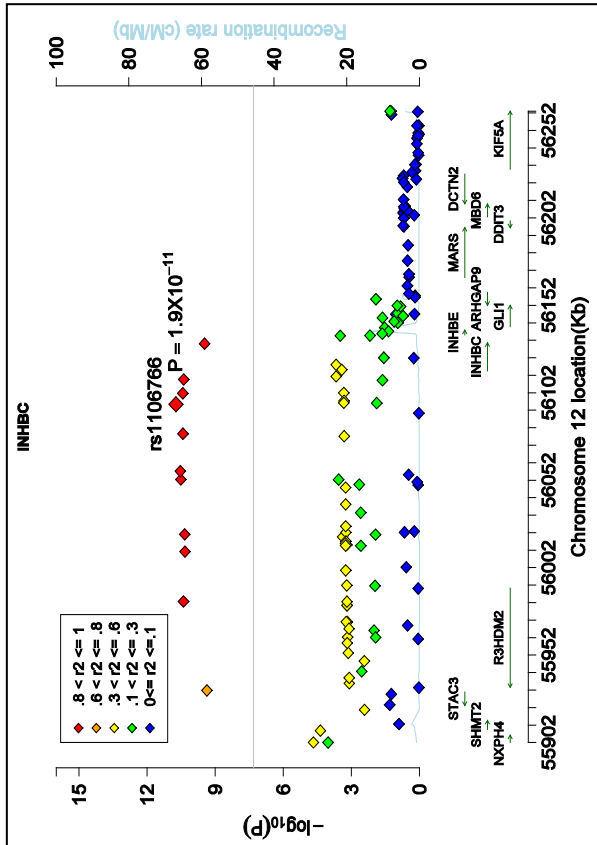

Figure 2s - D

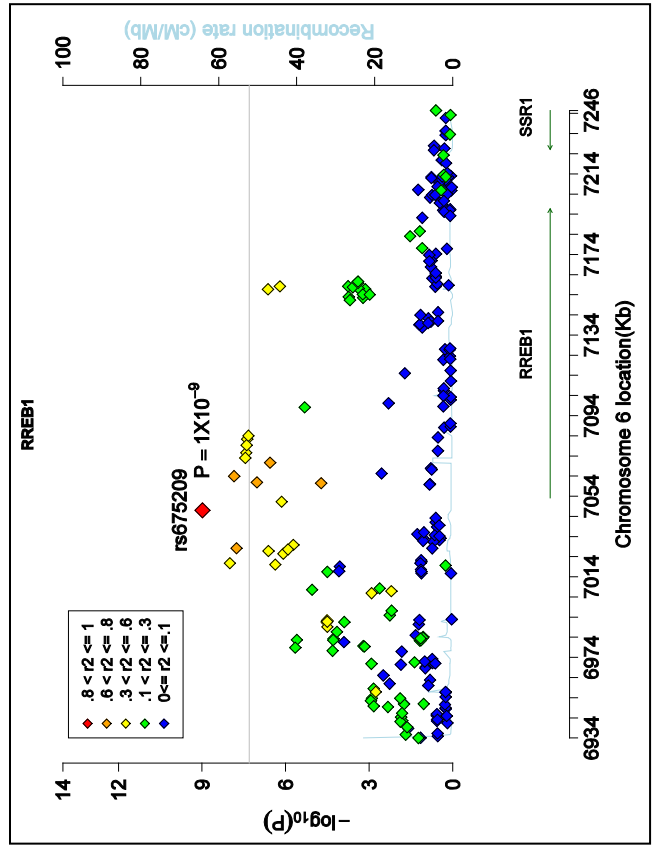

Figure 2s - E

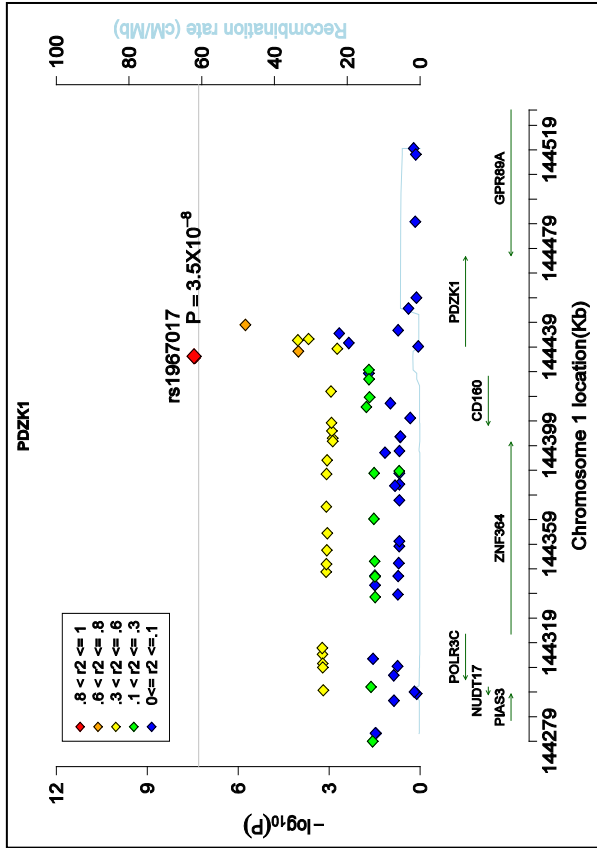

Figure 2s-G.

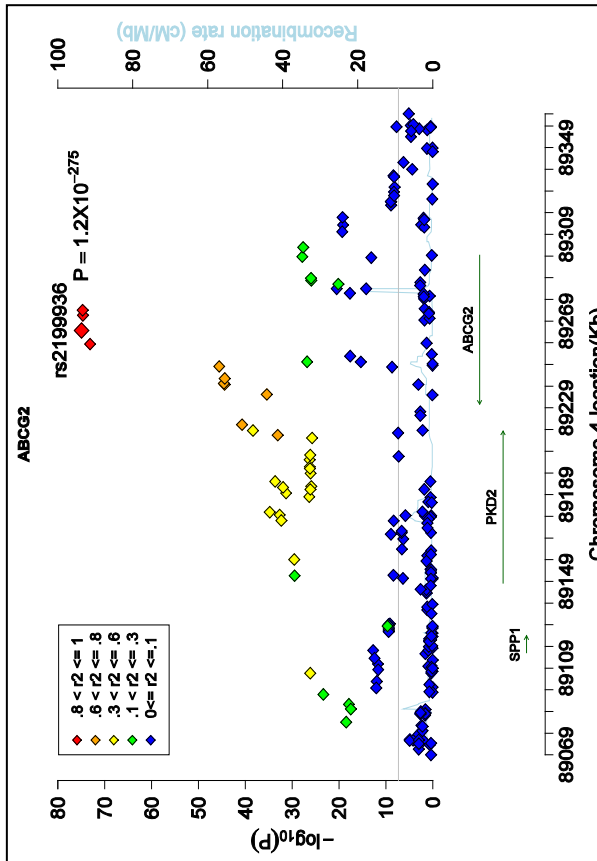

Figure 2s - F

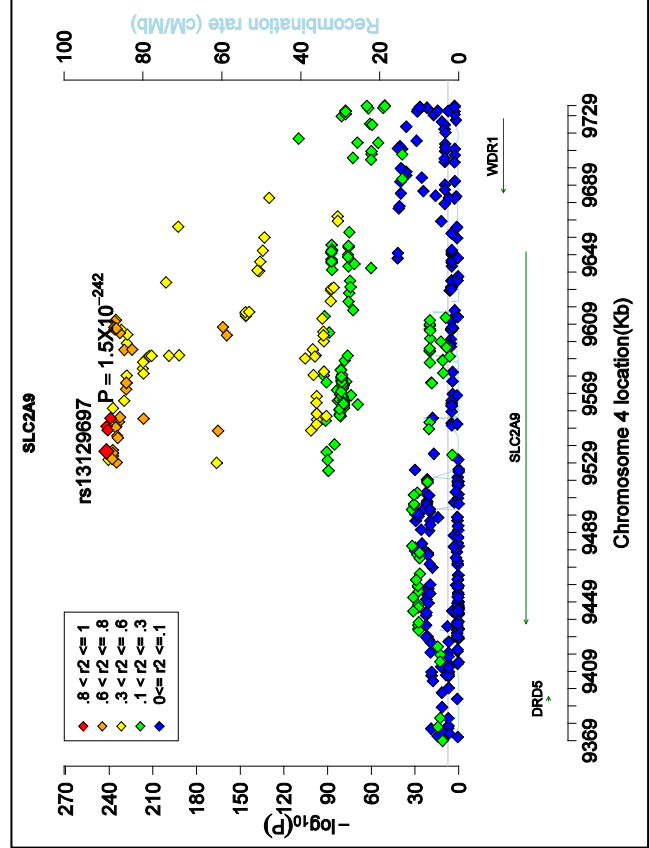

Figure 2s-H.

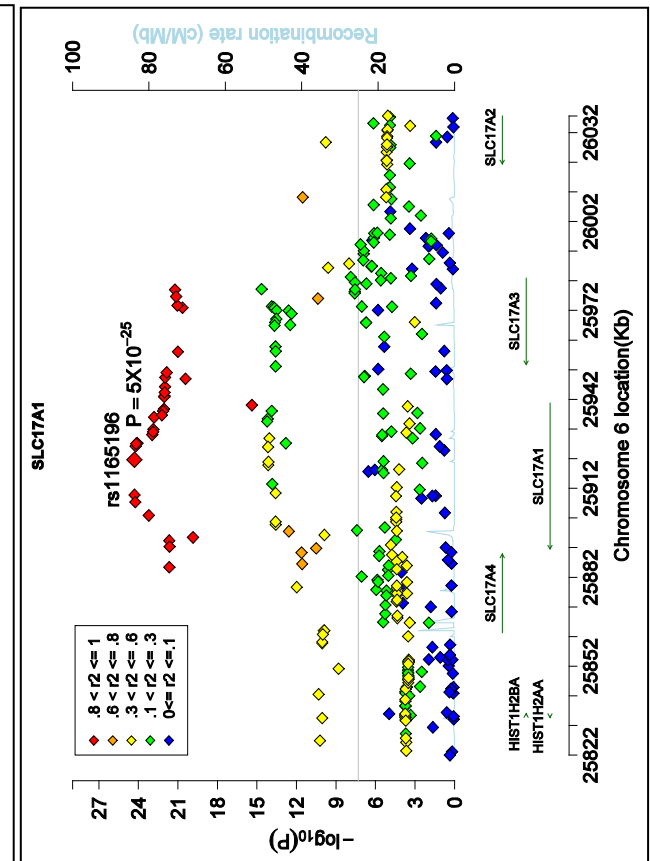

**Supplemental Figure 3s. Top row, urate beta coefficients; bottom row, gout odds ratio estimate for each SNP.**

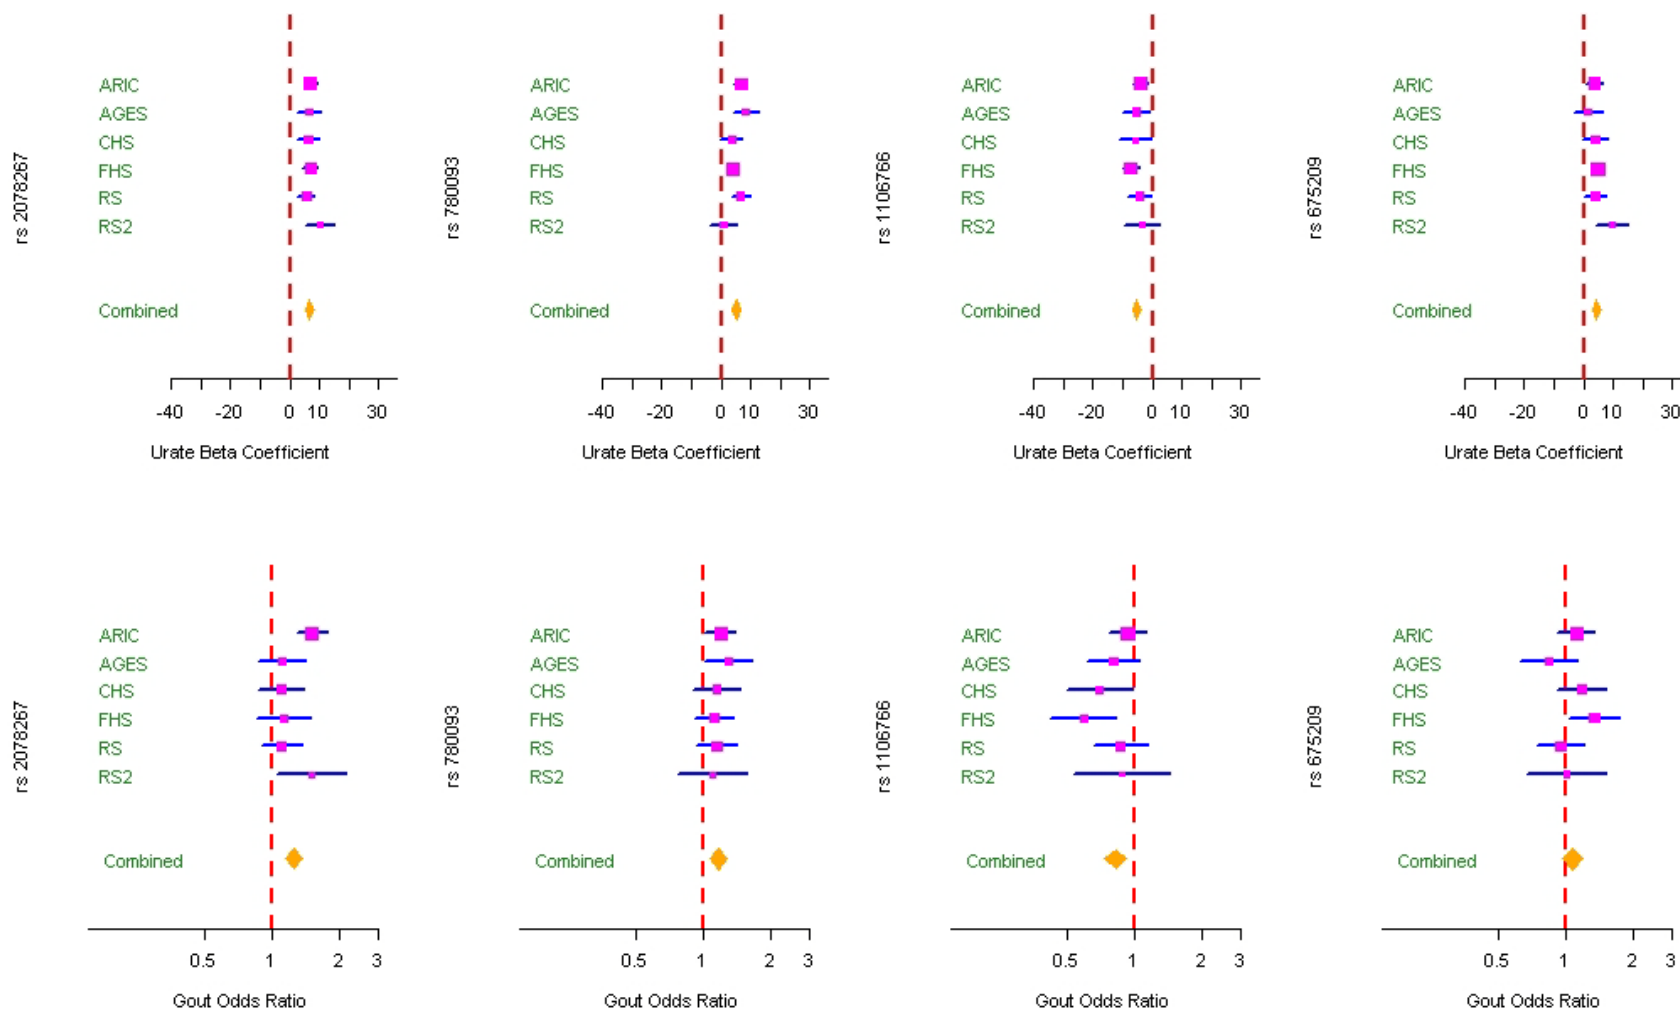



rs 1967017

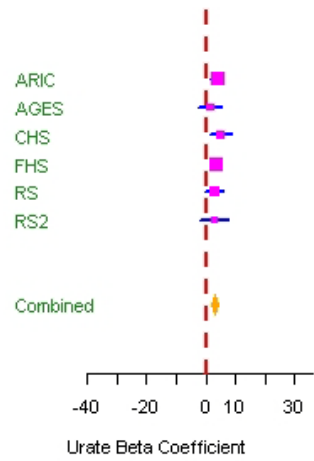

rs 13129697

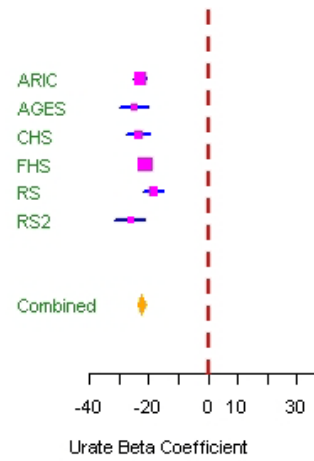

rs 2199936

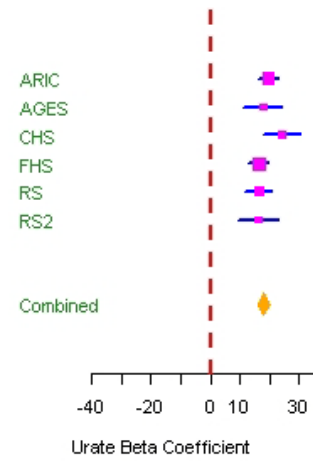

rs 1165196

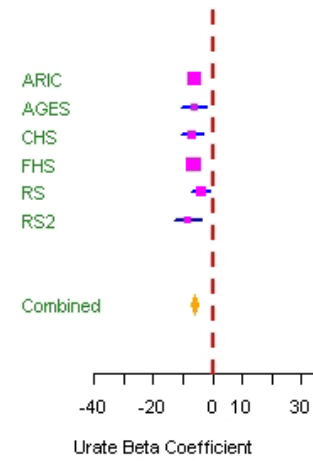

rs 1967017

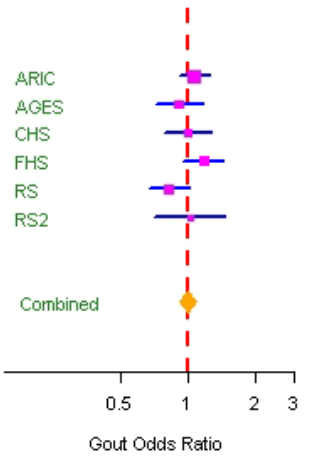

rs 13129697

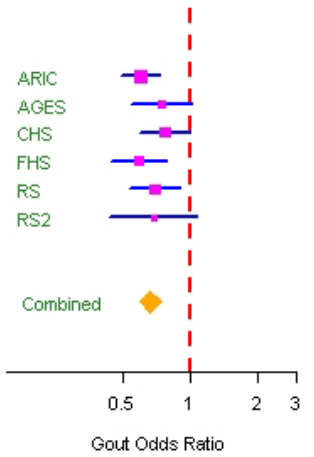

rs 2199936

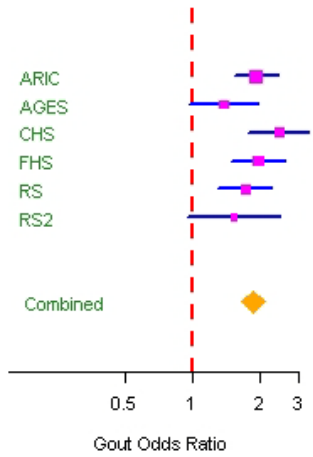

rs 1165196

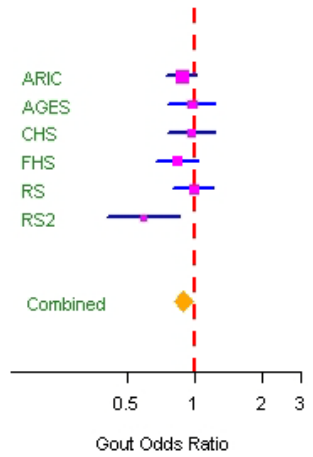

Supplement: NIHMS272945-supplement-Supp1.pdf [file NIHMS272945-supplement-Supp1.pdf]
